# Supplementary material
Source: PubMed Central journal article supplement (PMC3078359)
Supplement: 1008617108_sapp01.pdf [file 1008617108_sapp01.pdf]

## SUPPLEMENTARY MATERIALS

### The Draft Genome of the Globally Widespread and Invasive Argentine ant (*Linepithema humile*)

#### Table of Contents

|                                                                                |            |
|--------------------------------------------------------------------------------|------------|
| <b>SUPPLEMENTARY MATERIALS.....</b>                                            | <b>1</b>   |
| <b>AFFILIATIONS &amp; ROLES IN PROJECT .....</b>                               | <b>2</b>   |
| <b>SUPPLEMENTARY INFORMATION.....</b>                                          | <b>5</b>   |
| Source material (Table S1, S14; Fig. S17) .....                                | 5          |
| RNA library preparation and EST sequencing.....                                | 9          |
| Illumina Sequencing.....                                                       | 10         |
| Assembly.....                                                                  | 11         |
| Annotation (Table S2; Fig. S4) .....                                           | 12         |
| Cytoplasmic ribosomal protein genes .....                                      | 27         |
| Oxidative phosphorylation.....                                                 | 30         |
| Single nucleotide polymorphisms (SNPs)(Table S3, S8) .....                     | 32         |
| Repetitive DNA.....                                                            | 37         |
| Viruses and viroids (Table S4).....                                            | 39         |
| KEGG, InterProScan, Gene Ontology Analysis (Table S7, S5; Fig. S2, S3, S6).... | 40         |
| OrthoMCL.....                                                                  | 54         |
| Mitochondrial genome (Fig. S1) .....                                           | 55         |
| GC Compositional Domain Analysis (Table S9; Fig. S5-S10).....                  | 56         |
| MicroRNAs.....                                                                 | 65         |
| RNAi (Fig. S16).....                                                           | 66         |
| Wing and reproductive system development (Fig. S11) .....                      | 68         |
| Chemoreception (Grs, OBPs, Ors, IRs) (Table S10, S15, S11, S12) .....          | 72         |
| Delta 9 desaturase genes (Fig. S15) .....                                      | 94         |
| Cytochrome P450s (Fig. S13) .....                                              | 98         |
| Hox genes (Fig. S18) .....                                                     | 99         |
| Immune response (Table S16) .....                                              | 101        |
| Opsins .....                                                                   | 104        |
| Behavior.....                                                                  | 105        |
| Yellow/Major royal jelly proteins (Fig. S14) .....                             | 108        |
| Insulin signaling .....                                                        | 110        |
| Evolutionary rate analysis (Fig. S19) .....                                    | 112        |
| Foraging Gene qPCR (Fig. S20) .....                                            | 114        |
| Annotation of the <i>L. humile</i> genome as a teaching tool .....             | 116        |
| <b>ACKNOWLEDGEMENTS.....</b>                                                   | <b>117</b> |

## AFFILIATIONS & ROLES IN PROJECT

Christopher D. Smith<sup>a\*</sup>, Aleksey Zimin<sup>b</sup>, Carson Holt<sup>c</sup>, Ehab Abouheif<sup>d</sup>, Richard Benton<sup>e</sup>, Elizabeth Cash<sup>f</sup>, Vincent Croset<sup>e</sup>, Cameron R. Currie<sup>g,h</sup>, Eran Elhaik<sup>i</sup>, Christine G. Elsik<sup>j</sup>, Marie-Julie Fave<sup>d</sup>, Vilaiwan Fernandez<sup>d</sup>, Jürgen Gadau<sup>f</sup>, Joshua D. Gibson<sup>f</sup>, Dan Graur<sup>k</sup>, Kirk J. Grubbs<sup>f</sup>, Darren E. Hagen<sup>l</sup>, Martin Helmkamp<sup>f</sup>, Jo-Anne Holley<sup>l</sup>, Hao Hu<sup>c</sup>, Ana Sofia Ibarra Viniegra<sup>d</sup>, Brian R. Johnson<sup>m</sup>, Reed M. Johnson<sup>l</sup>, Abderrahman Khila<sup>d</sup>, Jay W. Kim<sup>a</sup>, Joseph Laird<sup>l</sup>, Kaitlyn A. Mathis<sup>m</sup>, Joseph A. Moeller<sup>g,h</sup>, Monica C. Munoz-Torres<sup>j</sup>, Marguerite C. Murphy<sup>n</sup>, Rin Nakamura<sup>a</sup>, Surabhi Nigam<sup>n</sup>, Rick P. Overson<sup>f</sup>, Jennifer E. Placek<sup>a</sup>, Rajendhran Rajakumar<sup>d</sup>, Justin T. Reese<sup>j</sup>, Hugh M. Robertson<sup>l,o</sup>, Chris R. Smith<sup>p</sup>, Andrew V. Suarez<sup>l,o</sup>, Garret Suen<sup>g,h</sup>, Elissa L. Suhr<sup>l</sup>, Shu Tao<sup>j</sup>, Candice W. Torres<sup>m</sup>, Ellen van Wilgenburg<sup>m</sup>, Lumi Viljakainen<sup>q</sup>, Kimberly K. O. Walden<sup>l</sup>, Alexander L. Wild<sup>l</sup>, Mark D. Yandell<sup>c</sup>, James A. Yorke<sup>r</sup>, Neil D. Tsutsui<sup>m\*</sup>

<sup>a</sup>Department of Biology, San Francisco State University, San Francisco, CA 94132; <sup>b</sup>Institute for Physical Science and Technology, University of Maryland, College Park, MD 20742; <sup>c</sup>Department of Human Genetics, Eccles Institute of Human Genetics, University Utah and School of Medicine, Salt Lake City, UT 84112; <sup>d</sup>McGill University, Department of Biology, 1205 Avenue Dr. Penfield, Montreal, Quebec, Canada, H3A 1B1; <sup>e</sup>Center for Integrative Genomics, Genopode Bldg., University of Lausanne, CH-1015 Lausanne, Switzerland; <sup>f</sup>School of Life Sciences, Arizona State University, Tempe, AZ 85287; <sup>g</sup>Department of Bacteriology, University of Wisconsin-Madison, Madison WI 53706; <sup>h</sup>DOE Great Lakes Bioenergy Research Center, University of Wisconsin-Madison, Madison, WI 53706; <sup>i</sup>The Johns Hopkins University School of Medicine, Baltimore, MD 21205; <sup>j</sup>Department of Biology, Georgetown University, Washington, DC 20057; <sup>k</sup>Department of Biology and Biochemistry, University of Houston, Houston, Texas 77204; <sup>l</sup>Department of Entomology, University of Illinois at Urbana-Champaign, Urbana, IL 61801; <sup>m</sup>Department of Environmental Science, Policy and Management, UC Berkeley, Berkeley, CA 94720-3114; <sup>n</sup>Department of Computer Science, San Francisco State University, San Francisco, CA 94132; <sup>o</sup>Institute of Genomic Biology, University of Illinois, Urbana 61801; <sup>p</sup>Department of Biology, Earlham College, Richmond, IN 47374; <sup>q</sup>Department of Molecular Biology and Genetics, Cornell University, NY; <sup>r</sup>Department of Mathematics, University of Maryland, College Park, MD 20742.

### **Project Coordination and Writing of Main Text:**

Christopher D. Smith<sup>a</sup>, Neil D. Tsutsui<sup>m</sup>

### **Sample Handling, Transcriptome & Genomic DNA Sequencing:**

Hugh M. Robertson<sup>l,o</sup>, Christopher D. Smith<sup>a</sup>, Neil D. Tsutsui<sup>m</sup>

### **Assembly:**

James A. Yorke<sup>r</sup>, Aleksey Zimin<sup>b</sup>, Christopher D. Smith<sup>a</sup>

### **Automated Annotation:**

Mark Yandell<sup>c</sup>, Carson Holt<sup>c</sup>, Hao Hu<sup>c</sup>

### **Gene Ontology, Inteprosan, & KEGG Analyses:**

Jennifer E. Placek<sup>a</sup>, Christopher D. Smith<sup>a</sup>

### **Cytoplasmic Ribosomal Protein Genes:**

Martin Helmkamp<sup>f</sup>

**Oxidative Phosphorylation Genes:**

Joshua D. Gibson<sup>d</sup>

**Repetitive Elements:**

Jay W. Kim<sup>a</sup>, Christopher D. Smith<sup>a</sup>

**Chemoreceptor Genes:**

Hugh Robertson<sup>l,o</sup>, Jo-Anne Holley<sup>l</sup>, Elisssa L. Suhr<sup>l</sup>, Andrew V. Suarez<sup>l,o</sup>, Kimberly K. O. Walden<sup>l</sup>, Alexander L. Wild<sup>l</sup>, Vincent Croset<sup>e</sup>, Richard Benton<sup>e</sup>

**P450 Genes:**

Reed Johnson<sup>l</sup>

**Olfactory Learning and Memory:**

Kaitlyn Mathis<sup>m</sup>, Brian R. Johnson<sup>m</sup>, Candice W. Torres<sup>m</sup>

**Opsins and Circadian Genes:**

Neil D. Tsutsui<sup>m</sup>

**Immune Genes:**

Lumi Viljakainen<sup>q</sup>, Kirk J. Grubbs<sup>f</sup>

**Behavior and Aggression Genes:**

Candice W. Torres<sup>m</sup>, Rin Nakamura<sup>a</sup>

**Hox Genes:**

Monica C. Munoz-Torres<sup>j</sup>, Darren Hagen<sup>j</sup>, Christine G. Elsik<sup>j</sup>

**Global Compositional Analysis:**

Eran Elhaik<sup>i</sup>, Justin T. Reese<sup>j</sup>, Dan Graur<sup>k</sup>, Christine G. Elsik<sup>j</sup>

**DNA Methylation Toolkit:**

Chris R. Smith<sup>p</sup>

**RNAi Pathway Genes:**

Shu Tao<sup>j</sup>, Monica C. Munoz-Torres<sup>j</sup>, Jennifer E. Placek<sup>a</sup>, Christopher D. Smith<sup>a</sup>, Christine G. Elsik<sup>j</sup>

**MicroRNAs:**

Darren E. Hagen<sup>j</sup>, Christine G. Elsik<sup>j</sup>

**Wing Polyphenism and Reproductive Division of Labor:**

Ehab Abouheif<sup>d</sup>, Marie-Julie Fave<sup>d</sup>, Vilaiwan Fernandes<sup>d</sup>, Rajendhran Rajakumar<sup>d</sup>, Ana Sofia Ibarra Viniegra<sup>d</sup>, Abderrahman Khila<sup>d</sup>

**Candidate Caste Determination Genes:**

Chris R. Smith<sup>p</sup>, Rajendhran Rajakumar<sup>d</sup>, Martin Helmkamp<sup>f</sup>, Garret Suen<sup>g,h</sup>, Cameron Currie<sup>g,h</sup>

**Yellow / Major Royal Jelly Protein Genes:**

Rick P. Overson<sup>f</sup>, Martin Helmkamp<sup>f</sup>

**Desaturase Genes:**

Elizabeth Cash<sup>f</sup>, Martin Helmkamp<sup>f</sup>

**Evolutionary Rate Analysis:**

Carson Holt<sup>c</sup>, Christopher D. Smith<sup>a</sup>

**Earlham College Evolutionary Genomics Class Annotation:**

Chris R. Smith<sup>p</sup> et al.

**Mitochondrial Genome Assembly:**

Joshua D. Gibson<sup>f</sup>, Chris R. Smith<sup>p</sup>

**SNP Analysis:**

Surabhi Nigam<sup>n</sup>, Marguerite C. Murphy<sup>n</sup>, Christopher D. Smith<sup>a</sup>

**Cuticular Hydrocarbon Analysis, Microsatellite genotyping, Behavioral assays:**

Ellen van Wilgenburg<sup>m</sup>

**Insulin Pathway Genes:**

Rajendhran Rajakumar<sup>d</sup>, Joseph A. Moeller<sup>g,h</sup>, Garret Suen<sup>g,h</sup>, Cameron R. Currie<sup>g,h</sup>

## SUPPLEMENTARY INFORMATION

### **Source material**

We collected an Argentine ant colony fragment (hereafter “Saratoga”) from a residential orchard in Saratoga, Santa Clara County, California, USA (N37° 15' 23.5"; W122° 00' 55.2").

Several lines of evidence confirmed that these ants are members of the large supercolony that dominates California. First, we conducted a genetic analysis of 12 workers at 13 microsatellite loci and estimated the genetic distances to 9 other *L. humile* populations (1). We genotyped 12 workers from the Saratoga at 13 polymorphic microsatellite loci (GenBank Accession numbers AF173164, AF093514, AF093515, AF093517, AF093520, AF093521, AF093522, AF093524, AF093525, AF093526, AF093527, AF093531, and AF093533) (2-4) and estimated the genetic distances of this population to nine other *L. humile* populations (1) according to Nei (5) using the computer program GenAIEx ([www.anu.edu.au/BoZo/GenAIEx/](http://www.anu.edu.au/BoZo/GenAIEx/)) (Table S14). The Saratoga population was genetically most similar to ants in Berkeley, California (Nei distance=0.037) that is part of the large Californian supercolony. Other genetically similar populations were those in Melbourne, Australia and the largest supercolony in Hawaii (Nei distances <0.1). The Saratoga ants were least similar to one of the smaller supercolonies in Hawaii, a supercolony in South Africa and a smaller supercolony from Lake Hodges, La Mesa, California (Nei distances all >0.26).

**Table S1. The number and types of sequencing runs performed.** The runs using DNA from a single diploid queen pupae and ~100 diploid workers from a single colony in the invasive range. Workers were pooled for a single DNA extraction. The same 3kb and 8kb paired end libraries were used for the 454 and Illumina sequencing.

| # runs | Sequencing platform    | Paired-end? | Source material            |
|--------|------------------------|-------------|----------------------------|
| 7      | 454FLX Titanium        | No          | Single queen pupa          |
| 1      | 454FLX Titanium        | Yes; 3kb    | ~100 workers               |
| 1      | 454FLX Titanium        | Yes; 8kb    | ~100 workers               |
| 1      | Illumina 84 cycle      | No          | ~100 workers               |
| 1      | Illumina               | Yes; 3kb    | ~100 workers               |
| 1      | Illumina               | Yes; 8kb    | ~100 workers               |
| 1      | 454FLX - transcriptome | No          | Mixed caste, age, location |

**Table S14. Genetic comparison (Nei genetic distance) between the sequenced *L. humile* population (Saratoga, CA) and nine other introduced populations.**

**Pairwise population matrix of Nei Genetic Distance**

|     | SAR   | AU    | B     | F     | HB    | HR    | J     | LH    | NZ    | SA    |
|-----|-------|-------|-------|-------|-------|-------|-------|-------|-------|-------|
| SAR | 0.000 |       |       |       |       |       |       |       |       |       |
| AU  | 0.071 | 0.000 |       |       |       |       |       |       |       |       |
| B   | 0.037 | 0.093 | 0.000 |       |       |       |       |       |       |       |
| F   | 0.110 | 0.115 | 0.051 | 0.000 |       |       |       |       |       |       |
| HB  | 0.094 | 0.150 | 0.161 | 0.206 | 0.000 |       |       |       |       |       |
| HR  | 0.424 | 0.423 | 0.452 | 0.482 | 0.356 | 0.000 |       |       |       |       |
| J   | 0.249 | 0.136 | 0.279 | 0.228 | 0.203 | 0.407 | 0.000 |       |       |       |
| LH  | 0.262 | 0.266 | 0.312 | 0.375 | 0.220 | 0.081 | 0.361 | 0.000 |       |       |
| NZ  | 0.118 | 0.094 | 0.132 | 0.137 | 0.164 | 0.372 | 0.108 | 0.280 | 0.000 |       |
| SA  | 0.314 | 0.267 | 0.341 | 0.442 | 0.411 | 0.412 | 0.454 | 0.335 | 0.372 | 0.000 |

**LEGEND**

**California, USA**

|                           |               |                |
|---------------------------|---------------|----------------|
| Saratoga (SAR)            | 37° 15' 24" N | 122° 00' 55" W |
| Berkeley (B)              | 37° 52' 22" N | 122° 15' 52" W |
| Lake Hodges (LH), La Mesa | 33° 3' 45" N  | 117° 7' 8" W   |

**France**

|               |               |               |
|---------------|---------------|---------------|
| Marseille (F) | 43° 29' 80" N | 05° 37' 41" W |
|---------------|---------------|---------------|

**Australia**

|                |               |                |
|----------------|---------------|----------------|
| Melbourne (AU) | 37° 47' 53" N | 144° 57' 32" W |
|----------------|---------------|----------------|

**New Zealand**

|                 |               |                |
|-----------------|---------------|----------------|
| Wellington (NZ) | 41° 28' 00" N | 174° 76' 00" W |
|-----------------|---------------|----------------|

**Japan**

|                             |            |             |
|-----------------------------|------------|-------------|
| Iwakuni City, Yamaguchi (J) | 34°06'15"N | 132°12'01"E |
|-----------------------------|------------|-------------|

**Hawaii, USA**

|                  |               |                |
|------------------|---------------|----------------|
| Kipuka Nene (HB) | 19° 13' 21" N | 155° 38' 04" W |
| KMC (HR)         | 19° 26' 01" N | 155° 16' 25" W |

**South Africa**

|                   |              |              |
|-------------------|--------------|--------------|
| Stellenbosch (SA) | 33° 3' 45" N | 117° 7' 8" W |
|-------------------|--------------|--------------|

Second, we performed standard aggression assays (1) to assay the colony-mate recognition behavior of the Saratoga ants. We collected *L. humile* workers from three Californian populations; Saratoga, Berkeley (which is part of the large supercolony that dominates California), and Lake Hodges (one of the smaller Californian supercolonies). Live ants were transported to the laboratory and maintained on a diet of sugar water, chicken egg and protein solution (modified LB broth). We performed standard behavioral assays to test for aggression between Saratoga and the other two populations. We observed the behavior of the ants for three minutes and scored the assay as aggressive if the ants showed one or more of the following behaviors; flaring of mandibles, recoil behavior, biting, or grabbing. These assays revealed no aggression between workers of the Saratoga population and the population in Berkeley (0 out of 20 trials). We did, however, find high levels of aggression between the Saratoga population and workers of the smaller supercolony from Lake Hodges, La Mesa, California (17 out of 20 trials).

Finally, we compared the cuticular hydrocarbon profiles of the Saratoga population to the Berkeley population and the smaller Lake Hodges colony (Fig. S17). Cuticular hydrocarbons are substances that are used by Argentine ants to distinguish colonymates from ants that belong to foreign colonies. We extracted cuticular hydrocarbons from individual workers from each of the populations used for the behavioral assays by immersing each ant in 45 mL of hexane for 10 minutes. Each worker's profile was analyzed separately, using gas chromatography and mass spectrometry (GC-MS). To detect quantitative differences in the

hydrocarbon patterns of our samples, we injected 1 mL of each sample into an Agilent 7890 GC equipped with a 190915-433 capillary column (30 m X 250 mm X 0.25 X m, Agilent Technologies). We used helium as carrier gas at 1 mL/min, the injector in splitless mode (1 min), and a temperature program of 2 min at 80 °C, to 270 °C at 20 °C/min, then to 310 °C at 3 °C/min (6). Injector temperature was set at 250°C. Electron

**Figure S17.** Cuticular hydrocarbon profiles of Argentine ant workers from the source location for this genome sequencing project (Saratoga, CA) and two other sites in the location for this genome sequencing project (Saratoga, CA) and two other sites in the introduced California range. Argentine ants at the Berkeley, CA site belong to the large supercolony that occupies the vast majority of the introduced range, whereas the Lake Hodges, CA population is spatially much smaller and is genetically, behaviorally and chemically distinct.

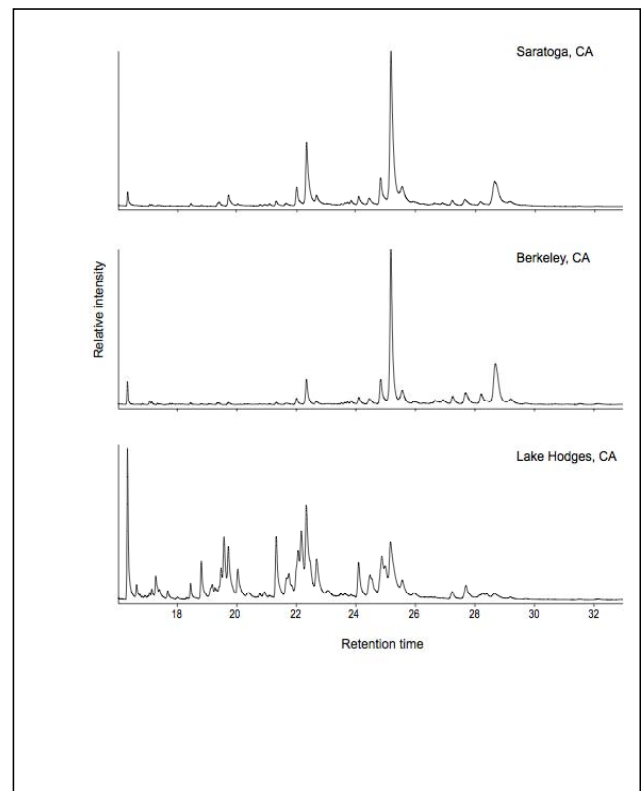



impact mass spectra were obtained with an ionization voltage of 70 eV and a source temperature of 250 °C.

Combined, these data indicate the Saratoga population is part of the large Californian supercolony.

### **RNA library preparation and EST sequencing**

EST sequencing was performed on material from a combination of different castes and life stages: adult workers, queens and males, larvae of mixed age and caste, queen pupae, worker pupae, and RNA from worker heads and antennae (to enrich for behavioral and chemoreception genes)(Table S1). Most of this material was collected from sites belonging to the large California supercolony, but we also generated and sequenced cDNA from workers collected in the native range (Argentina). We extracted and purified the polyA+ RNA using an Ambion MicroPurist RNA kit, reverse transcribed and generated cDNA using the Joint Genome Institute protocol, quantified each extraction separately for each type of source material, then mixed them together prior to sequencing. The cDNA was nebulized and used to generate a 400-800bp library, which was then sequenced using a Roche 454 Genome Sequencer LR70 FLX. This run yielded about 128Mb of DNA sequence. These reads assembled into 20,070 contigs.

Preparation of a 3kb and 8kb paired-end genomic libraries, emulsion-based clonal amplification and sequencing on the 454 Genome Sequencer FLX-Titanium system were performed according to the manufacturer's instructions (454 Life Sciences, Branford, CT). Each library was sequenced on one GS-Titanium 70x75 picotiter plate. Signal processing and base calling were performed using the bundled 454 Data Analysis Software version 2.0.00. The sequencing of the 3kb and 8kb paired-end genomic libraries

produced a total of 1,206,954 and 1,400,165 reads with average read-lengths of 382bp and 386bp, respectively.

## **Illumina Sequencing**

### *Shotgun Library construction and sequencing:*

A shotgun genomic library was constructed from 5ug of genomic DNA using the Genomic DNA Sample Prep kit from Illumina (San Diego, CA). The library was loaded at 12pM on two lanes of a flowcell and sequenced on a Genome Analyzer II for 76 cycles from one end of the fragments according to the manufacturer's instructions (Illumina, San Diego, CA). The yield from both lanes was 33.7 million reads with a read-length of 75bp and an estimated error rate of 0.49% (based on the alignment of PhiX control DNA run on one lane to the PHiX reference genome).

### *3kb and 8kb mate-pairs library construction*

These libraries were constructed according to the Illumina mate-pair sample preparation kit (Illumina, San Diego, CA) with one modification: the ends of the 3kb or 8kb fragments were ligated with a biotinylated linker so that, upon circularization, the ends of the 3kb or 8kb fragments are separated by this adaptor (5' TCGTATAACTTCGTATAATGTATGCTATACGAAGTTATTACG 3'). The libraries were loaded at a concentration of 12pM on one lane each and sequenced on a Genome Analyzer IIx for 76cycles on each end according to the manufacturer's protocol. The total numbers of reads were 19 million and 15 million for the 3kb and 8kb libraries, respectively. The error rate of the control DNA was 0.35% for each end.

## **Assembly**

We used the Roche gsAssembler Version 2.3 to generate the initial assembly of the genome using both 454 and Illumina data. Briefly, Illumina reads were trimmed to 70bp and a FASTA file was used as input to gsAssembler requiring a minimal contig length of 100bp and coverage of 5 reads. The assembly was run in ‘heterozygous’ mode since we were assembling a diploid genome.

We used CABOG assembler (7) to create the assembly employing the optional MER overlapper and BOG unitigger modules. The data was first pre-processed to detect the linker in the 454 paired end reads and convert them into regular mate pairs. Since Illumina sequencing 3kb and 8kb paired end reads were prepared using a 454 Titanium linker, they had to be screened for linker as well. We also trimmed off the low quality sequence. For the 454 data we relied on the clear ranges (coordinates of the start and end of the high-quality sequence on the reads) given in the SFF files. We trimmed Illumina data based on the quality scores supplied by the sequencer.

After eliminating the low quality sequences and linkers, the 454 data contained nearly 6M (million) unmated reads, with 376bp average trimmed length, and 1.6M mate pairs in 3kb and 8Kb mate pairs with ~200bp average trimmed read length. Given the 250.8Mb estimated genome size this data set has 9x coverage by the unmated reads, 2.5x sequence and 36x clone coverage by the 3kb and 8kb mate pairs. The Illumina data contained 40M unmated 72bp reads, and 55M mate pairs in 3kb and 8Kb mate pairs. Both Illumina mate pair libraries have 72 bases sequenced on each end of the clone. This data set had 12x coverage by the unmated reads.

We note that this data set had significant redundancy problems in the paired end 8kb libraries produced by both sequencing technologies. Redundancy means that when

the library was generated, multiple identical copies of each pair of mated reads were created. It was ultimately necessary to discard 66% of the 454 8kb mate pairs and 32% of the Illumina 8kb mate pairs due to redundancy. To filter out redundant mate pairs we first created a partial preliminary assembly. We did not run the scaffolding step for this assembly. We then examined mated read positions in contigs to detect the mate pairs whose inserts appeared to start and end within  $\pm 1$  base. We then eliminated all but one copy of each such redundant mate pair. Then we re-assembled the data to create the final assembly. Redundancy appears to be a problem in other projects and highlights the need for genome projects to test mate-paired libraries for redundancy using methods similar to those above or specialized tools such as 454 Replicate Filter)

<http://microbiomes.msu.edu/replicates/>) prior to assembly since these oversampled clones can skew the assembly process.

### **Annotation**

We used the automatic annotation pipeline MAKER (8) to annotate the genome of *L. humile*. MAKER generates high-quality annotations by taking into account evidence from multiple sources. MAKER first runs RepeatMasker ([www.repeatmasker.org](http://www.repeatmasker.org)) over the genome to find simple repeats, satellites and interspersed repeats. These sequences are masked prior to protein and EST sequence database searching and gene prediction. To annotate the *L. humile* genome, we used a database that combined RepeatMasker's insect library with novel *P. barbatus* and *L. humile* repeats identified in this study by RepeatModeler ([www.repeatmasker.org/RepeatModeler.html](http://www.repeatmasker.org/RepeatModeler.html)) and PILER (Table 1) (9).

MAKER was configured to use WU-BLAST (10) to align EST and protein evidence to the genome; the resulting alignments were then clustered and filtered to

remove redundant hits. BLAST hits with high sequence identity were realigned to the non-RepeatMasked genome with the splice-site aware algorithm Exonerate (11) to ensure that splice-sites were correct. Misaligned ESTs and genomic contaminants were removed by checking each alignment for valid splice donors and acceptors. Only validly spliced ESTs were used to inform the gene predictors; this greatly cuts down on false positives. EST data from related organisms was aligned using TBLASTX (10) and subjected to the same filtering procedures. The ESTs used for annotation were derived from Newbler assemblies of *L. humile* RNA-seq reads generated by the 454 platform. MAKER also used TBLASTX to align a combined set of Genbank (12) hymenoptera ESTs and *P. barbatus* ESTs. MAKER's protein evidence came from a protein database comprised of UniProtKB (13), the *D. melanogaster* proteome (Release 5.25) from FlyBase ([www.flybase.org](http://www.flybase.org)), the *Apis* and *Nasonia* proteomes from Genbank (12) and insect chemosensory proteins from Genbank.

Three *ab-initio* predictors were trained for use with MAKER: SNAP (14), Augustus (15), and GeneMark (16). GeneMark was trained using a 30Mb genomic scaffold from the *L. humile* assembly. Augustus (15) was trained using its self-training pipeline autoAug.pl together with the MAKER aligned EST evidence. We then ran MAKER with the evidence described above, using GeneMark and Augustus as predictors. From the resulting MAKER predictions, we chose 3,352 genes with the best annotation quality scores (17) and used them as a training set for SNAP. We then added the trained SNAP to the MAKER configuration and re-ran MAKER. MAKER revises gene predictions *post-facto*, adding UTRs and alternatively spliced transcripts as suggested by the EST evidence. It then measures their congruency with the protein and

EST evidence, based upon their Annotation Edit Distances (AED) (17), choosing the best gene model for each gene. These comprise a high confidence gene-set for downstream analyses (8). Predictions without support or less congruent with the evidence are retained as predictions.

After producing MAKER based genome annotations, we used the program InterProScan (18) to identify putative protein domains in *ab initio* gene predictions not overlapping MAKER annotations. *Ab initio* predictions that contained a recognizable InterPro protein domain were then added as gene models to an updated gene annotation set. We later filtered this updated annotation set for representation of likely repetitive elements using RepeatMasker (<http://repeatmasker.org>). RepeatMasker was run with the RepBase (19) repeat libraries in conjunction with a species specific repeat library prepared for *L. humile*, and the results were filtered to remove repetitive elements labeled “low complexity”, “simple repeat”, or having a RepeatMasker score of at less than 200. Finally, transcripts for which at least 50% of their length was identified as being repetitive were removed from the final annotation dataset.

Annotating the *L. humile* genome took roughly 8000 CPU hours using the distributed computer clusters at CHPC, University of Utah (<http://www.chpc.utah.edu>). In total we found 15,345 genes and generated another 29,206 gene-predictions that did not overlap EST or protein sequence alignments. In total, 855 new gene annotations were added to the final annotation set based on the presence of InterPro protein domains, and 23 of the original MAKER annotations were removed because of repeat filtering. The final dataset contained a total of 16,123 protein coding genes and 16,177 transcripts.

All gene annotations and supporting evidence alignments produced by MAKER

as well as protein domain information derived from InterProScan were loaded into a Chado (20) (<http://gmod.org/wiki/Chado>) database to facilitate community access to genome annotations and supporting evidence. The annotation curation tool Apollo (21) was then deployed to allow researchers to view and manually edit the genome annotations contained within the database (Table S2). Apollo allows users to connect to a Chado database remotely thereby providing researchers the ability to curate the genome annotations from distant locations. Apollo was configured as a Java Web Start Application for distribution to the community, which kept configuration of the program under the control of a central server and ensured a degree of consistency in the way data could be viewed and accessed.

For manual annotation, users selected reference genes from a well-curated species (i.e. *D. melanogaster*, *A. mellifera*, *N. vitripennis*) and identified the best matching MAKER gene model using BLASTP. Exon-by-exon alignment was used to refine intron-exon boundaries in Apollo to create a gene model that had splice sites consistent with all EST data and comparative BLAST evidence. Effort was made to annotate a protein matching the full length of the reference gene, when possible, and irregular features such as missing start codons, stop codons, gaps, and other anomalies were noted in the comment form of Apollo. Final gene models were confirmed by BLAST back to the reference gene set to confirm reciprocal best hits, and relevant synonyms of orthologs were recorded into the Chado database. Prediction sets and the OGS1.1 can be obtained through [http://HymenopteraGenome.org/linepithema/genome\\_consortium/datasets.html](http://HymenopteraGenome.org/linepithema/genome_consortium/datasets.html).

**Table S2.** Manually annotated genes. The following represents a list of manually curated genes as of the time of publication. The pathway, process, or predicted function of each gene is indicated as well as the *D. melanogaster* or other reference gene used to annotate the model. The MAKER identifiers are provided as the proposed name for each gene. Gustatory receptors (Grs) and Olfactory receptors (Ors) are listed separately in Tables S10 and S11, respectively.

| Process/Function                     | Drosophila Gene Name | Lhum MAKER Gene ID  |
|--------------------------------------|----------------------|---------------------|
| Aggression (inter-male)              | ade5                 | lhum_ade5-like      |
| Aggression (inter-male)              | eca                  | lhum_eclair         |
| Aggression (inter-male)              | ed                   | lhum_echinoid-like  |
| Aggression (inter-male)              | noc                  | lhum_no ocelli-like |
| Aggression (inter-male)              | sgl                  | lhum_sgl            |
| behavior                             | homer                | lhum_homer          |
| Biogenic amine receptor / GPCR       | DmDAMB/DopR2         | lhum_DopR2          |
| Biogenic amine receptor / GPCR       | DmDOP1               | lhum_DopR           |
| Caste Implicated - larval storage    | Hex110               | Lhum_Hex110         |
| Caste Implicated - larval storage    | Hex70a               | Lhum_Hex70a         |
| Caste Implicated - larval storage    | Hex70b               | Lhum_Hex70b         |
| Caste Implicated - larval storage    | Hex70c               | Lhum_Hex70c         |
| Caste Implicated - Nutrition Sensing | AKT                  | Lhum_AKT            |
| Caste Implicated - Nutrition Sensing | atg1                 | Lhum_atg1           |
| Caste Implicated - Nutrition Sensing | 4EBP                 | Lhum_4EBP           |
| Caste Implicated - Nutrition Sensing | EIF-4B               | Lhum_E1F4B          |
| Caste Implicated - Nutrition Sensing | lkb1                 | Lhum_lkb1           |
| Caste Implicated - Nutrition Sensing | Ilp                  | Lhumr_Ilp1          |
| Caste Implicated - Nutrition Sensing | Ilp                  | Lhum_Ilp2           |
| Caste Implicated - Nutrition Sensing | InR                  | Lhum_InR1           |
| Caste Implicated - Nutrition Sensing | InR                  | Lhum_InR2           |
| Caste Implicated - Nutrition Sensing | Mo25                 | Lhum_Mo25           |
| Caste Implicated - Nutrition Sensing | PDK1                 | Lhum_PDK1           |
| Caste Implicated - Nutrition Sensing | Pi3k21B              | Lhum_Pi3K21B        |
| Caste Implicated - Nutrition Sensing | PI3K59F              | Lhum_PI3K59F        |
| Caste Implicated - Nutrition Sensing | Pi3K68D              | Lhum_Pi3K68D        |
| Caste Implicated - Nutrition Sensing | Pi3K92E              | Lhum_Pi3K92E        |
| Caste Implicated - Nutrition Sensing | Raptor               | Lhum_Raptor         |
| Caste Implicated - Nutrition Sensing | Rheb                 | Lhum_Rheb           |
| Caste Implicated - Nutrition Sensing | Rector               | Lhum_rictor         |
| Caste Implicated - Nutrition Sensing | TOR                  | Lhum_Tor            |
| Caste Implicated -                   | SNF1A                | Lhum_SNF1A          |



|                                             |                |                    |
|---------------------------------------------|----------------|--------------------|
| Nutrition Sensing                           |                |                    |
| Caste Implicated - Nutrition Sensing        | TSC1           | Lhum_Tsc1          |
| Caste Implicated - Nutrition Sensing        | TSC2           | Lhum_Tsc2          |
| Caste Implicated Gene - yolk protein        | Vg             | Lhum_Yp1           |
| Cell Cycle Control                          | CDC42          | Lhum_CDC42         |
| Cell Cycle Control                          | CycB           | Lhum_CycB          |
| Chitinase                                   | CG5613         | Lhum_CG5613        |
| Chitinase                                   | CG7565         | Lhum_CG7565        |
| Chitinase                                   | Chit           | Not Found          |
| Chitinase                                   | Cht2           | Lhum_Cht2          |
| Chitinase                                   | Cht3           | Lhum_Cht3          |
| Chitinase                                   | Cht4           | Not Found          |
| Chitinase                                   | Cht5           | Lhum_Cht5          |
| Chitinase                                   | Cht6           | Lhum_Cht6          |
| Chitinase                                   | Cht7           | Lhum_Cht7          |
| Chitinase                                   | Cht8           | Lhum_Cht8          |
| Chitinase                                   | Cht9           | Not Found          |
| Chitinase                                   | Cht11          | Lhum_Cht11         |
| Chitinase                                   | Cht12          | Not Found          |
| Chitinase                                   | K06A9.1b       | Lhum_K06A9.1b      |
| Chitinase - Cation Binding                  | CG8460         | Lhum_CG8460        |
| Circadian                                   | clock          | lhum_clock         |
| Circadian                                   | cryptochrome 2 | lhum_cryptochrome2 |
| Circadian                                   | cycle          | lhum_cycle         |
| Circadian                                   | timeless       | lhum_timeless      |
| Cytoskeleton dynamics/morphology            | Rac1           | Lhum_Rac1          |
| Cytoskeleton dynamics/morphology            | Rho1           | Lhum_Rho1          |
| Desaturase (delta-9)                        | CG9747         | Lhum_CG9747_a      |
| Desaturase (delta-9)                        | CG9747         | Lhum_CG9747_b      |
| Desaturase (delta-9)                        | CG9747         | Lhum_CG9747_c      |
| Desaturase (delta-9)                        | CG9747         | Lhum_CG9747_d      |
| Desaturase (delta-9)                        | CG9747         | Lhum_CG9747_e      |
| Desaturase (delta-9)                        | CG9747         | Lhum_CG9747_f      |
| Desaturase (delta-9)                        | CG9747         | Lhum_CG9747_g      |
| Desaturase (delta-9)                        | CG9747         | Lhum_CG9747_h      |
| Desaturase (delta-9)                        | CG9747         | Lhum_CG9747_i      |
| Desaturase (delta-9)                        | CG9747         | Lhum_CG9747_j      |
| Desaturase (delta-9)                        | CG9747         | Lhum_CG9747_k      |
| Desaturase (delta-9)                        | CG9747         | Lhum_CG9747_l      |
| Desaturase (delta-9)                        | CG9747         | Lhum_CG9747_m      |
| Desaturase (delta-9)                        | CG9747         | Lhum_CG9747_n      |
| Desaturase (delta-9)                        | CG9747         | Lhum_CG9747_o      |
| Desaturase (delta-9)                        | CG9747         | Lhum_CG9747_p      |
| Desaturase (delta-9)                        | CG9747         | Lhum_desat_frag1   |
| Desaturase (delta-9)                        | CG9747         | Lhum_desat_frag7   |
| Desaturase (delta-9)                        | CG9747         | Lhum_desat_frag8   |
| Desaturase (delta-9)                        | CG9747         | Lhum_desat_frag9   |
| Desaturase (delta-9)                        | CG8630         | Lhum_CG8630_a      |
| Desaturase (delta-9)                        | CG8630         | Lhum_CG8630_b      |
| Desaturase (delta-9)                        | CG8630         | Lhum_CG8630_c      |
| Desaturase (delta-9)                        | CG8630         | Lhum_CG8630_d      |
| Desaturase (delta-9)                        | CG9743         | Lhum_CG9743        |
| Desaturase (delta-9)                        | CG15531        | Lhum_CG15531       |
| Desaturase (delta-9)                        | desat1         | Lhum_desat_frag2   |
| Desaturase (delta-9)                        | desat1         | Lhum_desat_frag3   |
| Desaturase (delta-9)                        | desat1         | Lhum_desat_frag4   |
| Desaturase (delta-9)                        | desat1         | Lhum_desat_frag5   |
| Desaturase (delta-9)                        | desat1         | Lhum_desat_frag6   |
| Desaturase (delta-9) - CHC alkene synthesis | desat1         | Lhum_desat1_a      |

|                                             |                   |                               |
|---------------------------------------------|-------------------|-------------------------------|
| Desaturase (delta-9) - CHC alkene synthesis | desat1            | Lhum_desat1_b                 |
| DNA methylation                             | Dnmt1             | Lhum_Dnmt1                    |
| DNA methylation                             | Dnmt2             | Lhum_Dnmt2                    |
| DNA methylation                             | Dnmt3             | Lhum_Dnmt3                    |
| EGF signaling                               | 26- argos         | lhum_argos                    |
| EGF signaling                               | 27- star S        | not found                     |
| EGF signaling                               | 28-keren krn      | lhum_keren                    |
| embryonic dev.                              | ecd               | Lhum_ecd                      |
| Embryonic Development - HOX                 | Abdominal A       | Lhum-Abd-A-like               |
| Embryonic Development - HOX                 | Abdominal B       | Lhum-Abd-B-like               |
| Embryonic Development - HOX                 | Antennapedia      | Lhum-Antp-like                |
| Embryonic Development - HOX                 | Deformed          | Lhum-Dfd-like                 |
| Embryonic Development - HOX                 | Fushi Tarazu      | Lhum-ftz-like                 |
| Embryonic Development - HOX                 | Hox3-A            | Lhum-Hox3-A-like              |
| Embryonic Development - HOX                 | Labial            | Lhum-lab-like                 |
| Embryonic Development - HOX                 | Proboscipedia     | Lhum-pb-like                  |
| Embryonic Development - HOX                 | Sex Combs Reduced | Lhum-Scr-like                 |
| Embryonic Development - HOX                 | Ultrabithorax     | Lhum-Ubx-like                 |
| Endocytosis                                 | Aux               | Lhum_Aux                      |
| Endocytosis                                 | Chc               | Lhum_Chc                      |
| Endocytosis                                 | Rab5              | Lhum_Rab5                     |
| Endocytosis                                 | Rab7              | Lhum_Rab7                     |
| Endocytosis                                 | Rab8              | Lhum_Rab8                     |
| Endocytosis                                 | Syt1              | Lhum_Syt1                     |
| errata                                      | CG16979           | lhum_CG16979                  |
| errata                                      | CG34424           | lhum_CG34424                  |
| Fertility                                   | Eggless           | lhum_egg                      |
| Fertility                                   | Ovarian tumor     | lhum_otu                      |
| Fertility                                   | Sans fille        | lhum_snf                      |
| Fertility                                   | Sex combs extra   | lhum_sce                      |
| Fertility                                   | Sex lethal        | lhum_sxl                      |
| Foraging                                    | for               | lhum_for_upstream/downstream* |
| glycolysis                                  | Ald               | Lhum_Ald                      |
| glycolysis                                  | Gapdh1            | Lhum_Gapdh1                   |
| glycolysis                                  | Hex-C             | Lhum_Hex-C                    |
| glycolysis                                  | Pfk               | Lhum_Pfk                      |
| glycolysis                                  | Pgi               | Lhum_Pgi                      |
| Heat shock response                         | Hsp 70Aa          | Lhum_Hsp70                    |
| Heme binding                                | c-cup             | Lhum_c-cup                    |
| Imaginal Disc Development                   | Idgf1             | Not Found                     |
| Imaginal Disc Development                   | Idgf2             | Not Found                     |
| Imaginal Disc Development                   | Idgf3             | Not Found                     |
| Imaginal Disc Development                   | Idgf4             | Lhum_Idgf4                    |
| Imaginal Disc Development                   | Idgf5             | Not Found                     |
| Immune Genes                                | 18w               | lhum_18w                      |
| Immune Genes                                | Atg12             | lhum_Atg12                    |
| Immune Genes                                | Atg5              | lhum_Atg5                     |
| Immune Genes                                | Atg7              | lhum_Atg7                     |
| Immune Genes                                | aub               | lhum_aub                      |
| Immune Genes                                | bsk               | lhum_bsk                      |
| Immune Genes                                | cact1             | lhum_cact1a                   |

|              |               |                    |
|--------------|---------------|--------------------|
| Immune Genes | cact1         | lhum_cact1b        |
| Immune Genes | cactin        | lhum_cactin        |
| Immune Genes | casp          | lhum_casp          |
| Immune Genes | CG11372       | lhum_galectin      |
| Immune Genes | CG32226       | lhum_galectin2     |
| Immune Genes | Dcr-2         | lhum_Dcr-2         |
| Immune Genes | Def           | lhum_def           |
| Immune Genes | dl            | lhum_dl            |
| Immune Genes | dome          | lhum_dome          |
| Immune Genes | Duox          | lhum_Duox          |
| Immune Genes | egr           | lhum_egr           |
| Immune Genes | FADD          | lhum_FADD          |
| Immune Genes | galectin 1    | lhum_galectin1     |
| Immune Genes | GNBP1         | lhum_GNBP1-1       |
| Immune Genes | GNBP1         | lhum_GNBP1-2       |
| Immune Genes | GNBP1         | lhum_GNBP1-2_like1 |
| Immune Genes | GNBP1         | lhum_GNBP1-2_like2 |
| Immune Genes | hop           | lhum_hop           |
| Immune Genes | hymenoptaecin | lhum_hymenoptaecin |
| Immune Genes | Iap2          | lhum_Iap2          |
| Immune Genes | IKKg          | lhum_IKKg          |
| Immune Genes | imd           | lhum_imd           |
| Immune Genes | Jra           | lhum_Jra           |
| Immune Genes | kay           | lhum_kay           |
| Immune Genes | Lys-2         | hum_Lys-2          |
| Immune Genes | Lys-3         | hum_Lys-3          |
| Immune Genes | Myd88         | lhum_MyD88         |
| Immune Genes | NA            | lhum_Naickin-1     |
| Immune Genes | NA            | lhum_Naickin-2a    |
| Immune Genes | NA            | lhum_Hisnavicin-3  |
| Immune Genes | NA            | lhum_Naickin-2b    |
| Immune Genes | NimA          | lhum_NimA          |
| Immune Genes | NimC1         | lhum_NimC          |
| Immune Genes | NOS           | lhum_NOS           |
| Immune Genes | PGRP-LC       | lhum_PGRP-LC       |
| Immune Genes | PGRP-LC       | lhum_PGRP-LC_like  |
| Immune Genes | PGRP-S1       | lhum_PGRP-S1       |
| Immune Genes | PGRP-S2       | lhum_PGRP-S2a      |
| Immune Genes | PGRP-S2       | lhum_PGRP-S2b      |
| Immune Genes | PGRP-SA       | lhum_PGRP-SA       |
| Immune Genes | Pli           | lhum_Pli           |
| Immune Genes | pll           | lhum_pll           |
| Immune Genes | PPO           | lhum_PPO           |
| Immune Genes | Rel           | lhum_Rel           |
| Immune Genes | Rpn3          | lhum_Rpn3          |
| Immune Genes | SCR-B10       | lhum_SCR-B10       |
| Immune Genes | SCR-B2        | lhum_SCR-B2        |
| Immune Genes | SCR-B5        | lhum_SCR-B5        |
| Immune Genes | SCR-B9        | lhum_SCR-B9        |
| Immune Genes | SCR-C         | lhum_SCR-C         |
| Immune Genes | serpin-1      | lhum_Serpin-1      |
| Immune Genes | Serpin-3      | lhum_Serpin-3      |
| Immune Genes | Serpin-4      | lhum_Serpin-4      |
| Immune Genes | serpin-5      | lhum_Serpin-5      |
| Immune Genes | SP1           | lhum_SP1a          |
| Immune Genes | SP1           | lhum_SP1b          |
| Immune Genes | SP14          | lhum_SP14          |
| Immune Genes | SP2           | lhum_SP2           |
| Immune Genes | SP30          | lhum_SP30          |
| Immune Genes | SP46          | lhum_SP46          |
| Immune Genes | SP49          | lhum_SP49          |
| Immune Genes | spz1          | lhum_spz1          |
| Immune Genes | spz2          | lhum_spz2          |
| Immune Genes | spz4          | lhum_spz4          |
| Immune Genes | spz5          | lhum_spz5          |
| Immune Genes | spz6          | lhum_spz6          |

|                          |                                                   |                                   |
|--------------------------|---------------------------------------------------|-----------------------------------|
| Immune Genes             | Stat92E                                           | lhum_Stat92E                      |
| Immune Genes             | Tab2                                              | lhum_Tab2                         |
| Immune Genes             | Tak1                                              | lhum_Tak1                         |
| Immune Genes             | TEP7                                              | lhum_TEP7                         |
| Immune Genes             | TEPA                                              | lhum_TEPA                         |
| Immune Genes             | TepIII                                            | lhum_TepIII                       |
| Immune Genes             | Toll-1                                            | lhum_Toll-1a                      |
| Immune Genes             | Toll-1                                            | lhum_Toll-1b                      |
| Immune Genes             | Toll-10                                           | lhum_Toll-10                      |
| Immune Genes             | Toll-6                                            | lhum_Toll-6                       |
| Immune Genes             | Toll-8                                            | lhum_Toll-8                       |
| Immune Genes             | Traf1                                             | lhum_Traf1                        |
| Immune Genes             | Traf6                                             | lhum_Traf6                        |
| Immune Genes             | tub                                               | lhum_tub                          |
| juvenile hormone         | jhamt                                             | Lhum_jhamt                        |
| juvenile hormone         | jhe                                               | Lhum_jhe                          |
| Larval cuticle formation | GMCOX2                                            | Lhum_GMCOX2                       |
| larval development       | amon                                              | Lhum_amon                         |
| learning and mem         | 14-3-3zeta                                        | lhum_14-3-3zeta                   |
| Learning or memory       | S6kII                                             | lhum_S6kII-like                   |
| Memory                   | 14-3-3epsilon                                     | lhum_14-3-3epsilon                |
| Memory                   | aPKC                                              | lhum_aPKC                         |
| Memory                   | As                                                | lhum_ubiquitin protein ligase E3A |
| Memory                   | CaMKII                                            | lhum_CaMKII                       |
| Memory                   | cer                                               | no ortholog                       |
| Memory                   | CrebB-17A                                         | lhum_creb                         |
| Memory                   | Ddc                                               | lhum_Ddc                          |
| Memory                   | dgs                                               | lhum_dgs                          |
| Memory                   | dnc                                               | lhum_dnc                          |
| Memory                   | drk                                               | lhum_drk                          |
| Memory                   | eag                                               | lhum_eag                          |
| Memory                   | eas                                               | lhum_eas-like                     |
| Memory                   | exba                                              | lhum_exba                         |
| Memory                   | Gld2                                              | lhum_Gld2-like                    |
| Memory                   | per                                               | lhum_per                          |
| Memory                   | Phm                                               | lhum_cytochrome P450-like         |
| Memory                   | pum                                               | lhum_pumilio-like                 |
| Memory                   | sbr                                               | lhum_small bristles-like          |
| Memory                   | stau                                              | lhum_stau-like                    |
| Memory                   | Tbh                                               | lhum_tbh                          |
| Memory                   | Tequila                                           | lhum_tequila-like                 |
| Memory                   | w                                                 | lhum_white                        |
| Memory                   | yu                                                | lhum_yu-like                      |
| methyl binding protein   | mbd2                                              | lhum_mbd2                         |
| miRNA                    | 67 distinct orthologs                             |                                   |
| mushr. body dev          | mbt                                               | lhum_mbt                          |
| nervous sys dev.         | shd                                               | Lhum_shd                          |
| nuclear transport        | Ran                                               | Lhum_Ran                          |
| Olfactory Learning       | 14-3-3zeta                                        | lhum_14-3-3zeta                   |
| Olfactory Learning       | cher / cheerio                                    | lhum_cher                         |
| Olfactory Learning       | dikar                                             | lhum_dikar-like                   |
| Olfactory Learning       | Fas2 / Fasciclin 2                                | lhum_Fas2                         |
| Olfactory Learning       | Fas3 / Fasciclin 3                                | lhum_Fas3-like                    |
| Olfactory Learning       | futsch                                            | lhum_futsch-like                  |
| Olfactory Learning       | gclm / Glutamate-cysteine ligase modifier subunit | lhum_gclm                         |
| Olfactory Learning       | gp210                                             | lhum_gp210                        |
| Olfactory Learning       | gry / gryzun                                      | lhum_gry                          |
| Olfactory Learning       | klignon                                           | lhum_klignon-like                 |
| Olfactory Learning       | lat / latheo                                      | lhum_lat                          |
| Olfactory Learning       | ltd / lightoid                                    | lhum_ltd-like                     |
| Olfactory Learning       | mnb / minibrain                                   | lhum_mnb-like                     |
| Olfactory Learning       | mob2                                              | lhum_mob2-like                    |

|                    |                                           |                                    |
|--------------------|-------------------------------------------|------------------------------------|
| Olfactory Learning | mol / moladietz                           | lhum_mol                           |
| Olfactory Learning | mura / murashka                           | lhum_mura-like                     |
| Olfactory Learning | nf1 / Neurofibromin 1                     | lhum_Nf1                           |
| Olfactory Learning | NMDA receptor 1                           | lhum_NMDA Receptor 1               |
| Olfactory Learning | nord                                      | lhum_nord-like                     |
| Olfactory Learning | pigeon                                    | pbar_pigeon                        |
| Olfactory Learning | pka-C1                                    | lhum_cAMP-dependent protein kinase |
| Olfactory Learning | pka-R1 / cAMP-dependent protein kinase R1 | lhum_Pka_R1                        |
| Olfactory Learning | Pp1-87B                                   | pbar_Pp1                           |
| Olfactory Learning | pst / pastrel                             | lhum_pastrel-like                  |
| Olfactory Learning | rad / radish                              | lhum_radish-like                   |
| Olfactory Learning | rho / rhomboid                            | lhum_rhomboid-like                 |
| Olfactory Learning | rogdi                                     | lhum_rogdi                         |
| Olfactory Learning | sarah                                     | lhum_sra                           |
| Olfactory Learning | scb / scab                                | lhum_scab-like                     |
| Olfactory Learning | sgg / shaggy                              | lhum_sgg-like                      |
| Olfactory Learning | shi / shibire                             | lhum_shibire                       |
| Olfactory Learning | shn / schnurri                            | lhum_shn-like                      |
| Olfactory Learning | supernumerary limbs                       | lhum_slmb                          |
| Olfactory Learning | trp / transient receptor potential        | lhum_trp-like                      |
| Olfactory Learning | tun / tungus                              | lhum_tungus                        |
| OXPHOS             | ACPM                                      | Lhum_Ndubaf1_like                  |
| OXPHOS             | AT91                                      | Lhum_Atp5g2_like                   |
| OXPHOS             | ATP5E                                     | Lhum_Atp5e_like                    |
| OXPHOS             | ATPA                                      | Lhum_Atp5a1                        |
| OXPHOS             | ATPB                                      | Lhum_Atp5b_like                    |
| OXPHOS             | ATPD                                      | Lhum_Atp5d_like                    |
| OXPHOS             | ATPF                                      | Lhum_Atp5f1_like                   |
| OXPHOS             | ATPG                                      | Lhum_Atp5c1_like                   |
| OXPHOS             | ATPJ                                      | Lhum_Atp5i_like                    |
| OXPHOS             | ATPK                                      | Lhum_Atp5j2_like                   |
| OXPHOS             | ATPN                                      | Lhum_Atp5l_like                    |
| OXPHOS             | ATPO                                      | Lhum_Atp5o_like                    |
| OXPHOS             | ATPQ                                      | Lhum_Atp5h_like                    |
| OXPHOS             | ATPR                                      | Lhum_Atp5j_like                    |
| OXPHOS             | C560                                      | Lhum_SdhC_like                     |
| OXPHOS             | CG8728                                    | Lhum_Pmpca_like                    |
| OXPHOS             | COX4                                      | Lhum_Cox4i1_like                   |
| OXPHOS             | COX5A                                     | Lhum_Cox5a_like                    |
| OXPHOS             | COX5B                                     | Lhum_Cox5b_like                    |
| OXPHOS             | COX6A                                     | Lhum_Cox6a1_like_A                 |
| OXPHOS             | COX6A                                     | Lhum_Cox6a1_like_B                 |
| OXPHOS             | COX6B                                     | Lhum_Cox6b1_like_A                 |
| OXPHOS             | COX6B                                     | Lhum_Cox6b1_like_B                 |
| OXPHOS             | COX6C                                     | Lhum_Cox6c_like                    |
| OXPHOS             | COX7C                                     | Lhum_Cox7c_like                    |
| OXPHOS             | CY1                                       | Lhum_Cyc1_like_a                   |
| OXPHOS             | CY1                                       | Lhum_Cyc1_like_b                   |
| OXPHOS             | DHSA                                      | Lhum_Sdha_A                        |
| OXPHOS             | DHSA                                      | Lhum_Sdha_like_B                   |
| OXPHOS             | DHSB                                      | Lhum_SdhB_like_A                   |
| OXPHOS             | DHSB                                      | Lhum_SdhB_like_B                   |
| OXPHOS             | DHSD                                      | Lhum_SdhD_like                     |
| OXPHOS             | N4AM                                      | Lhum_Ndufa7_like                   |
| OXPHOS             | N4BM                                      | Lhum_Ndufc2_like                   |
| OXPHOS             | N5BM                                      | Lhum_Ndufa11_like                  |
| OXPHOS             | N7BM                                      | Lhum_Ndufa12_like                  |
| OXPHOS             | N7BM                                      | Lhum_Ndufa12_pseudo                |
| OXPHOS             | NB2M                                      | Lhum_Ndufb3_like                   |
| OXPHOS             | NB4M                                      | Lhum_Ndufa6_like                   |

|                                         |                                 |                     |
|-----------------------------------------|---------------------------------|---------------------|
| OXPHOS                                  | NB5M                            | Lhum_Ndufb4_like    |
| OXPHOS                                  | NB6M                            | Lhum_Ndufa13_like   |
| OXPHOS                                  | NB7M                            | Lhum_Ndufb6_like    |
| OXPHOS                                  | NB8M                            | Lhum_Ndufb7_like    |
| OXPHOS                                  | NI2M                            | Lhum_Ndufb9_like    |
| OXPHOS                                  | NI8M                            | Lhum_Ndufa2_like    |
| OXPHOS                                  | NIAM                            | Lhum_Ndufb8_like    |
| OXPHOS                                  | NIDM                            | Lhum_Ndufb10_like   |
| OXPHOS                                  | NIGM                            | Lhum_Ndufb2_like    |
| OXPHOS                                  | NIMM                            | Lhum_Ndufa1_like    |
| OXPHOS                                  | NINM                            | Lhum_Ndufb1_like    |
| OXPHOS                                  | NIPM                            | Lhum_Ndufs5_like    |
| OXPHOS                                  | NISM                            | Lhum_Ndufb5_like    |
| OXPHOS                                  | NUAM                            | Lhum_Ndufs1         |
| OXPHOS                                  | NUBM                            | Lhum_Ndufv1_like_a  |
| OXPHOS                                  | NUCM                            | Lhum_Ndufs2_like    |
| OXPHOS                                  | NUDM                            | Lhum_Ndufa10_like   |
| OXPHOS                                  | NUEM                            | Lhum_Ndufa9_like    |
| OXPHOS                                  | NUFM                            | Lhum_Ndufa5_like    |
| OXPHOS                                  | NUGM                            | Lhum_Ndufs3_like    |
| OXPHOS                                  | NUHM                            | Lhum_Ndufv2_like    |
| OXPHOS                                  | NUIM                            | Lhum_Ndufs8_like    |
| OXPHOS                                  | NUKM                            | Lhum_Ndufs7_like    |
| OXPHOS                                  | NUML                            | Lhum_Ndufa4_like    |
| OXPHOS                                  | NUMM                            | Lhum_Ndufs6_like    |
| OXPHOS                                  | NUPM                            | Lhum_Ndufa8_like    |
| OXPHOS                                  | NUYM                            | Lhum_Ndufs4_like    |
| OXPHOS                                  | UCR1                            | Lhum_Pmpcb_like     |
| OXPHOS                                  | UCR2                            | Lhum_Uqerc2_like    |
| OXPHOS                                  | UCR6                            | Lhum_Uqerb_like     |
| OXPHOS                                  | UCRH                            | Lhum_Uqerh_like     |
| OXPHOS                                  | UCRI                            | Lhum_Uqcrfs1_like_A |
| OXPHOS                                  | UCRI                            | Lhum_Uqcrfs1_like_B |
| OXPHOS                                  | UCRQ                            | Lhum_Uqerc2_like_a  |
| OXPHOS                                  | UCRQ                            | Lhum_Uqerq_like     |
| OXPHOS                                  | UCRX                            | Lhum_Uqer10_like_a  |
| OXPHOS                                  | UCRX                            | Lhum_Uqer10_like_b  |
| OXPHOS                                  | UCRY                            | Lhum_Uqer11_like    |
| OXPHOS                                  | Vha55                           | Lhum_Atp12a         |
| OXPHOS                                  | Vha68                           | Lhum_Atp6v1a        |
| pigmentation                            | Pink                            | Lhum_Pink           |
| protein coding                          | cappuccino                      | lhum_capu           |
| protein coding                          | maleless                        | lhm_mle             |
| protein coding                          | nemy                            | lhum_nemy           |
| protein coding                          | Pdk                             | Lhum_Pdk            |
| protein coding                          | Rap                             | Lhum_Rap            |
| protein coding/cholinergic receptor     | nAChRa1                         | Lhum_nAChRa1        |
| protein coding/GPCR                     | mGlutR1                         | Lhum_mGlutR1        |
| protein coding/GPCR                     | Rab 6                           | Lhum_rab6           |
| protein coding/RTK                      | EphR                            | Lhum_Eph            |
| protein folding                         | Cnx99a                          | Lhum_Cnx99a-1       |
| protein folding                         | Gp 93                           | Lhum_GP93           |
| protein folding                         | PDI                             | Lhum_PDI-1          |
| Protein kinase                          | Asator                          | Lhum_Asator         |
| protein kinase                          | Fak56D                          | Lhum_Fak56D         |
| ras protein signal transduction         | f-cup                           | Lhum_f-cup          |
| Regulation of Ca +2 dependent processes | Cam/ Calmodulin                 | lhum_cam            |
| REPRODUCTION DNA Damage/TE              | Armi, Armitage                  | lhum_armi           |
| REPRODUCTION DNA Damage/TE              | ATM, Ataxia-telangiectasia gene | lhum_ATM            |
| REPRODUCTION                            | ATR, Ataxia                     | lhum_ATR            |

|                              |                                                    |                         |
|------------------------------|----------------------------------------------------|-------------------------|
| DNA Damage/TE                | telangiectasia and Rad3-related gene               |                         |
| REPRODUCTION DNA Damage/TE   | Chk2, Checkpoint kinase 2 or Loki                  | lhum_loki               |
| REPRODUCTION DNA Damage/TE   | CK2beta; casein kinase II beta                     | lhum_CK2beta            |
| REPRODUCTION DNA Damage/TE   | Csul, Capsuleen                                    | lhum_csul               |
| REPRODUCTION DNA Damage/TE   | Cuff, Cutoff or Dom3Z                              | lhum_Dom3Z              |
| REPRODUCTION DNA Damage/TE   | eIF5b, eukaryotic translation initiation factor 5b | lhum EIF5b              |
| REPRODUCTION DNA Damage/TE   | Gbb; glass bottom boat/ protein 60A                | lhum_gbb                |
| REPRODUCTION DNA Damage/TE   | Hen1, Hua enhancer 1 or pimet;                     | lhum_pimet              |
| REPRODUCTION DNA Damage/TE   | HP1, heterochromatin protein 1                     | lhum_HP1-like           |
| REPRODUCTION DNA Damage/TE   | Hsp90/ Dmel Hsp83                                  | lhum_hsp90A lhum_hsp90B |
| REPRODUCTION DNA Damage/TE   | PIWI, P-element-induced wimpy testis               | Lhum_Piwi-like          |
| REPRODUCTION DNA Damage/TE   | Spn-E, Spindle-E                                   | lhum_SpnE               |
| REPRODUCTION DNA Damage/TE   | Stam; Signal transducing adaptor molecule          | lhum_stam               |
| REPRODUCTION DNA Damage/TE   | Tf, Traffic Jam                                    | lhum_trafficjam         |
| REPRODUCTION DNA Damage/TE   | Tud, Tudor protein;                                | lhum_tud                |
| REPRODUCTION DNA Damage/TE   | Zuc, Zucchini                                      | lhum_zuc                |
| REPRODUCTION Maternal Determ | 6-Vasa                                             | Lhum_Vasa-like-RB       |
| Ribosomal Protein            | RACK1                                              | lhum_Rack1              |
| Ribosomal Protein            | RpL10                                              | lhum_RpL10              |
| Ribosomal Protein            | RpL10Ab                                            | lhum_RpL10A             |
| Ribosomal Protein            | RpL11                                              | lhum_RpL11              |
| Ribosomal Protein            | RpL12                                              | lhum_RpL12              |
| Ribosomal Protein            | RpL13                                              | lhum_RpL13              |
| Ribosomal Protein            | RpL13A                                             | lhum_RpL13A             |
| Ribosomal Protein            | RpL14                                              | lhum_RpL14              |
| Ribosomal Protein            | RpL15                                              | lhum_RpL15              |
| Ribosomal Protein            | RpL17                                              | lhum_RpL17              |
| Ribosomal Protein            | RpL18                                              | lhum_RpL18              |
| Ribosomal Protein            | RpL18A                                             | lhum_RpL18A             |
| Ribosomal Protein            | RpL19                                              | lhum_RpL19              |
| Ribosomal Protein            | RpL21                                              | lhum_RpL21              |
| Ribosomal Protein            | RpL22                                              | lhum_RpL22              |
| Ribosomal Protein            | RpL23                                              | lhum_RpL23              |
| Ribosomal Protein            | RpL23A                                             | lhum_RpL23A             |
| Ribosomal Protein            | RpL24                                              | lhum_RpL24              |
| Ribosomal Protein            | RpL24-like                                         | lhum_RpL24-like         |
| Ribosomal Protein            | RpL26                                              | lhum_RpL26              |
| Ribosomal Protein            | RpL27                                              | lhum_RpL27              |
| Ribosomal Protein            | RpL27A                                             | lhum_RpL27A             |
| Ribosomal Protein            | RpL28                                              | lhum_RpL28              |
| Ribosomal Protein            | RpL29                                              | lhum_RpL29              |
| Ribosomal Protein            | RpL3                                               | lhum_RpL3               |
| Ribosomal Protein            | RpL30                                              | lhum_RpL30              |
| Ribosomal Protein            | RpL31                                              | lhum_RpL31              |
| Ribosomal Protein            | RpL32                                              | lhum_RpL32              |

|                   |            |                 |
|-------------------|------------|-----------------|
| Ribosomal Protein | RpL34a     | lhum_RpL34      |
| Ribosomal Protein | RpL35      | lhum_RpL35      |
| Ribosomal Protein | RpL35A     | lhum_RpL35A     |
| Ribosomal Protein | RpL36      | lhum_RpL36      |
| Ribosomal Protein | RpL36A     | lhum_RpL36A     |
| Ribosomal Protein | RpL37a     | lhum_RpL37      |
| Ribosomal Protein | RpL37A     | lhum_RpL37A     |
| Ribosomal Protein | RpL38      | lhum_RpL38      |
| Ribosomal Protein | RpL39      | lhum_RpL39      |
| Ribosomal Protein | RpL4       | lhum_RpL4       |
| Ribosomal Protein | RpL40      | lhum_RpL40      |
| Ribosomal Protein | RpL41      | lhum_RpL41      |
| Ribosomal Protein | RpL5       | lhum_RpL5       |
| Ribosomal Protein | RpL6       | lhum_RpL6       |
| Ribosomal Protein | RpL7       | lhum_RpL7       |
| Ribosomal Protein | RpL7A      | lhum_RpL7A      |
| Ribosomal Protein | RpL8       | lhum_RpL8       |
| Ribosomal Protein | RpL9       | lhum_RpL9       |
| Ribosomal Protein | RpLP0      | lhum_RpLP0      |
| Ribosomal Protein | RpLP0-like | lhum_RpLP0-like |
| Ribosomal Protein | RpLP1      | lhum_RpLP1      |
| Ribosomal Protein | RpLP2      | lhum_RpLP2      |
| Ribosomal Protein | RpS10b     | lhum_RpS10      |
| Ribosomal Protein | RpS11      | lhum_RpS11      |
| Ribosomal Protein | RpS12      | lhum_RpS12      |
| Ribosomal Protein | RpS13      | lhum_RpS13      |
| Ribosomal Protein | RpS14a     | lhum_RpS14      |
| Ribosomal Protein | RpS15      | lhum_RpS15      |
| Ribosomal Protein | RpS15Aa    | lhum_RpS15A     |
| Ribosomal Protein | RpS16      | lhum_RpS16a     |
| Ribosomal Protein | RpS16      | lhum_RpS16b     |
| Ribosomal Protein | RpS17      | lhum_RpS17      |
| Ribosomal Protein | RpS18      | lhum_RpS18      |
| Ribosomal Protein | RpS19a     | lhum_RpS19      |
| Ribosomal Protein | RpS2       | lhum_RpS2       |
| Ribosomal Protein | RpS20      | lhum_RpS20      |
| Ribosomal Protein | RpS21      | lhum_RpS21      |
| Ribosomal Protein | RpS23      | lhum_RpS23a     |
| Ribosomal Protein | RpS23      | lhum_RpS23b     |
| Ribosomal Protein | RpS24      | lhum_RpS24      |
| Ribosomal Protein | RpS25      | lhum_RpS25      |
| Ribosomal Protein | RpS26      | lhum_RpS26      |
| Ribosomal Protein | RpS27      | lhum_RpS27      |
| Ribosomal Protein | RpS27A     | lhum_RpS27A     |
| Ribosomal Protein | RpS28b     | lhum_RpS28a     |
| Ribosomal Protein | RpS28b     | lhum_RpS28b     |
| Ribosomal Protein | RpS29      | lhum_RpS29      |
| Ribosomal Protein | RpS3       | lhum_RpS3       |
| Ribosomal Protein | RpS30      | lhum_RpS30a     |
| Ribosomal Protein | RpS30      | lhum_RpS30b     |
| Ribosomal Protein | RpS3A      | lhum_RpS3A      |
| Ribosomal Protein | RpS4       | lhum_RpS4       |
| Ribosomal Protein | RpS5a      | lhum_RpS5       |
| Ribosomal Protein | RpS6       | lhum_RpS6       |
| Ribosomal Protein | RpS7       | lhum_RpS7       |
| Ribosomal Protein | RpS8       | lhum_RpS8       |
| Ribosomal Protein | RpS9       | lhum_RpS9       |
| Ribosomal Protein | RpSA       | lhum_RpSA       |
| RNAi Pathway      | AGO1       | lhum_AGO1       |
| RNAi Pathway      | AGO2       | lhum_AGO2       |
| RNAi Pathway      | AGO3       | lhum_AGO3       |
| RNAi Pathway      | dcr1       | lhum_dcr1       |
| RNAi Pathway      | drosha     | lhum_drosha     |
| RNAi Pathway      | loqs       | lhum_loqs       |
| RNAi Pathway      | pasha      | lhum_pasha      |
| RNAi Pathway      | Belle      | Lhum_Belle-like |



|                           |                          |                         |
|---------------------------|--------------------------|-------------------------|
| RNAi Pathway              | Elp1                     | Lhum_Elp1-like          |
| RNAi Pathway              | Embargoed                | Lhum_Crm1-like          |
| RNAi Pathway              | Exportin 5               | Lhum_Xpo5-like          |
| RNAi Pathway              | Fmr1                     | Lhum_Fmr1-like          |
| RNAi Pathway              | Loqs2                    | Lhum_Loqs2-like         |
| RNAi Pathway              | Pros45                   | Lhum_Pros45-like        |
| RNAi Pathway              | R2D2                     | Lhum_similar-to-R2D2    |
| RNAi Pathway              | Sid1                     | Lhum_Sid1-like          |
| RNAi Pathway              | Translin                 | Lhum_Trnsn-like         |
| RNAi Pathway              | Trax                     | Lhum_Trax-like          |
| RNAi Pathway              | VIG                      | Lhum_VIG-like           |
| Serotonic Transporter     | dme1_SerT                | lhum_SerT               |
| signaling pathways        | L(2)TID                  | Lhum_l(2)tid            |
| unfolded protein response | ATF6                     | Lhum_ATF6-1             |
| unfolded protein response | IRE1                     | Lhum_IRE-1-1            |
| unfolded protein response | XBP-1                    | Lhum_XBP-1-1            |
| Vesicular Transport       | Arf2                     | Lhum_Arf2               |
| Vision                    | blue opsin               | lhum_blueopsin          |
| Vision                    | long wavelength opsin 1  | lhum_LWopsin1           |
| Vision                    | long wavelength opsin 2  | lhum_LWopsin2           |
| Vision                    | pteropsin-like           | lhum_pteropsin-like     |
| Vision                    | UV opsin                 | lhum_UVopsin            |
| WBSR gene                 | hsap_EIF4H               | lhum_EIF4H_like         |
| WBSR gene                 | hsap_LAT2                | lhum_LAT2_like          |
| WBSR gene                 | hsap_LIMK1               | lhum_LIMK1_like         |
| WBSR gene                 | hsap_STX1A               | lhum_STX1A_like         |
| WBSR gene                 | hsap_TBL2                | lhum_TBL2_like          |
| WBSR gene                 | hsap_WBSR16              | lhum_WBSR16_like        |
| WBSR gene                 | hsap_WBSR22              | lhum_WBSR22_like        |
| WBSR genes                | hsap_ABHD11              | lhum_ABHD11_like        |
| WBSR genes                | hsap_BAZ1B               | lhum_BAZ1B_like         |
| WBSR genes                | hsap_BCL7B               | lhum_BCL7B_like         |
| WBSR genes                | hsap_CLIP2               | lhum_CLIP2_like         |
| WBSR genes                | hsap_FKBP6               | lhum_FKBP6_like         |
| WBSR genes                | hsap_HIP1                | lhum_HIP1_like          |
| WBSR genes                | hsap_PMS2                | lhum_PMS2_like          |
| WBSR genes                | hsap_RFC2                | lhum_RFC2_like          |
| WBSR genes                | hsap_STAG3               | lhum_STAG3_like         |
| WING-A/P pattern          | 10-decapentaplegic       | lhum_dpp                |
| WING-A/P pattern          | 11-hedgehog              | lhum_hedgehog           |
| WING-A/P pattern          | 12-thickveins            | lhum_thickveins         |
| WING-A/P pattern          | 13-daughters against dpp | lhum_dad                |
| WING-A/P pattern          | 14-mothers against dpp   | lhum_mad                |
| WING-A/P pattern          | 15-smoothened            | lhum_smoothened         |
| WING-A/P pattern          | 16-knirps                | lhum_knirps             |
| WING-A/P pattern          | 17-baboon                | lhum_baboon             |
| WING-A/P pattern          | 19-punt                  | lhum_punt               |
| WING-A/P pattern          | 1-brinker                | lhum_brinker            |
| WING-A/P pattern          | 20-saxophone             | lhum_saxophone          |
| WING-A/P pattern          | 2-engrailed              | lhum_engrailed          |
| WING-A/P pattern          | 3-escargot               | lhum_escargot           |
| WING-A/P pattern          | 4-medea                  | lhum_medea              |
| WING-A/P pattern          | 5-optomotorblind         | lhum_omb                |
| WING-A/P pattern          | 6-patched                | lhum_patched            |
| WING-A/P pattern          | 7-cubitus interruptus    | lhum_cubitusinterruptus |
| WING-A/P pattern          | 8-smad on x              | lhum_smox               |
| WING-A/P pattern          | 9a-spalt-related         | lhum_spalt-related      |

|                      |                                  |                              |
|----------------------|----------------------------------|------------------------------|
| WING-A/P pattern     | 9-spalt                          | lhum_spalt                   |
| WING-Apoptosis       | 11-p53                           | lhum_p53                     |
| WING-Apoptosis       | 12-JNK basket bsk                | lhum_JNK                     |
| WING-Apoptosis       | 13-Eiger egr                     | lhum_eiger                   |
| WING-Apoptosis       | 14-wengen wgn                    | lhum_wengen                  |
| WING-Apoptosis       | 15-Buffy                         | lhum_bcl-like                |
| WING-Apoptosis       | 16- Ras1 Ras85D                  | lhum_ras1                    |
| WING-Apoptosis       | 19- Dredd                        | lhum_dredd                   |
| WING-Apoptosis       | 1-dronc Nc                       | lhum_dronc                   |
| WING-Apoptosis       | 20- caspase-like                 | lhum_caspase-like            |
| WING-Apoptosis       | 21- caspase-likeB                | lhum_caspase-likeB           |
| WING-Apoptosis       | 22- caspase-likeC                | lhum_caspase-likeC           |
| WING-Apoptosis       | 2-drice ICE                      | lhum_drICE                   |
| WING-Apoptosis       | 3-diap-1/thread th               | lhum_diap1                   |
| WING-Apoptosis       | 8-dcp-1                          | lhum_dcp-1                   |
| WING-D/V pattern     | 10-serrate                       | Lhum_serrate                 |
| WING-D/V pattern     | 11-mindbomb                      | Lhum_mindbomb                |
| WING-D/V pattern     | 12-dsrf(blistered)               | Lhum_blistered               |
| WING-D/V pattern     | 13-notum/wingful                 | Lhum_notum                   |
| WING-D/V pattern     | 14-Hipk                          | Lhum_hipk                    |
| WING-D/V pattern     | 15-tartan/capricious             | Lhum_tartan-capricious-likeA |
| WING-D/V pattern     | 16-tartan/capricious             | Lhum_tartan-capricious-likeB |
| WING-D/V pattern     | 17-arrow                         | Lhum_arrow                   |
| WING-D/V pattern     | 18-dally                         | Lhum_dally                   |
| WING-D/V pattern     | 19-nemo                          | Lhum_nemo                    |
| WING-D/V pattern     | 1-wingless                       | Lhum_wingless                |
| WING-D/V pattern     | 20-armadillo                     | Lhum_armadillo               |
| WING-D/V pattern     | 21-suppressor of hairless(Su(H)) | Lhum_suppressorofhairless    |
| WING-D/V pattern     | 22-Nipped-A                      | Lhum_nipped-a                |
| WING-D/V pattern     | 23-mastermind                    | Lhum_mastermind              |
| WING-D/V pattern     | 2-apterous                       | Lhum_apterous                |
| WING-D/V pattern     | 3-distaless                      | Lhum_distal-less             |
| WING-D/V pattern     | 4-cut                            | Lhum_cut                     |
| WING-D/V pattern     | 5-scalloped                      | Lhum_scalloped               |
| WING-D/V pattern     | 6-vestigial                      | Lhum_vestigial               |
| WING-D/V pattern     | 7-delta                          | Lhum_delta                   |
| WING-D/V pattern     | 8-fringe                         | Lhum_fringe                  |
| WING-D/V pattern     | 9-notch                          | Lhum_notch                   |
| WING-muscle dev      | 23 -mef2                         | lhum_mef2                    |
| WING-muscle dev      | 24 -sp11                         | lhum_sp11                    |
| WING-muscle identity | 18-twist                         | lhum_twist                   |

**Figure S4.** Neighbor joining tree of DNA methyltransferases using the BLOSUM 62 matrix (made using Jalview, 22). The tree includes Dnmts from two mammal species, *Homo sapiens* and *Mus musculus*, for reference (only *Dnmt3b* shown for reference).

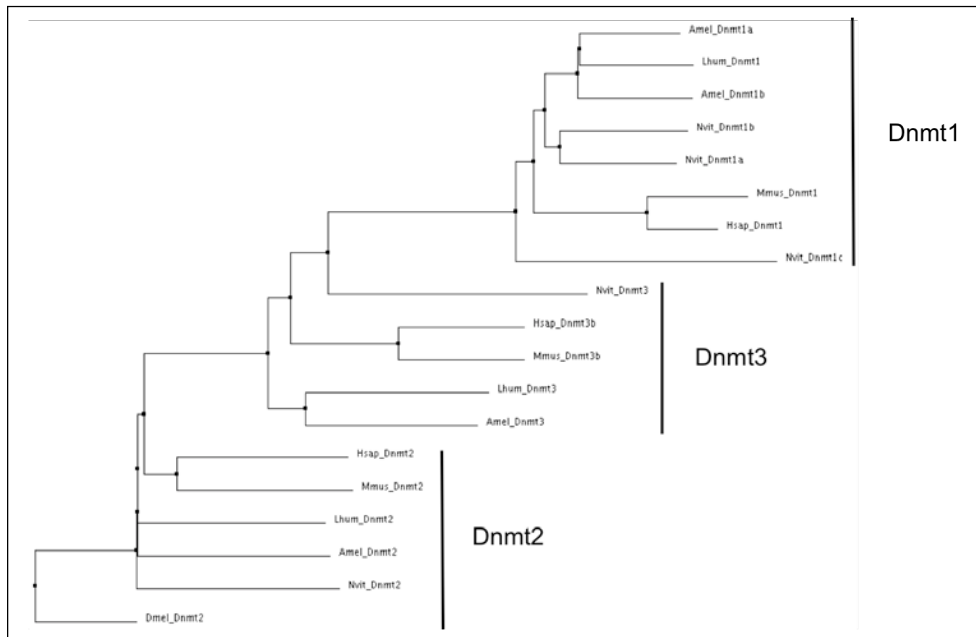

### Cytoplasmic ribosomal protein genes

Up to 10% of a cell's protein inventory is estimated to be an integral part of its ribosomes, the macromolecular complexes that catalyze protein synthesis in all organisms (24). While ribosomal RNA lies both structurally and functionally at the heart of each ribosome, a suite of peripherally arranged ribosomal proteins fulfills many critical roles pertaining to the assembly and stability of the complex. Riboproteins are, however, far more than 'RNA glue' – many serve as a binding platform for other factors in the translational process, and mediate the manifold molecular interactions of the ribosome (25). In one particular example, RACK1 (now recognized as an integral ribosomal component, 26) links several signal transduction pathways to the ribosome and can thus regulate translation in response to cell stimuli. It may also be involved in the regulation of specific mRNA translation, and the recruitment of ribosomes to sites that

require a localized boost of protein synthesis (27). In addition, various extra-ribosomal functions have been described for some ribosomal proteins, lending credibility to the hypothesis that they were co-opted from a set of pre-existing proteins during the evolution of the ribosome from a RNA-only complex to a ribonucleoprotein particle (28). In concurrence with their indispensable role, ribosomal proteins are highly conserved within eukaryotes, both in terms of number and sequence. Cytoplasmic ribosomes contain about 80 proteins (CRPs) that are encoded by a variable number of genes (mitochondrial ribosomes, being of prokaryotic origin, possess a slightly different protein makeup). However, it is widely believed that in animals, only one gene copy acts as the principal template for each riboprotein (29, 30). Conservedness and wide genomic distribution – as found in *D. melanogaster* and humans (29, 31) – make riboprotein genes ideally suited to evaluate the coverage and fidelity of both genome assemblies and automatically annotated gene sets.

Gene models coding for the cytoplasmic ribosomal proteome of *L. humile* were identified by performing a BLAST search against the OGS1.1. Ribosomal protein sequences of *D. melanogaster* from FlyBase (<http://flybase.org>) served as query sequences. These models were inspected and edited if necessary, using Apollo (21). Care was taken to ensure that the predicted gene structures matched corresponding transcriptomic data. Models were also aligned to homologous protein sequences from *D. melanogaster* and *A. mellifera* (the latter obtained from the Ribosomal Protein Gene Database, <http://ribosome.med.miyazaki-u.ac.jp>) using the default parameters in MAFFT v6 (32) to monitor the integrity of the reading frame and the extent of the predicted coding domains. Gene homology relations were inferred by querying the annotated *D.*

*melanogaster* proteins deposited at FlyBase with the translated gene models. Best reciprocal BLAST hits were interpreted as orthologs (33). Non-functional gene copies were identified by searching the *L. humile* genome assembly using the TBLASTN program and the *D. melanogaster* CRP sequences as queries, with the low complexity filter disabled and the e-value cut-off set to  $10^{-4}$ . The same strategy was employed to assess the number of CRP genes in *N. vitripennis*.

A total of 83 genes were found in the *L. humile* genome, encoding the full set of 79 cytoplasmic ribosomal proteins recognized in insect and mammalian genomes (29, 31). Four proteins are represented by two genes (RpS16, RpS23, RpS28 and RpS30); these duplicates seem to have arisen in evolutionary recent time, as is indicated by identical gene structures and an average sequence identity of 97% between the pairs.

In addition, we identified the *receptor of activated c kinase* (RACK1), which is now known to be a constituent ribosomal protein even though it is not counted among the ‘traditional’ CRPs. Two CRP-like genes (*RpL24-like* and *RpLP0-like*) that are presumably of ancient origin and present in all eukaryotic genomes (29) were also found, although their functions remain unknown. As in other animals, three genes, *RpL40*, *RpS27A* and *RpS30*, code for fusion proteins that consist of ubiquitin or ubiquitin-like sequences at the N-terminus and the respective CRPs at the C-terminal end. All of the above-mentioned genes are represented by EST data and thus transcriptionally active, although it can be hypothesized that only one copy of each duplicate pair acts as the primary gene, while the other one is generally expressed at considerably lower levels (29, 30).

Evidence for non-functional gene copies was scarce. Lack of EST support, a

truncated open reading frame and comparably low similarity to its mother gene *RpL18*, indicate the presence of a single pseudogene. In contrast to the *D. melanogaster* genome, and particularly the human genome with its thousands of processed CRPs pseudogenes (30), no pseudogenes derived from retrotransposition events were discovered.

Overall, the CRP gene repertoire of the Argentine ant shows high similarity to that of other insects. The number of genes and recent duplicates is within the same range as in *D. melanogaster* (88 genes), *A. mellifera* (80 genes) and *N. vitripennis* (79 genes), and the average sequence identity compared to the *D. melanogaster* orthologs is 77% (range: 52–100%). The high sequence similarity to the reference genes made it possible to reliably identify sequencing errors that resulted in reading frame shifts or premature stop codons. Relative to the total number of nucleotide positions coding for CRP genes (including RACK1), the five cases of presumable sequencing error that were discovered indicate one erroneous position in every 8300 nucleotides. The fidelity of the assembly sequence thus amounts to an excellent 99.988 % in coding regions of the genome, comparable to the accuracy achievable with Sanger technology. The completeness of the gene set also suggests that the *L. humile* genome assembly thoroughly covers the gene space of the genome. Further evidence for the quality of the assembly is given by the fact that no instances of scaffold misassembly could be identified during the annotation of the CRP genes.

### **Oxidative phosphorylation**

The oxidative phosphorylation (OXPHOS) pathway produces ATP, the major source of cellular energy, by utilizing a proton gradient across the inner mitochondrial membrane.

This pathway is unique in its composition; incorporating 67 nuclear-encoded genes as

well as all 13 mitochondrial protein-coding genes (34). These mitochondrial genes tend to accumulate substitutions more quickly than nuclear genes, potentially leading to incompatibility with the nuclear genes with which they normally interact. This may lead to selective pressure on the nuclear genes to compensate for the mitochondrial change (35). This potentially very rapid evolution within a highly functionally constrained pathway may implicate this pathway in hybrid incompatibility between recently diverged populations.

We found evidence for 79 nuclear encoded OXPHOS genes in the genome sequence of *L. humile*, compared to the 81 reported in *D. melanogaster* (36). Of the *D. melanogaster* genes, 14 are duplicated from the other 67 “core” nuclear encoded OXPHOS genes). One of these core genes (*cox7a*) is missing from the *L. humile* genome assembly. This gene is also not found in *A. mellifera* but is found in other holometabolous insects, including *N. vitripennis*, which may indicate that this is a deletion specific to aculeate hymenopterans. One of the 79 *L. humile* genes may be a processed pseudogene, since it is the result of a duplication and contains the full transcript in a single exon. There appear to be eight *L. humile*-specific duplications (not including the aforementioned pseudogene) that are not found in other taxa. All of the conserved copies of these duplications (that is, the copy that is most similar to the *D. melanogaster* reference gene) have EST support, consistent with the relatively high expression level of the nuclear encoded OXPHOS genes. However, all but one of the divergent copies had no EST support, indicating that these genes may have been co-opted for a different purpose.

### **Single nucleotide polymorphisms (SNPs)**

Since the genomic reads used for the *L. humile* assembly were derived from multiple diploid females (1 queen pupa and ~100 workers) (Table S1), it was possible to identify single nucleotide polymorphisms (SNPs) from the natural genetic diversity captured in the raw reads. Such SNP-rich regions might indicate genes or regulatory regions under selection and since our genomic sequences were from the introduced range, these SNPs could be excluded from other polymorphisms that differ in the native range.

We used the Roche gsMapper tool and custom Perl scripts to identify SNPs in the V0.4 Celera assembly of the *L. humile* genome. Briefly, individual unpaired 454 and Illumina reads were mapped back to the reference assembly using the Roche gsMapper tool. We intentionally only evaluated cases in which a single nucleotide in one read had another single base transition or transversion mutation and omitted cases of insertions and deletions. Custom Perl scripts were used to extract SNPs that were present in 10% or more of the reads and to identify C->T and T->C SNPs followed by a G. All SNP data were converted to GFF3, then loaded into the Chado database to determine intersections with InterProScan and other results. Overall, we discovered a total of 381,232 SNPs with two supporting reads and 231,248 with three or more overlapping reads where the SNP is present in at least 10% of the read data. Overall, single base transition mutations accounted for 78.84% of SNPs, while transversions accounted for 21.15%. In the main text we report results for all single base SNPs occurring in at least three reads and in more than 10% of mapped reads. The top 100 ranked genes with SNPs can be found in Table S3.



**Table S3. Top 100 genes containing the most SNPs.** The total number of SNPs present in at least three reads and 10% of mapped reads were tabulated over the exons for OGS1.1 and manually annotated genes. The genes with the highest number of SNPs per kilobase (kb) are listed in ranked order along with the predicted function based on InterProScan and GO analyses. Genes that also rank in the top 100 genes with a CG<->TG SNP are listed with an asterisk.

| <i>L. humile</i> Gene ID | # SNPs | Sum Exon Length (bp) | # SNP/kb | Interproscan/GO Function                                         |
|--------------------------|--------|----------------------|----------|------------------------------------------------------------------|
| LH10736                  | 66     | 763                  | 87       | Unknown                                                          |
| LH15115                  | 48     | 610                  | 79       | Unknown                                                          |
| LH10737*                 | 140    | 1992                 | 70       | Unknown                                                          |
| LH14822                  | 23     | 337                  | 68       | Unknown                                                          |
| LH10484                  | 39     | 574                  | 68       | Unknown                                                          |
| LH10768                  | 19     | 281                  | 68       | Male sterility, NAD-binding                                      |
| LH10490                  | 17     | 253                  | 67       | ATP synthesis coupled proton transport                           |
| LH11476*                 | 30     | 447                  | 67       | Unknown                                                          |
| LH15774                  | 54     | 807                  | 67       | Zinc finger, C2CH-type                                           |
| LH10566                  | 28     | 421                  | 67       | Unknown                                                          |
| LH10738                  | 107    | 1702                 | 63       | Unknown                                                          |
| LH24234                  | 26     | 425                  | 61       | MoeA, N-terminal, domain I and II                                |
| LH19459*                 | 114    | 1922                 | 59       | Glucose-methanol-choline oxidoreductase                          |
| LH13364                  | 47     | 800                  | 59       | Unknown                                                          |
| LH23737                  | 17     | 293                  | 58       | Unknown                                                          |
| LH11566                  | 17     | 301                  | 56       | Male sterility, NAD-binding                                      |
| LH10423                  | 34     | 602                  | 56       | Maternal tudor protein                                           |
| LH10777                  | 20     | 355                  | 56       | Unknown                                                          |
| LH13452                  | 21     | 397                  | 53       | Cellular retinaldehyde-binding/triple function                   |
| LH10522                  | 18     | 347                  | 52       | Cytochrome b/b6                                                  |
| LH19086                  | 18     | 356                  | 51       | Cytochrome P450                                                  |
| LH10523                  | 12     | 238                  | 50       | Respiratory-chain NADH dehydrogenase                             |
| LH10151                  | 21     | 421                  | 50       | Unknown                                                          |
| LH14397                  | 29     | 587                  | 49       | Retrotransposon                                                  |
| LH10668                  | 13     | 267                  | 49       | Alanyl tRNA synthetase                                           |
| LH14471                  | 30     | 641                  | 47       | Male sterility, NAD-binding<br>S-adenosyl-L-methionine-dependent |
| LH11410                  | 17     | 369                  | 46       | methyltransferases                                               |
| LH10428                  | 35     | 763                  | 46       | Unknown                                                          |
| LH18354                  | 34     | 752                  | 45       | Protein tyrosine phosphatase activity                            |
| LH10554                  | 83     | 1861                 | 45       | Zinc finger, CCHC-type                                           |
| LH23198                  | 26     | 589                  | 44       | Unknown                                                          |
| LH10564                  | 15     | 340                  | 44       | Unknown                                                          |
| LH14669                  | 13     | 296                  | 44       | Unknown                                                          |
| LH15116*                 | 60     | 1397                 | 43       | Unknown                                                          |
| LH10361                  | 11     | 258                  | 43       | Cytochrome P450                                                  |
| LH20971                  | 11     | 269                  | 41       | Unknown                                                          |
| LH10002                  | 21     | 517                  | 41       | Unknown                                                          |
| LH15114                  | 63     | 1552                 | 41       | Male sterility, NAD-binding                                      |

|         |    |      |    |                                                                                  |
|---------|----|------|----|----------------------------------------------------------------------------------|
| LH12438 | 28 | 690  | 41 | Retroviral Protease-related                                                      |
| LH14791 | 23 | 580  | 40 | Unknown                                                                          |
| LH23196 | 17 | 436  | 39 | Unknown                                                                          |
| LH13453 | 11 | 286  | 38 | Cellular retinaldehyde-binding/triple function                                   |
| LH10295 | 17 | 442  | 38 | Cytochrome P450                                                                  |
| LH20452 | 11 | 289  | 38 | Male sterility, NAD-binding                                                      |
| LH12750 | 23 | 614  | 37 | Unknown                                                                          |
| LH22547 | 65 | 1814 | 36 | Beta-ketoacyl synthase                                                           |
| LH14710 | 28 | 789  | 35 | Unknown                                                                          |
| LH10691 | 9  | 255  | 35 | Unknown                                                                          |
| LH10371 | 17 | 484  | 35 | Zinc finger, CCHC-type                                                           |
| LH10368 | 8  | 229  | 35 | EGF-like                                                                         |
| LH12706 | 36 | 1043 | 35 | Unknown                                                                          |
| LH10485 | 16 | 466  | 34 | Unknown                                                                          |
| LH10031 | 30 | 877  | 34 | Unknown                                                                          |
| LH10275 | 21 | 615  | 34 | Unknown                                                                          |
| LH10294 | 14 | 410  | 34 | Cytochrome P450                                                                  |
| LH10175 | 18 | 528  | 34 | Unknown                                                                          |
| LH15775 | 11 | 324  | 34 | Unknown                                                                          |
| LH10223 | 26 | 767  | 34 | Beta-ketoacyl synthase                                                           |
| LH10240 | 13 | 386  | 34 | Unknown                                                                          |
| LH10172 | 8  | 239  | 33 | Cytochrome P450                                                                  |
| LH24208 | 58 | 1744 | 33 | M,I,L,Y,V Aminoacyl-tRNA synthetase, class I                                     |
| LH10528 | 7  | 212  | 33 | Unknown                                                                          |
| LH23634 | 16 | 499  | 32 | Unknown                                                                          |
| LH20022 | 9  | 284  | 32 | Unknown                                                                          |
| LH19133 | 20 | 639  | 31 | Unknown                                                                          |
| LH10562 | 11 | 352  | 31 | Unknown                                                                          |
| LH13944 | 28 | 904  | 31 | Unknown                                                                          |
| LH10118 | 8  | 260  | 31 | Beta-ketoacyl synthase                                                           |
| LH11789 | 38 | 1237 | 31 | Male sterility, NAD-binding                                                      |
| LH11587 | 37 | 1207 | 31 | Unknown                                                                          |
| LH23651 | 26 | 850  | 31 | Zinc finger, C2CH-type                                                           |
| LH10713 | 4  | 131  | 31 | Unknown                                                                          |
| LH10769 | 23 | 766  | 30 | Cellular retinaldehyde-binding/triple function                                   |
| LH10557 | 9  | 300  | 30 | Unknown                                                                          |
| LH23236 | 13 | 434  | 30 | Unknown                                                                          |
| LH10539 | 6  | 202  | 30 | Unknown                                                                          |
| LH10845 | 17 | 586  | 29 | Cellular retinaldehyde-binding/triple function                                   |
| LH10221 | 34 | 1174 | 29 | Unknown                                                                          |
| LH23116 | 37 | 1279 | 29 | Unknown                                                                          |
| LH14821 | 10 | 346  | 29 | Unknown                                                                          |
| LH10861 | 21 | 730  | 29 | Unknown                                                                          |
| LH19443 | 33 | 1150 | 29 | Nose resistant to fluoxetine-4                                                   |
| LH15067 | 28 | 978  | 29 | Unknown                                                                          |
| LH18214 | 18 | 629  | 29 | Copper ion homeostasis                                                           |
| LH18957 | 38 | 1340 | 28 | Unknown                                                                          |
| LH10061 | 12 | 425  | 28 | Collagen alpha<br>FAD-dependent pyridine nucleotide-disulphide<br>oxidoreductase |
| LH15199 | 16 | 567  | 28 |                                                                                  |

|         |    |      |    |                                         |
|---------|----|------|----|-----------------------------------------|
| LH15106 | 21 | 745  | 28 | Unknown                                 |
| LH10510 | 8  | 284  | 28 | Cytochrome P450                         |
| LH14782 | 22 | 786  | 28 | Unknown                                 |
| LH10194 | 10 | 358  | 28 | Unknown                                 |
| LH10072 | 41 | 1486 | 28 | EGF-like                                |
| LH11848 | 21 | 769  | 27 | Unknown                                 |
| LH13469 | 6  | 221  | 27 | Histone Acetyl Transferase Dimerization |
| LH13456 | 13 | 487  | 27 | Unknown                                 |
| LH11735 | 30 | 1133 | 26 | General transcription factor 2-related  |
| LH15598 | 14 | 529  | 26 | Zinc finger, CCHC-type                  |
| LH22726 | 9  | 345  | 26 | Unknown                                 |
| LH10292 | 23 | 884  | 26 | Unknown                                 |

  

| <i>L. humile</i> Gene ID | # SNPs | Sum Exon Length (bp) | # SNP/kb | Interproscan/GO Function |
|--------------------------|--------|----------------------|----------|--------------------------|
|--------------------------|--------|----------------------|----------|--------------------------|

**Table S8. Top 100 genes containing the most CG <-> TG SNPs.** The total number of CG->TG and TG->CG SNPs present in at least 10% of mapped reads were tabulated over the introns and exons for OGS1.1 and manually annotated genes. The genes with the highest number of SNPs are listed in ranked order along with the predicted function based on InterProScan and GO analyses. Genes that also rank in the top 100 genes with any SNP are listed with an asterisk.

| <i>L. humile</i> Gene ID | # CG <-> TG SNPs | Interproscan/GO Function                                            |
|--------------------------|------------------|---------------------------------------------------------------------|
| LH22547*                 | 26               | Beta-ketoacyl synthase                                              |
| LH10223*                 | 13               | ABC transporter                                                     |
| LH19567                  | 12               | ABC transporter                                                     |
| LH15114*                 | 12               | Male sterility, NAD-binding                                         |
| LH13099                  | 12               | Unknown                                                             |
| LH21678                  | 11               | Major facilitator superfamily general substrate transporter         |
| LH19774                  | 11               | Zinc finger, C6HC-type                                              |
| LH12438*                 | 11               | Retroviral Protease-related                                         |
| LH10072*                 | 11               | EGF-like                                                            |
| LH14263                  | 11               | Immunoglobulin-like fold                                            |
| LH10281*                 | 11               | Male sterility, NAD-binding                                         |
| LH10324                  | 10               | Helicase-related                                                    |
| LH11824                  | 10               | Beta-ketoacyl synthase                                              |
| LH10984                  | 10               | Syntaxin/epimorphin, conserved site                                 |
| LH23430                  | 10               | Maternal tudor protein                                              |
| LH12427                  | 10               | Unknown                                                             |
| LH17005                  | 10               | Unknown                                                             |
| LH15975                  | 10               | Protein kinase C, phorbol ester/diacylglycerol binding              |
| LH10554*                 | 9                | Zinc finger, CCHC-type                                              |
| LH23822                  | 8                | Acetylcholine Receptor Protein Alpha 1, 2, 3, 4                     |
| LH10737                  | 8                | Unknown                                                             |
| LH19108*                 | 8                | Carboxylesterase, type B                                            |
| LH16800                  | 8                | Unknown                                                             |
| LH24790                  | 8                | Guanine nucleotide exchange factor for Ras-like GTPases, N-terminal |

|          |   |                                                                                           |
|----------|---|-------------------------------------------------------------------------------------------|
| LH19987  | 8 | Unknown                                                                                   |
| LH25151  | 8 | Serine/threonine protein kinase                                                           |
| LH11485  | 8 | Tetratricopeptide region                                                                  |
| LH14375  | 8 | TonB box                                                                                  |
| LH12706* | 8 | Unknown                                                                                   |
| LH14824  | 8 | Rab GTPase activator activity                                                             |
| LH21310  | 8 | Peptidase M2, peptidyl-dipeptidase A                                                      |
| LH19459  | 8 | Glucose-methanol-choline oxidoreductase                                                   |
| LH21309  | 8 | EGF-like                                                                                  |
| LH14856  | 7 | Glycoside hydrolase, family 47                                                            |
| LH15643  | 7 | EGF-like                                                                                  |
| LH15694  | 7 | Cytochrome P450                                                                           |
| LH16977  | 7 | Low density lipoprotein-receptor, class A / serine-type endopeptidase                     |
| LH16271  | 7 | Peptidase S8 and S53, subtilisin, kexin, sedolisin                                        |
| LH10850  | 7 | Cytochrome P450                                                                           |
| LH24147  | 7 | Guanine nucleotide exchange factor for Ras-like GTPases                                   |
| LH11563  | 7 | Restriction endonuclease, type II-like                                                    |
| LH15429  | 7 | Helix-turn-helix, Psq                                                                     |
| LH22089  | 7 | Pyridoxal phosphate-dependent decarboxylase                                               |
| LH17329  | 7 | Unknown                                                                                   |
| LH18215  | 7 | Zinc finger, LIM-type                                                                     |
| LH16950  | 7 | Cholesterol transporter                                                                   |
| LH14700* | 7 | Unknown                                                                                   |
| LH17535  | 6 | Plectin/Plakin repeat                                                                     |
| LH23698  | 6 | Tyrosyl-DNA phosphodiesterase                                                             |
| LH11284  | 6 | Peptidase S54, rhomboid                                                                   |
| LH19447  | 6 | Formate C-acetyltransferase                                                               |
| LH10442* | 6 | Ribonuclease H-like                                                                       |
| LH15166  | 6 | Zinc finger, SWIM-type                                                                    |
| LH22562  | 6 | Multidrug resistance ABC transporter MsbA                                                 |
| LH17034  | 6 | Fibronectin, type III-like                                                                |
| LH12749* | 6 | Unknown                                                                                   |
| LH14073  | 6 | Fibronectin, type III-like                                                                |
| LH16922  | 6 | Armadillo-like helical                                                                    |
| LH12090  | 6 | Calcium-binding EF-hand                                                                   |
| LH17201  | 6 | Dynein heavy chain                                                                        |
| LH14988  | 6 | Transmembrane 4 Superfamil, Invertebrate                                                  |
| LH20348  | 6 | Pyridoxal phosphate-dependent transferase                                                 |
| LH22813  | 6 | Family A G protein-coupled receptor-like                                                  |
| LH13835  | 6 | Peptidase M14, carboxypeptidase A                                                         |
| LH15363  | 6 | Zinc finger, C2H2-type                                                                    |
| LH16103  | 6 | Vestigial/tondu                                                                           |
| LH18363  | 6 | Acyltransferase ChoActase/COT/CPT                                                         |
| LH19470  | 6 | Unconventional myosin/plant kinesin-like protein/non-motor protein conserved region MyTH4 |
| LH20070  | 6 | Eukaryotic translation initiation factor 3 subunit 8                                      |
| LH22201  | 6 | Adenylosuccinate synthetase                                                               |
| LH19132  | 6 | Beta-ketoacyl synthase                                                                    |
| LH11476  | 6 | Unknown                                                                                   |
| LH23873  | 6 | Exonuclease, RNase T and DNA polymerase III                                               |

|         |   |                                                    |
|---------|---|----------------------------------------------------|
| LH23224 | 6 | Pleckstrin homology-type                           |
| LH22559 | 6 | Toll-Interleukin receptor                          |
| LH21367 | 6 | HLH, helix-loop-helix DNA-binding domain           |
| LH15624 | 6 | Unknown                                            |
| LH17494 | 6 | Zinc finger, SWIM-type                             |
| LH13503 | 6 | Eukaryotic type KH-RNA binding domain              |
| LH15116 | 6 | Unknown                                            |
| LH22554 | 6 | Fatty Acid Desaturase                              |
| LH12365 | 6 | Unknown                                            |
| LH20017 | 5 | Nose resistant to fluoxetine-4                     |
| LH24965 | 5 | Peptidase S8 and S53, subtilisin, kexin, sedolisin |
| LH22590 | 5 | Unknown                                            |
| LH10979 | 5 | Spermadhesin, CUB domain                           |
| LH20799 | 5 | Troponin                                           |
| LH12319 | 5 | Huntington Associated Protein                      |
| LH13791 | 5 | WD40/YVTN repeat-like                              |
| LH22256 | 5 | Peptidase M1, membrane alanine aminopeptidase      |
| LH13741 | 5 | Serine/threonine protein kinase                    |
| LH14883 | 5 | Sterile alpha motif homology                       |
| LH18967 | 5 | Formin binding protein-related, Arthropod          |
| LH17974 | 5 | Unknown                                            |
| LH16209 | 5 | Unknown                                            |
| LH13522 | 5 | Lissencephaly-1 protein                            |
| LH16463 | 5 | Spermadhesin, CUB domain                           |
| LH24778 | 5 | SCY1-related Serine/Threonine Kinase-like          |
| LH22593 | 5 | Armadillo-like                                     |
| LH20546 | 5 | Protein serine/threonine phosphatase 2C            |

### Repetitive DNA

We analyzed the repeat content of the *L. humile* genome using RepeatMasker (37) and the RepeatRunner (19) subroutine that is integrated into the MAKER annotation pipeline (Table 2)(8). One difficulty in the analysis of metazoan genomes is that repeat libraries from even closely related species often fail to identify potential repetitive regions, making it necessary to create *de novo* repeat libraries. In addition to 30 known microsatellites for *L. humile*, we generated *de novo* repeat libraries using RepeatModeler (v1.03) and PILER-DF. RepeatModeler integrates RECON (38), TRF (39), and RepeatScout (40) data and classifies repeats with the RepBase Repeatmasker library. We also used PILER-DF (9) to identify regions from whole genome self-alignments that were present three or more times. We then screened for false positives using BLASTX against

known *D. melanogaster* genes (Release 5.25).

Initial runs of PILER-DF and RepeatModeler against the *L. humile* genome assembly returned 554 total raw repeat predictions of which RECON, RepeatScout, and PILER-DF generated 362, 135, and 57, respectively (Table 2). We then removed 16 redundant sequences that were greater than 80% identical over 80% of their length and identified 15 sequences to be false positives via a BLASTX analysis against known genes. Alignments displaying sequence identities greater than a threshold value while scoring higher than 30 bits were manually checked for homology to repetitive gene clusters such as histones and *Stellate* elements, well-conserved functional sites, or genes with repetitive exon structures such as *mucin* or *dumpy*. The sequence identity threshold was iteratively relaxed until diminishing returns converged to zero at 50% sequence identity. At each iteration, sequences identified as false positives were culled from the repeat library. In addition, we found additional LTRs and DNA transposons using a custom script to identify long terminal repeats (LTR) and terminal inverted repeats (TIR) at the terminal ends of unclassified repeat predictions.

Published data for the honeybee (*A. mellifera*, 41) and jewel wasp (*N. vitripennis*, 42) genomes illustrate two extremes of genomic repeat composition for Hymenoptera: the honeybee is AT-rich (67%) but devoid of all except a few mariner (43) and rDNA-specific R2 (44) transposable elements, while *Nasonia* has an AT content (58%) similar to other *D. melanogaster* (56%) and numerous retroid elements. The *L. humile* genome assembly has a 62% AT composition, intermediate to *Nasonia* and *Apis*, but also contains 23.6Mb (11%) of interspersed TEs. A total of 7,828 retroid and 8,720 DNA transposon fragments were identified, however, the majority of interspersed elements (67,928,

17.1Mb, 6.8% of genome) were identified with *de novo* predications and could not be classified to a specific TE family. We discovered most known families of transposable elements with the exception of L1 and CRE/SLAC LINE-like elements. Gypsy/DIR1 and R1/LOA/Jockey elements were the most abundant retroid elements and Tc1 repeats were the most abundant DNA TEs.

### **Viruses and viroids**

Viruses specifically infecting hymenopterans have been reported for the red imported fire (*Solenopsis invicta*, 45, 46) and *A. mellifera* (47), and may play a significant role in colony survival and fitness. We screened the *L. humile* genome for the presence of 1778 sequenced virus and viroid genomes and report TBLASTX hits that had bit scores greater than 100 or had more than 50% of the virus aligned in the genome with 50% or greater sequence identity. This analysis yielded ~300 significantly aligning regions spanning over 400 kilobases (Table S4). Previous studies in *N. vitripennis* identified poxvirus-associated PRANC domains in the genome that appeared to be laterally transferred from *Wolbachia* endosymbionts. We downloaded *Nasonia*-defined PRANC domains from [www.treebase.org](http://www.treebase.org) (Study #S10521) and used them to train a custom hidden Markov model using HHMER 3.0 (48). We then scanned the *L. humile* genome using this HMM, but could not identify statistically significant PRANC domains.

**Table S4. Viral and viroid DNA.** Viruses and viroids found in the *L. humile* genome, ranked by total number of bases aligned by TBLASTX. Viruses & viroids restricted to insect (orange), plant or algae (green), microbes (purple), vertebrates (grey), or unknown (white) are indicated. \*, Iridoviridae also infect fish, amphibians, and reptiles.

| <b>Virus Family</b>        | <b>Bases Aligned</b> |
|----------------------------|----------------------|
| Baculoviridae              | 144,777              |
| Polydnaviridae             | 112,214              |
| Caulimoviridae             | 59,001               |
| Poxviridae                 | 45,497               |
| Phycodnaviridae            | 26,643               |
| Unclassified dsDNA viruses | 8,762                |
| Mimiviridae                | 8,564                |
| Herpesvirales              | 7,395                |
| Iridoviridae*              | 6,526                |
| Ascoviridae                | 5,031                |
| Caudovirales               | 3,981                |
| Apscaviroid                | 1,923                |
| Pospiviroid                | 1,629                |
| Nimaviridae                | 1,542                |
| Cocaviroid                 | 1,503                |
| Coleviroid                 | 924                  |
| Hostuviroid                | 486                  |
| Avsunviroid                | 459                  |
| Unclassified phage         | 282                  |
| Asfarviridae               | 222                  |
| Unclassified viroids       | 186                  |
| <b>TOTAL</b>               | <b>437,781 bp</b>    |

### **KEGG, InterProScan, and Gene Ontology Analysis**

We used InterProScan (49) and KEGG (50) (Fig. S2, Table S5) to identify putative functional domains and looked for enriched Gene Ontology (GO) gene functions both in the species-specific genes identified from the *L. humile* OGS1.1 and for all Argentine ant genes relative to *D. melanogaster*, *A. mellifera*, and *N. vitripennis* (Tables S6 and S7). We analyzed the complete set of *L. humile* MAKER predictions (15,345) and *ab initio* gene predictions (29,206) with InterProScan and KEGG to identify gene regions with similarity to known functional domains. Raw InterProScan results were parsed using custom Perl scripts to generate a Gene Ontology GAF2.0 file that was used as an input to identify enriched Gene Ontology terms using Go-Term-Finder v0.86 (51)



(<http://search.cpan.org/dist/GO-TermFinder/>). For comparative purposes we performed a similar GO enrichment analysis on the *D. melanogaster* GO annotations (geneontology.org, 52). Since we were unaware of an existing GO annotation for the *A. mellifera* and *N. vitripennis* genomes, we generated one using InterProScan analysis of the ‘preOGS2 honeybee peptides’ and OGS1.2 *Nasonia* peptides ([www.beebase.org](http://www.beebase.org)). Enrichments were tested for statistical significance using a Fisher exact test with Bonferroni correction and a 0.05 false discovery rate.

In total, 23,575 GO terms were reported for *L. humile*. This is a similar proportion of the genes as in other Hymenoptera, but distinct from *D. melanogaster* (Tables S6 and S7). This difference may, however, be partially due to ascertainment bias, as all three Hymenoptera had automated annotations, whereas *D. melanogaster* genomes are human-curated with biological verification.

**Figure S2.** Overview of annotated KEGG pathways. Brightly shaded lines indicate pathways with *L. humile* genes that have been annotated in OGS1.1. Specific KEGG maps can be downloaded from [http://HymenopteraGenome.org/linepithema/genome\\_consortium/datasets.html](http://HymenopteraGenome.org/linepithema/genome_consortium/datasets.html)

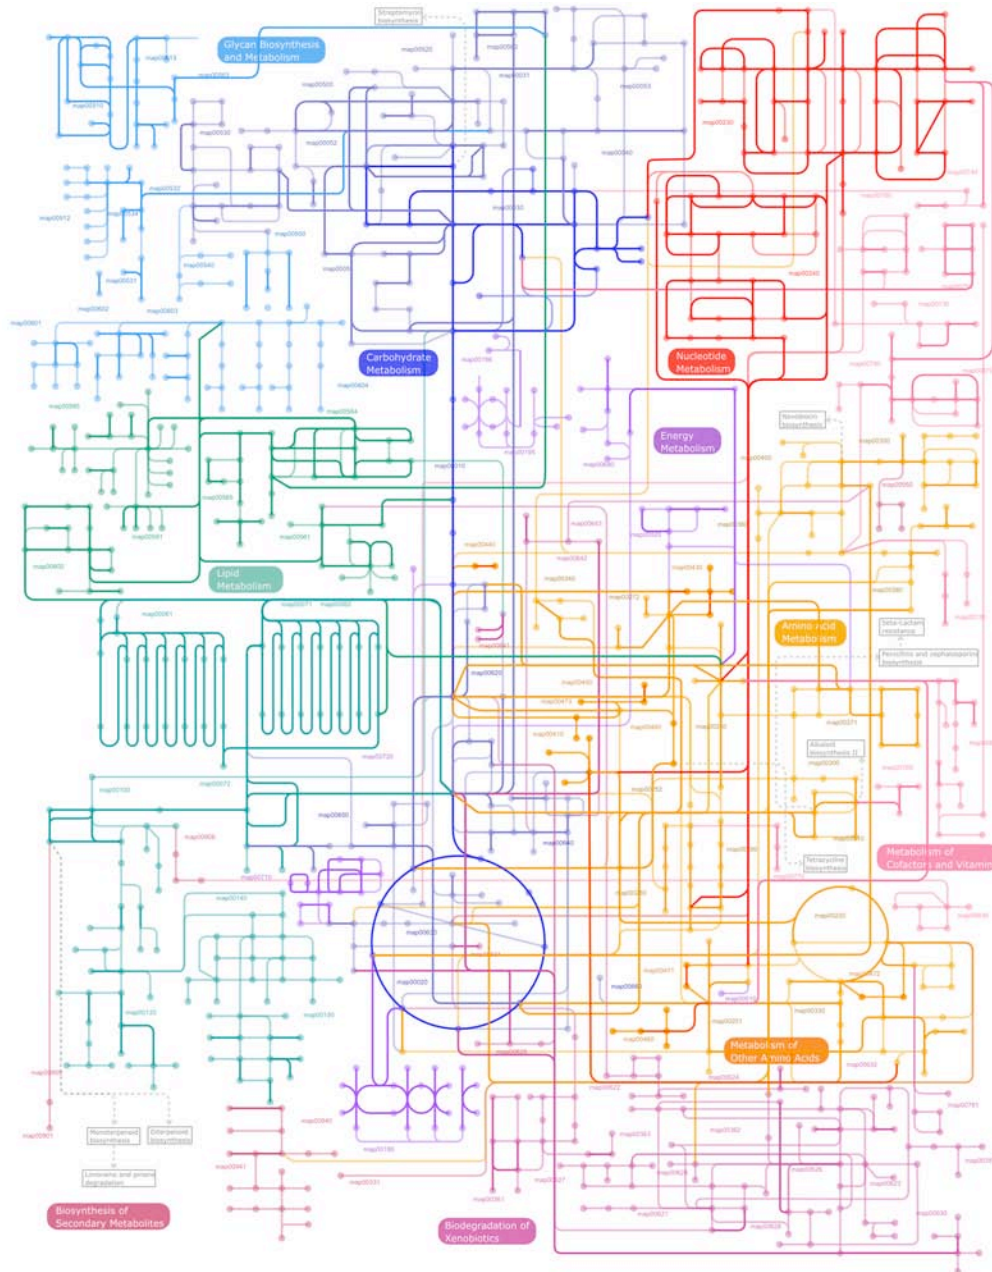

**Figure S3.** GO enrichment figures. GO terms for *L. humile*-specific genes were compared to the genome-wide statistics and evaluated for enrichment using Go-Term-Finder. The number of genes annotated with each GO terms are shown along with the percentage incidence for *L. humile*-specific genes (blue) and all *L. humile* genes (red). P-value for enrichments are indicated to the right. Yellow highlighting indicates example GO terms that describe genes seen to have expansions in *L. humile* from other data in this study. GO cellular location terms are highlighted in green.

A)

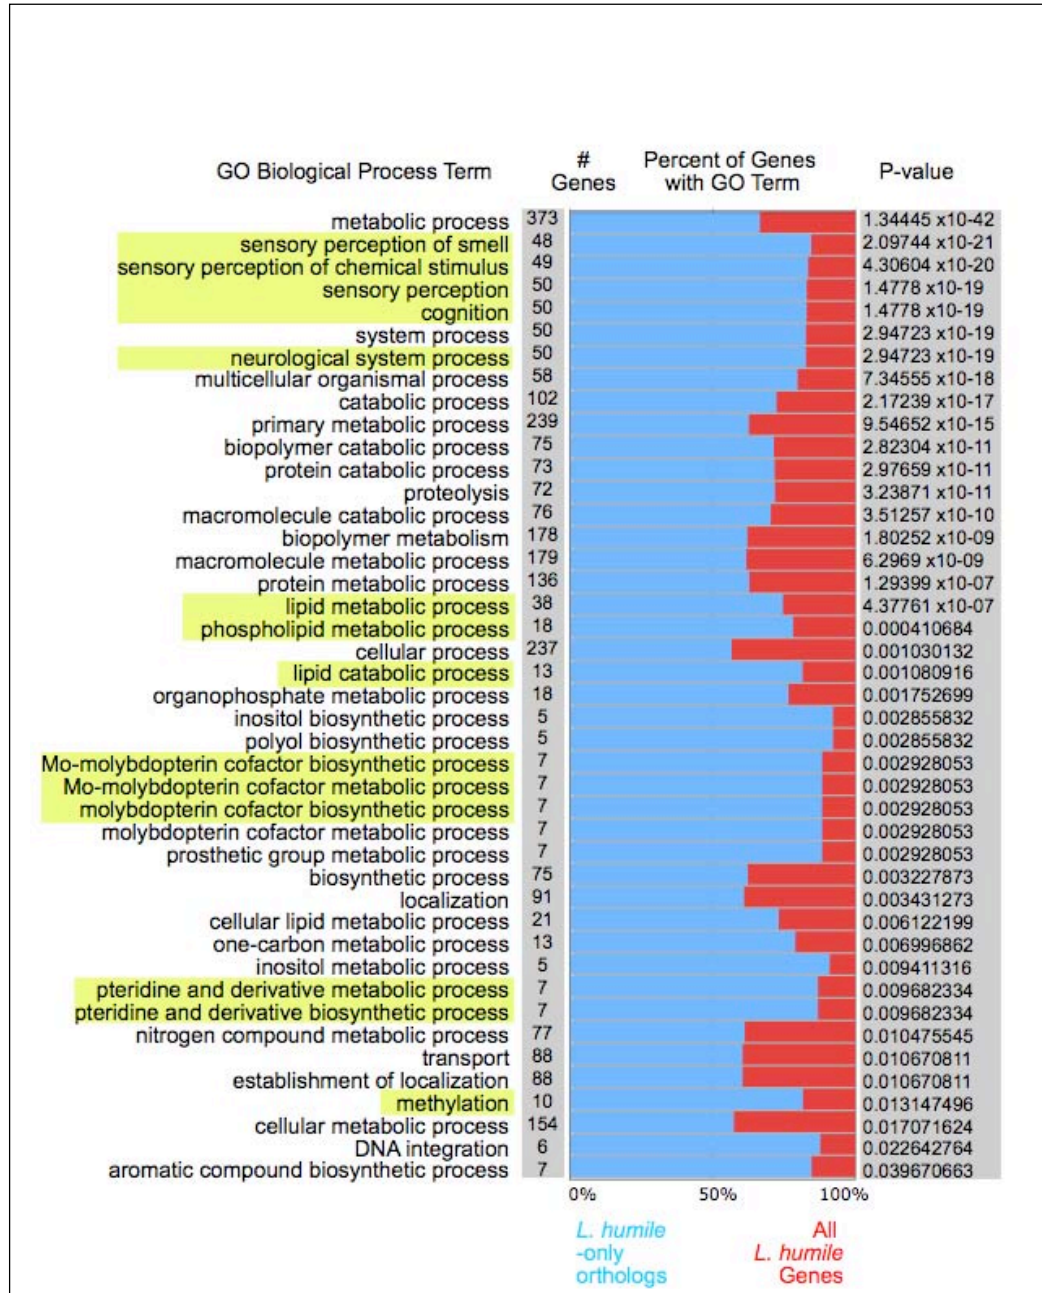

B)

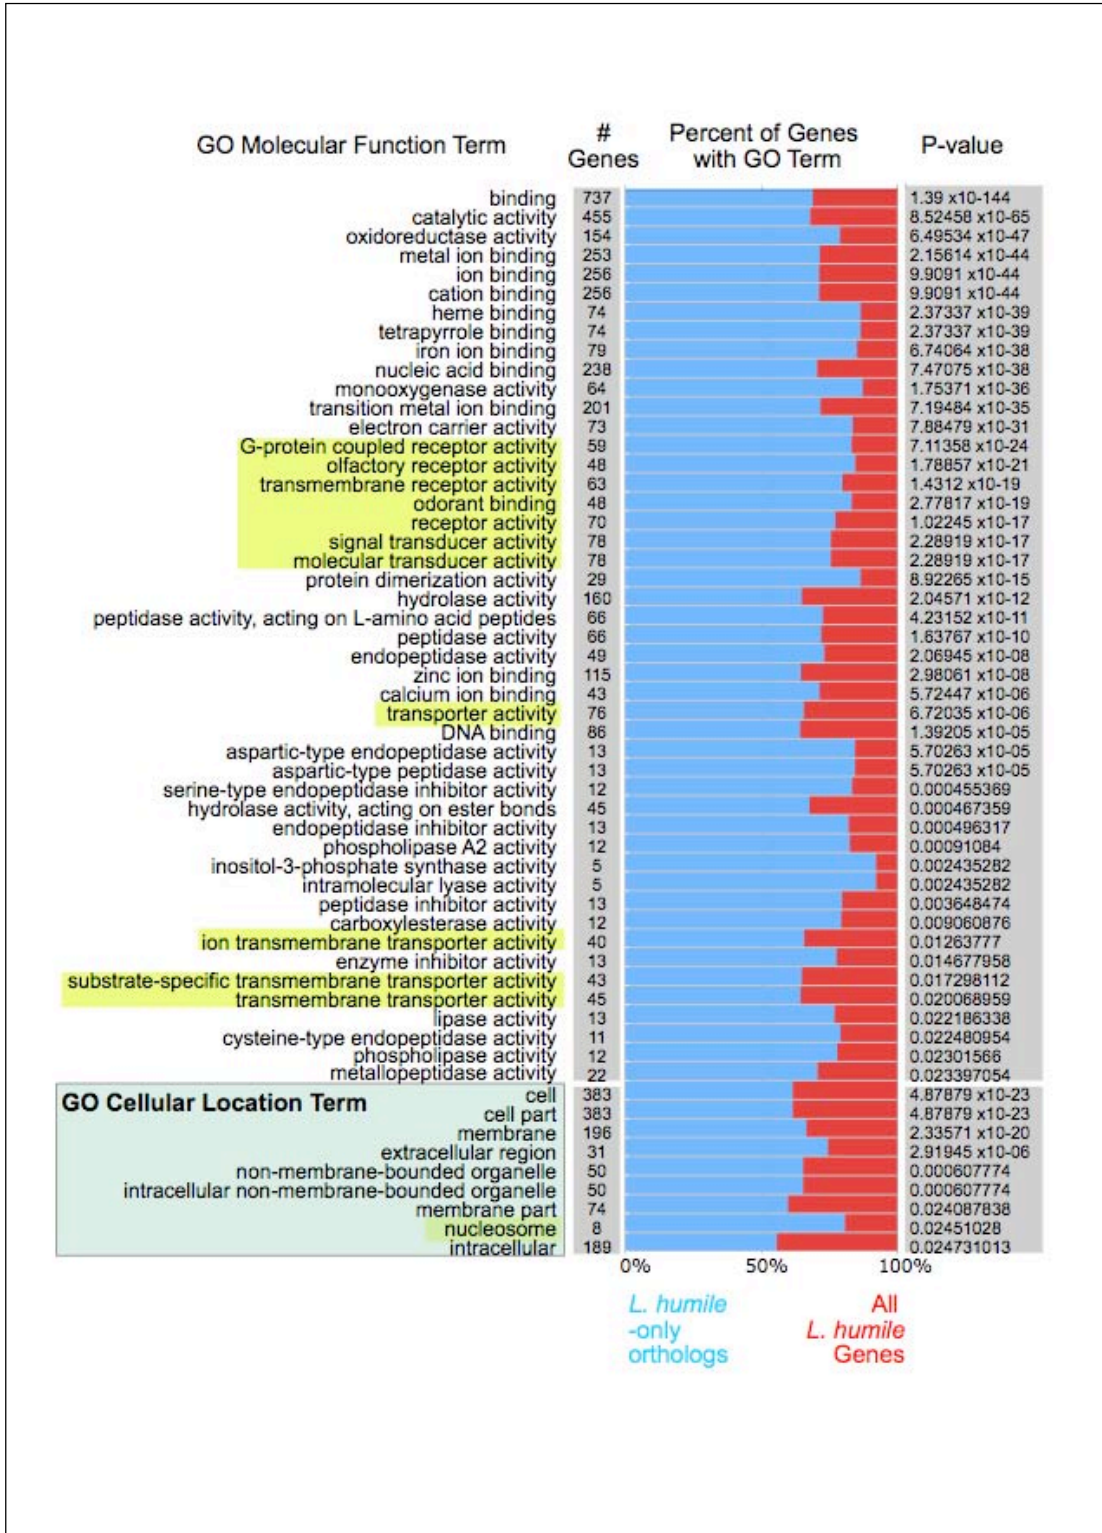

**Table S6.** Summary of GO Slim Terms for *L. humile*, *N. vitripennis*, *A. mellifera*, and *D. melanogaster*. GO terms were ‘slimmed’ using the Amigo online tool. Percent of genes mapped to each GO term is shown for each species. Blue cells indicate terms that are represented fewer times than *D. melanogaster*, while yellow stippled cells are found a higher percent of the time than in fruitfly. Frequencies comparable to *Drosophila* are shaded grey.

|                                                | <i>L.</i><br><i>humile</i> | <i>N.</i><br><i>vitripennis</i> | <i>A.</i><br><i>mellifera</i> | <i>D. melanogaster</i> |
|------------------------------------------------|----------------------------|---------------------------------|-------------------------------|------------------------|
| <b>BIOLOGICAL PROCESS</b>                      |                            |                                 |                               |                        |
| biological_process                             | 11.62                      | 11.52                           | 11.52                         | 16.36                  |
| transport                                      | 1.52                       | 1.61                            | 1.5                           | 1.57                   |
| cell communication                             | 0.7                        | 0.69                            | 0.71                          | 1.3                    |
| signal transduction                            | 0.61                       | 0.58                            | 0.6                           | 0.93                   |
| ion transport                                  | 0.39                       | 0.49                            | 0.4                           | 0.21                   |
| response to stress                             | 0.36                       | 0.35                            | 0.35                          | 0.64                   |
| transcription                                  | 0.34                       | 0.35                            | 0.33                          | 0.33                   |
| generation of precursor metabolites and energy | 0.32                       | 0.37                            | 0.29                          | 0.11                   |
| protein transport                              | 0.25                       | 0.32                            | 0.22                          | 0.24                   |
| cell cycle                                     | 0.18                       | 0.14                            | 0.18                          | 0.89                   |
| cell death                                     | 0.11                       | 0.12                            | 0.11                          | 0.3                    |
| death                                          | 0.11                       | 0.12                            | 0.11                          | 0.32                   |
| response to external stimulus                  | 0.09                       | 0.06                            | 0.09                          | 0.38                   |
| growth                                         | 0.07                       | 0.06                            | 0.07                          | 0.22                   |
| regulation of gene expression, epigenetic      | 0.07                       | 0.06                            | 0.07                          | 0.16                   |
| reproduction                                   | 0.05                       | 0.06                            | 0.07                          | 1.09                   |
| cell-cell signaling                            | 0.05                       | 0.06                            | 0.07                          | 0.3                    |
| cell differentiation                           | 0.05                       | 0.03                            | 0.04                          | 1.72                   |
| response to abiotic stimulus                   | 0.05                       |                                 | 0.04                          | 0.33                   |
| cell proliferation                             | 0.02                       | 0.03                            | 0.02                          | 0.14                   |
| response to biotic stimulus                    | 0.02                       | 0.03                            | 0.02                          | 0.2                    |
| cell growth                                    | 0.02                       |                                 | 0.02                          | 0.05                   |
| <b>MOLECULAR FUNCTIONS</b>                     |                            |                                 |                               |                        |
| molecular_function                             | 16.31                      | 15.99                           | 16.52                         | 11.08                  |
| catalytic activity                             | 10.85                      | 10.2                            | 11.1                          | 6.45                   |
| transferase activity                           | 3.49                       | 2.94                            | 3.65                          | 2.38                   |
| hydrolase activity                             | 3                          | 3.23                            | 3.05                          | 1.82                   |
| binding                                        | 2.86                       | 3.17                            | 2.81                          | 2.4                    |
| transporter activity                           | 1.45                       | 1.41                            | 1.48                          | 1.28                   |
| kinase activity                                | 1.07                       | 0.89                            | 1.02                          | 0.69                   |
| protein binding                                | 0.91                       | 0.98                            | 0.91                          | 1.05                   |
| enzyme regulator activity                      | 0.68                       | 0.72                            | 0.69                          | 0.41                   |
| signal transducer activity                     | 0.57                       | 0.49                            | 0.69                          | 0.81                   |
| nucleic acid binding                           | 0.52                       | 0.58                            | 0.46                          | 0.42                   |
| peptidase activity                             | 0.48                       | 0.52                            | 0.46                          | 0.17                   |
| receptor activity                              | 0.45                       | 0.37                            | 0.57                          | 0.65                   |
| nuclease activity                              | 0.41                       | 0.52                            | 0.42                          | 0.23                   |
| protein kinase activity                        | 0.34                       | 0.23                            | 0.31                          | 0.36                   |

|                                                   |      |      |      |      |
|---------------------------------------------------|------|------|------|------|
| ion channel activity                              | 0.32 | 0.35 | 0.33 | 0.27 |
| transcription regulator activity                  | 0.29 | 0.37 | 0.31 | 0.17 |
| DNA binding                                       | 0.27 | 0.29 | 0.22 | 0.16 |
| receptor binding                                  | 0.25 | 0.23 | 0.22 | 0.27 |
| lipid binding                                     | 0.23 | 0.26 | 0.22 | 0.12 |
| nucleotide binding                                | 0.18 | 0.2  | 0.2  | 0.07 |
| cytoskeletal protein binding                      | 0.14 | 0.17 | 0.13 | 0.15 |
| RNA binding                                       | 0.14 | 0.14 | 0.13 | 0.2  |
| structural molecule activity                      | 0.14 | 0.14 | 0.15 | 0.11 |
| carbohydrate binding                              | 0.11 | 0.12 | 0.11 | 0.06 |
| phosphoprotein phosphatase activity               | 0.09 | 0.12 | 0.09 | 0.09 |
| translation factor activity, nucleic acid binding | 0.09 | 0.12 | 0.09 | 0.04 |
| antioxidant activity                              | 0.09 | 0.12 | 0.09 | 0.05 |
| translation regulator activity                    | 0.09 | 0.12 | 0.09 | 0.06 |
| chromatin binding                                 | 0.05 | 0.06 | 0.04 | 0.03 |
| motor activity                                    | 0.05 | 0.06 | 0.04 | 0.03 |
| actin binding                                     | 0.05 | 0.06 | 0.04 | 0.02 |
| transcription factor activity                     | 0.02 | 0.03 | 0.02 | 0.01 |
| neurotransmitter transporter activity             | 0.02 | 0.03 | 0.02 | 0.04 |
| calcium ion binding                               | 0.02 | 0.03 | 0.02 | 0.01 |
| oxygen binding                                    | 0.02 |      | 0.02 | 0.01 |

#### CELLULAR LOCATION

|                                  |      |      |      |      |
|----------------------------------|------|------|------|------|
| cellular_component               | 3.83 | 4.06 | 3.69 | 3.54 |
| cell                             | 3.59 | 3.77 | 3.47 | 3.36 |
| intracellular                    | 3.02 | 3.17 | 2.87 | 2.66 |
| cytoplasm                        | 1.52 | 1.67 | 1.41 | 1.2  |
| nucleus                          | 0.61 | 0.52 | 0.57 | 0.74 |
| mitochondrion                    | 0.29 | 0.37 | 0.31 | 0.24 |
| cytoskeleton                     | 0.27 | 0.32 | 0.29 | 0.39 |
| nucleoplasm                      | 0.27 | 0.23 | 0.27 | 0.31 |
| plasma membrane                  | 0.25 | 0.26 | 0.24 | 0.35 |
| chromosome                       | 0.2  | 0.26 | 0.2  | 0.34 |
| endoplasmic reticulum            | 0.2  | 0.26 | 0.18 | 0.11 |
| Golgi apparatus                  | 0.18 | 0.23 | 0.18 | 0.12 |
| extracellular region             | 0.14 | 0.14 | 0.13 | 0.12 |
| cytosol                          | 0.09 | 0.12 | 0.09 | 0.09 |
| ribosome                         | 0.09 | 0.06 | 0.09 | 0.04 |
| nuclear chromosome               | 0.07 | 0.09 | 0.07 | 0.12 |
| vacuole                          | 0.07 | 0.09 | 0.07 | 0.04 |
| peroxisome                       | 0.07 | 0.09 | 0.07 | 0.02 |
| external encapsulating structure | 0.02 | 0.06 | 0.04 | 0.02 |
| cell envelope                    | 0.02 | 0.06 | 0.04 | 0.01 |
| extracellular space              | 0.02 | 0.03 | 0.02 | 0.03 |
| nucleolus                        | 0.02 | 0.03 | 0.02 | 0.03 |
| lysosome                         | 0.02 | 0.03 | 0.02 | 0.02 |
| microtubule organizing center    | 0.02 | 0.03 | 0.02 | 0.08 |

**Table S7.** GO terms from *L. humile*-specific genes that are enriched relative to *D. melanogaster*, *A. mellifera*, and *N. vitripennis*.

| GO ID      | GO Term                                   | p-value  | Ontology Aspect | # Genes |
|------------|-------------------------------------------|----------|-----------------|---------|
| GO:0005623 | cell                                      | 5.72E-13 | Cell Loc        | 3396    |
| GO:0044464 | cell part                                 | 5.72E-13 | Cell Loc        | 3396    |
| GO:0005622 | intracellular                             | 2.44E-05 | Cell Loc        | 2134    |
| GO:0044456 | synapse part                              | 1.96E-04 | Cell Loc        | 43      |
| GO:0045202 | synapse                                   | 1.96E-04 | Cell Loc        | 43      |
| GO:0045211 | postsynaptic membrane                     | 4.47E-04 | Cell Loc        | 41      |
| GO:0043167 | ion binding                               | 1.63E-20 | Molc Fxn        | 1463    |
| GO:0043169 | cation binding                            | 1.63E-20 | Molc Fxn        | 1463    |
| GO:0046872 | metal ion binding                         | 1.14E-19 | Molc Fxn        | 1424    |
| GO:0005509 | calcium ion binding                       | 8.41E-16 | Molc Fxn        | 245     |
| GO:0008270 | zinc ion binding                          | 2.96E-09 | Molc Fxn        | 892     |
| GO:0046914 | transition metal ion binding              | 1.87E-08 | Molc Fxn        | 1119    |
| GO:0004674 | protein serine/threonine kinase activity  | 1.68E-07 | Molc Fxn        | 201     |
| GO:0004803 | transposase activity                      | 6.51E-05 | Molc Fxn        | 29      |
| GO:0004623 | phospholipase A2 activity                 | 8.76E-05 | Molc Fxn        | 36      |
| GO:0005488 | binding                                   | 1.98E-04 | Molc Fxn        | 4713    |
| GO:0004190 | aspartic-type endopeptidase activity      | 4.06E-04 | Molc Fxn        | 34      |
| GO:0070001 | aspartic-type peptidase activity          | 4.06E-04 | Molc Fxn        | 34      |
| GO:0004091 | carboxylesterase activity                 | 2.04E-03 | Molc Fxn        | 44      |
| GO:0004620 | phospholipase activity                    | 2.37E-03 | Molc Fxn        | 48      |
| GO:0016298 | lipase activity                           | 8.88E-03 | Molc Fxn        | 55      |
| GO:0016042 | lipid catabolic process                   | 1.59E-05 | Biol Proc       | 42      |
| GO:0006313 | transposition, DNA-mediated               | 8.45E-05 | Biol Proc       | 29      |
| GO:0032196 | transposition                             | 8.45E-05 | Biol Proc       | 29      |
| GO:0007165 | signal transduction                       | 1.36E-04 | Biol Proc       | 502     |
| GO:0007154 | cell communication                        | 1.95E-04 | Biol Proc       | 534     |
| GO:0007264 | small GTPase mediated signal transduction | 7.17E-04 | Biol Proc       | 92      |
| GO:0032501 | multicellular organismal process          | 9.12E-03 | Biol Proc       | 208     |
| GO:0050794 | regulation of cellular process            | 2.71E-02 | Biol Proc       | 1075    |
| GO:0065007 | biological regulation                     | 3.11E-02 | Biol Proc       | 1075    |
| GO:0006644 | phospholipid metabolic process            | 3.77E-02 | Biol Proc       | 71      |
| GO:0019637 | organophosphate metabolic process         | 4.88E-02 | Biol Proc       | 78      |
| GO:0007242 | intracellular signaling cascade           | 2.13E-02 | Biol Proc       | 195     |

**Table S5.** KEGG automated annotation server (KAAS) annotation results. The total number of nodes in KEGG pathways were manually tallied and used to calculate percent coverage for each pathway. Individual KEGG pathway maps are available from [http://genomes.arc.georgetown.edu/drupal/linepithema/?q=genome\\_consortium\\_datasets](http://genomes.arc.georgetown.edu/drupal/linepithema/?q=genome_consortium_datasets)

| KEGG Map # | Pathway Name                                        | Total # of KEGG nodes | # <i>L. humile</i> OGS1.1 Genes Mapped to Map | % Pathway Coverage |
|------------|-----------------------------------------------------|-----------------------|-----------------------------------------------|--------------------|
| 10         | Glycolysis / Gluconeogenesis                        | 52                    | 24                                            | 44.2               |
| 20         | Citrate cycle (TCA cycle)                           | 27                    | 22                                            | 85.2               |
| 30         | Pentose phosphate pathway                           | 42                    | 15                                            | 35.7               |
| 40         | Pentose and glucuronate interconversions            | 61                    | 9                                             | 14.8               |
| 51         | Fructose and mannose metabolism                     | 70                    | 16                                            | 21.4               |
| 52         | Galactose metabolism                                | 50                    | 11                                            | 22.0               |
| 53         | Ascorbate and aldarate metabolism                   | 53                    | 4                                             | 7.5                |
| 61         | Fatty acid biosynthesis                             | 178                   | 5                                             | 2.8                |
| 62         | Fatty acid elongation in mitochondria               | 34                    | 6                                             | 17.6               |
| 71         | Fatty acid metabolism                               | 83                    | 18                                            | 21.7               |
| 72         | Synthesis and degradation of ketone bodies          | 6                     | 5                                             | 83.3               |
| 100        | Steroid biosynthesis                                | 72                    | 4                                             | 4.2                |
| 120        | Primary bile acid biosynthesis                      | 46                    | 3                                             | 6.5                |
| 130        | Ubiquinone and other terpenoid-quinone biosynthesis | 27                    | 8                                             | 25.9               |
| 140        | Steroid hormone biosynthesis                        | 134                   | 4                                             | 2.2                |
| 190        | Oxidative phosphorylation                           | 189                   | 79                                            | 42.3               |
| 195        | Photosynthesis                                      | 65                    | 0                                             | 0.0                |
| 230        | Purine metabolism                                   | 167                   | 80                                            | 50.3               |
| 232        | Caffeine metabolism                                 | 28                    | 1                                             | 7.1                |
| 240        | Pyrimidine metabolism                               | 106                   | 62                                            | 60.4               |
| 250        | Alanine, aspartate and glutamate metabolism         | 45                    | 21                                            | 46.7               |
| 260        | Glycine, serine and threonine metabolism            | 71                    | 19                                            | 25.4               |
| 270        | Cysteine and methionine metabolism                  | 82                    | 16                                            | 19.5               |
| 280        | Valine, leucine and isoleucine degradation          | 56                    | 26                                            | 46.4               |
| 281        | Geraniol degradation                                | 17                    | 0                                             | 0.0                |
| 290        | Valine, leucine and isoleucine biosynthesis         | 33                    | 7                                             | 21.2               |
| 300        | Lysine biosynthesis                                 | 37                    | 5                                             | 16.2               |
| 310        | Lysine degradation                                  | 61                    | 21                                            | 34.4               |



|     |                                                                 |     |    |       |
|-----|-----------------------------------------------------------------|-----|----|-------|
| 330 | Arginine and proline metabolism                                 | 59  | 23 | 39.0  |
| 340 | Histidine metabolism                                            | 42  | 5  | 9.5   |
| 350 | Tyrosine metabolism                                             | 111 | 15 | 12.6  |
| 351 | 1,1,1-Trichloro-2,2-bis(4-chlorophenyl)ethane (DDT) degradation | 12  | 1  | 8.3   |
| 360 | Phenylalanine metabolism                                        | 52  | 9  | 13.5  |
| 361 | gamma-Hexachlorocyclohexane degradation                         | 40  | 6  | 15.0  |
| 362 | Benzoate degradation via hydroxylation                          | 58  | 3  | 6.9   |
| 363 | Bisphenol A degradation                                         | 16  | 2  | 6.3   |
| 380 | Tryptophan metabolism                                           | 78  | 13 | 16.7  |
| 400 | Phenylalanine, tyrosine and tryptophan biosynthesis             | 45  | 3  | 6.7   |
| 401 | Novobiocin biosynthesis                                         | 35  | 2  | 5.7   |
| 410 | beta-Alanine metabolism                                         | 36  | 13 | 36.1  |
| 430 | Taurine and hypotaurine metabolism                              | 20  | 4  | 20.0  |
| 440 | Phosphonate and phosphinate metabolism                          | 15  | 3  | 26.7  |
| 450 | Selenoamino acid metabolism                                     | 22  | 9  | 40.9  |
| 460 | Cyanoamino acid metabolism                                      | 21  | 3  | 9.5   |
| 471 | D-Glutamine and D-glutamate metabolism                          | 13  | 2  | 15.4  |
| 480 | Glutathione metabolism                                          | 61  | 18 | 31.1  |
| 500 | Starch and sucrose metabolism                                   | 90  | 17 | 17.8  |
| 510 | N-Glycan biosynthesis                                           | 38  | 32 | 84.2  |
| 511 | Other glycan degradation                                        | 9   | 9  | 100.0 |
| 512 | O-Glycan biosynthesis                                           | 14  | 2  | 14.3  |
| 513 | High-mannose type N-glycan biosynthesis                         | 15  | 1  | 6.7   |
| 514 | O-Mannosyl glycan biosynthesis                                  | 13  | 1  | 7.7   |
| 520 | Amino sugar and nucleotide sugar metabolism                     | 40  | 25 | 62.5  |
| 521 | Streptomycin biosynthesis                                       | 16  | 6  | 37.5  |
| 523 | Polyketide sugar unit biosynthesis                              | 32  | 1  | 3.1   |
| 524 | Butirosin and neomycin biosynthesis                             | 25  | 1  | 4.0   |
| 531 | Glycosaminoglycan degradation                                   | 21  | 11 | 52.4  |
| 532 | Chondroitin sulfate biosynthesis                                | 18  | 7  | 38.9  |
| 533 | Keratan sulfate biosynthesis                                    | 19  | 2  | 10.5  |
| 534 | Heparan sulfate biosynthesis                                    | 30  | 10 | 36.7  |
| 561 | Glycerolipid metabolism                                         | 42  | 18 | 38.1  |
| 562 | Inositol phosphate metabolism                                   | 38  | 23 | 57.9  |
| 563 | Glycosylphosphatidylinositol (GPI)-anchor biosynthesis          | 23  | 15 | 69.6  |

|     |                                                            |    |    |      |
|-----|------------------------------------------------------------|----|----|------|
| 564 | Glycerophospholipid metabolism                             | 70 | 33 | 44.3 |
| 565 | Ether lipid metabolism                                     | 31 | 7  | 22.6 |
| 590 | Arachidonic acid metabolism                                | 55 | 5  | 12.7 |
| 591 | Linoleic acid metabolism                                   | 15 | 3  | 20.0 |
| 592 | alpha-Linolenic acid metabolism                            | 25 | 2  | 8.0  |
| 600 | Sphingolipid metabolism                                    | 46 | 16 | 34.8 |
| 601 | Glycosphingolipid biosynthesis - lacto and neolacto series | 16 | 3  | 12.5 |
| 603 | Glycosphingolipid biosynthesis - globo series              | 19 | 3  | 15.8 |
| 604 | Glycosphingolipid biosynthesis - ganglio series            | 38 | 2  | 5.3  |
| 620 | Pyruvate metabolism                                        | 73 | 22 | 30.1 |
| 623 | 2,4-Dichlorobenzoate degradation                           | 33 | 1  | 0.0  |
| 624 | 1- and 2-Methylnaphthalene degradation                     | 37 | 4  | 10.8 |
| 625 | Tetrachloroethene degradation                              | 11 | 1  | 0.0  |
| 626 | Naphthalene and anthracene degradation                     | 47 | 3  | 6.4  |
| 628 | Fluorene degradation                                       | 28 | 1  | 3.6  |
| 630 | Glyoxylate and dicarboxylate metabolism                    | 63 | 10 | 19.0 |
| 631 | 1,2-Dichloroethane degradation                             | 5  | 1  | 20.0 |
| 632 | Benzoate degradation via CoA ligation                      | 54 | 8  | 16.7 |
| 633 | Trinitrotoluene degradation                                | 15 | 0  | 6.7  |
| 640 | Propanoate metabolism                                      | 53 | 15 | 28.3 |
| 641 | 3-Chloroacrylic acid degradation                           | 9  | 3  | 33.3 |
| 642 | Ethylbenzene degradation                                   | 19 | 1  | 5.3  |
| 643 | Styrene degradation                                        | 26 | 4  | 11.5 |
| 650 | Butanoate metabolism                                       | 53 | 16 | 30.2 |
| 660 | C5-Branched dibasic acid metabolism                        | 19 | 1  | 5.3  |
| 670 | One carbon pool by folate                                  | 28 | 12 | 42.9 |
| 680 | Methane metabolism                                         | 34 | 6  | 20.6 |
| 710 | Carbon fixation in photosynthetic organisms                | 35 | 13 | 37.1 |
| 720 | Reductive carboxylate cycle CO2                            | 14 | 7  | 50.0 |
| 730 | Thiamine metabolism                                        | 25 | 3  | 12.0 |
| 740 | Riboflavin metabolism                                      | 16 | 4  | 25.0 |
| 750 | Vitamin B6                                                 | 35 | 4  | 8.6  |
| 760 | Nicotinate and nicotinamide metabolism                     | 58 | 6  | 12.1 |
| 770 | Pantothenate and CoA biosynthesis                          | 29 | 7  | 27.6 |
| 780 | Biotin metabolism                                          | 17 | 2  | 11.8 |
| 785 | Lipoic acid metabolism                                     | 8  | 3  | 37.5 |

|      |                                                        |     |     |       |
|------|--------------------------------------------------------|-----|-----|-------|
| 790  | Folate biosynthesis                                    | 35  | 8   | 22.9  |
| 830  | Retinol metabolism                                     | 41  | 6   | 12.2  |
| 860  | Porphyrin and chlorophyll metabolism                   | 86  | 17  | 19.8  |
| 900  | Terpenoid backbone biosynthesis                        | 22  | 11  | 45.5  |
| 901  | Indole alkaloid biosynthesis                           | 28  | 1   | 3.6   |
| 903  | Limonene and pinene degradation                        | 39  | 6   | 20.5  |
| 908  | Zeatin biosynthesis                                    | 16  | 1   | 6.3   |
| 910  | Nitrogen metabolism                                    | 69  | 9   | 13.0  |
| 920  | Sulfur metabolism                                      | 29  | 4   | 13.8  |
| 930  | Caprolactam degradation                                | 23  | 3   | 13.0  |
| 940  | Phenylpropanoid biosynthesis                           | 70  | 2   | 1.4   |
| 944  | Flavone and flavonol biosynthesis                      | 32  | 1   | 3.1   |
| 945  | Stilbenoid, diarylheptanoid and gingerol biosynthesis  | 25  | 1   | 4.0   |
| 950  | Isoquinoline alkaloid biosynthesis                     | 48  | 4   | 8.3   |
| 960  | Tropane, piperidine and pyridine alkaloid biosynthesis | 19  | 5   | 21.1  |
| 965  | Betalain biosynthesis                                  | 15  | 1   | 6.7   |
| 970  | Aminoacyl-tRNA biosynthesis                            | 21  | 25  | 119.0 |
| 980  | Metabolism of xenobiotics by cytochrome P450           | 36  | 6   | 13.9  |
| 981  | Insect hormone biosynthesis                            | 21  | 5   | 28.6  |
| 982  | Drug metabolism - cytochrome P450                      | 60  | 6   | 8.3   |
| 983  | Drug metabolism - other enzymes                        | 32  | 16  | 50.0  |
| 1040 | Biosynthesis of unsaturated fatty acids                | 28  | 6   | 28.6  |
| 1051 | Biosynthesis of ansamycins                             | 39  | 1   | 2.6   |
| 1055 | Biosynthesis of vancomycin group antibiotics           | 34  | 1   | 2.9   |
| 2010 | ABC transporters                                       | 304 | 10  | 3.6   |
| 2020 | Two-component system                                   | 249 | 4   | 1.6   |
| 3010 | Ribosome                                               | 143 | 83  | 60.1  |
| 3018 | RNA degradation                                        | 71  | 47  | 64.8  |
| 3020 | RNA polymerase                                         | 46  | 24  | 52.2  |
| 3022 | Basal transcription factors                            | 26  | 23  | 88.5  |
| 3030 | DNA replication                                        | 46  | 31  | 65.2  |
| 3040 | Spliceosome                                            | 77  | 101 | 131.2 |
| 3050 | Proteasome                                             | 52  | 35  | 65.4  |
| 3060 | Protein export                                         | 23  | 21  | 82.6  |
| 3070 | Bacterial secretion system                             | 21  | 2   | 9.5   |
| 3320 | PPAR signaling pathway                                 | 53  | 14  | 26.4  |
| 3410 | Base excision repair                                   | 60  | 21  | 35.0  |

|      |                                           |     |    |      |
|------|-------------------------------------------|-----|----|------|
| 3420 | Nucleotide excision repair                | 51  | 34 | 66.7 |
| 3430 | Mismatch repair                           | 30  | 17 | 53.3 |
| 3440 | Homologous recombination                  | 55  | 18 | 34.5 |
| 3450 | Non-homologous end-joining                | 20  | 7  | 30.0 |
| 4010 | MAPK signaling pathway                    | 125 | 60 | 47.2 |
| 4011 | MAPK signaling pathway - yeast            | 57  | 8  | 15.8 |
| 4012 | ErbB signaling pathway                    | 60  | 26 | 41.7 |
| 4013 | MAPK signaling pathway - fly              | 30  | 15 | 43.3 |
| 4020 | Calcium signaling pathway                 | 48  | 28 | 60.4 |
| 4060 | Cytokine-cytokine receptor interaction    | 299 | 7  | 2.0  |
| 4062 | Chemokine signaling pathway               | 50  | 35 | 70.0 |
| 4070 | Phosphatidylinositol signaling system     | 43  | 23 | 51.2 |
| 4080 | Neuroactive ligand-receptor interaction   | 90  | 26 | 28.9 |
| 4110 | Cell cycle                                | 81  | 68 | 82.7 |
| 4111 | Cell cycle - yeast                        | 118 | 55 | 44.9 |
| 4112 | Cell cycle - Caulobacter                  | 31  | 2  | 6.5  |
| 4114 | Oocyte meiosis                            | 72  | 43 | 59.7 |
| 4115 | p53 signaling pathway                     | 60  | 19 | 30.0 |
| 4120 | Ubiquitin mediated proteolysis            | 109 | 78 | 70.6 |
| 4130 | SNARE interactions in vesicular transport | 35  | 20 | 54.3 |
| 4140 | Regulation of autophagy                   | 23  | 11 | 39.1 |
| 4142 | Lysosome                                  | 67  | 51 | 76.1 |
| 4144 | Endocytosis                               | 97  | 67 | 67.0 |
| 4146 | Peroxisome                                | 64  | 44 | 68.8 |
| 4150 | mTOR signaling pathway                    | 30  | 21 | 70.0 |
| 4210 | Apoptosis                                 | 60  | 16 | 23.3 |
| 4260 | Cardiac muscle contraction                | 23  | 19 | 87.0 |
| 4270 | Vascular smooth muscle contraction        | 46  | 24 | 56.5 |
| 4310 | Wnt signaling pathway                     | 71  | 54 | 73.2 |
| 4320 | Dorso-ventral axis formation              | 27  | 17 | 63.0 |
| 4330 | Notch signaling pathway                   | 24  | 19 | 83.3 |
| 4340 | Hedgehog signaling pathway                | 19  | 19 | 89.5 |
| 4350 | TGF-beta signaling pathway                | 55  | 27 | 47.3 |
| 4360 | Axon guidance                             | 79  | 29 | 38.0 |
| 4370 | VEGF signaling pathway                    | 28  | 17 | 64.3 |
| 4510 | Focal adhesion                            | 60  | 46 | 78.3 |
| 4512 | ECM-receptor interaction                  | 116 | 12 | 10.3 |
| 4514 | Cell adhesion molecules (CAMs)            | 21  | 4  | 23.8 |
| 4520 | Adherens junction                         | 74  | 25 | 33.8 |
| 4530 | Tight junction                            | 56  | 31 | 55.4 |
| 4540 | Gap junction                              | 43  | 21 | 51.2 |
| 4610 | Complement and coagulation cascades       | 49  | 2  | 4.1  |

|      |                                              |     |    |       |
|------|----------------------------------------------|-----|----|-------|
| 4612 | Antigen processing and presentation          | 42  | 12 | 26.2  |
| 4614 | Renin-angiotensin system                     | 21  | 3  | 14.3  |
| 4620 | Toll-like receptor signaling pathway         | 78  | 19 | 21.8  |
| 4621 | NOD-like receptor signaling pathway          | 56  | 13 | 21.4  |
| 4622 | RIG-I-like receptor signaling pathway        | 52  | 12 | 19.2  |
| 4623 | Cytosolic DNA-sensing pathway                | 33  | 9  | 27.3  |
| 4626 | Plant-pathogen interaction                   | 74  | 7  | 9.5   |
| 4630 | Jak-STAT signaling pathway                   | 27  | 16 | 55.6  |
| 4640 | Hematopoietic cell lineage                   | 140 | 2  | 1.4   |
| 4650 | Natural killer cell mediated cytotoxicity    | 82  | 16 | 20.7  |
| 4660 | T cell receptor signaling pathway            | 59  | 25 | 39.0  |
| 4662 | B cell receptor signaling pathway            | 38  | 17 | 39.5  |
| 4664 | Fc epsilon RI signaling pathway              | 40  | 16 | 40.0  |
| 4666 | Fc gamma R-mediated phagocytosis             | 47  | 26 | 57.4  |
| 4670 | Leukocyte transendothelial migration         | 79  | 22 | 29.1  |
| 4672 | Intestinal immune network for IgA production | 55  | 0  | 1.8   |
| 4710 | Circadian rhythm - mammal                    | 14  | 5  | 28.6  |
| 4711 | Circadian rhythm - fly                       | 17  | 7  | 41.2  |
| 4712 | Circadian rhythm - plant                     | 35  | 2  | 5.7   |
| 4720 | Long-term potentiation                       | 25  | 17 | 68.0  |
| 4722 | Neurotrophin signaling pathway               | 77  | 38 | 44.2  |
| 4730 | Long-term depression                         | 34  | 17 | 52.9  |
| 4740 | Olfactory transduction                       | 15  | 6  | 33.3  |
| 4742 | Taste transduction                           | 28  | 3  | 14.3  |
| 4810 | Regulation of actin cytoskeleton             | 71  | 45 | 67.6  |
| 4910 | Insulin signaling pathway                    | 63  | 46 | 71.4  |
| 4912 | GnRH signaling pathway                       | 40  | 25 | 62.5  |
| 4914 | Progesterone-mediated oocyte maturation      | 39  | 34 | 84.6  |
| 4916 | Melanogenesis                                | 38  | 28 | 73.7  |
| 4920 | Adipocytokine signaling pathway              | 37  | 15 | 37.8  |
| 4930 | Type II diabetes mellitus                    | 25  | 11 | 40.0  |
| 4940 | Type I diabetes mellitus                     | 23  | 3  | 13.0  |
| 4950 | Maturity onset diabetes of the young         | 42  | 6  | 11.9  |
| 4960 | Aldosterone-regulated sodium reabsorption    | 19  | 11 | 57.9  |
| 4962 | Vasopressin-regulated water reabsorption     | 23  | 22 | 100.0 |

|      |                                                            |     |     |       |
|------|------------------------------------------------------------|-----|-----|-------|
| 4964 | Proximal tubule bicarbonate reclamation                    | 13  | 7   | 53.8  |
| 5010 | Alzheimer's disease                                        | 26  | 80  | 303.8 |
| 5012 | Parkinson's disease                                        | 38  | 68  | 178.9 |
| 5014 | Amyotrophic lateral sclerosis (ALS)                        | 40  | 17  | 42.5  |
| 5016 | Huntington's disease                                       | 64  | 100 | 156.3 |
| 5020 | Prion diseases                                             | 57  | 8   | 14.0  |
| 5110 | Vibrio cholerae infection                                  | 39  | 26  | 66.7  |
| 5120 | Epithelial cell signaling in Helicobacter pylori infection | 50  | 27  | 52.0  |
| 5130 | Pathogenic Escherichia coli infection                      | 47  | 16  | 34.0  |
| 5140 | Leishmania infection                                       | 50  | 9   | 18.0  |
| 5200 | Pathways in cancer                                         | 210 | 92  | 43.8  |
| 5210 | Colorectal cancer                                          | 51  | 22  | 43.1  |
| 5211 | Renal cell carcinoma                                       | 50  | 25  | 48.0  |
| 5212 | Pancreatic cancer                                          | 44  | 17  | 38.6  |
| 5213 | Endometrial cancer                                         | 33  | 19  | 60.6  |
| 5214 | Glioma                                                     | 58  | 17  | 31.0  |
| 5215 | Prostate cancer                                            | 43  | 23  | 53.5  |
| 5216 | Thyroid cancer                                             | 20  | 12  | 45.0  |
| 5217 | Basal cell carcinoma                                       | 20  | 18  | 85.0  |
| 5218 | Melanoma                                                   | 26  | 11  | 42.3  |
| 5219 | Bladder cancer                                             | 28  | 8   | 32.1  |
| 5220 | Chronic myeloid leukemia                                   | 45  | 21  | 46.7  |
| 5221 | Acute myeloid leukemia                                     | 35  | 13  | 37.1  |
| 5222 | Small cell lung cancer                                     | 37  | 22  | 56.8  |
| 5223 | Non-small cell lung cancer                                 | 39  | 16  | 41.0  |
| 5322 | Systemic lupus erythematosus                               | 50  | 11  | 22.0  |
| 5340 | Primary immunodeficiency                                   | 46  | 2   | 2.2   |
| 5410 | Hypertrophic cardiomyopathy (HCM)                          | 39  | 10  | 23.1  |
| 5412 | Arrhythmogenic right ventricular cardiomyopathy (ARVC)     | 59  | 9   | 15.3  |
| 5414 | Dilated cardiomyopathy (DCM)                               | 38  | 12  | 31.6  |
| 5416 | Viral myocarditis                                          | 37  | 8   | 24.3  |

**TOTALS**

**244**

**245**

### OrthoMCL

We used OrthoMCL v2.0 (53) to identify ortholog groups between between the three Hymenoptera species, *A. mellifera* (preOGS2 41), *N. vitripennis* (OGS1.2, 42), and *L. humile* (OGS1.1, this study) as well as *D. melanogaster* (Release 5.27, 54) OrthoMCL

also identified species-specific gene expansion families (inparalogs) based on BLASTP protein sequence similarity. To avoid complicating orthology-paralogy results, we first reduced each protein dataset using custom Perl scripts to contain only the single longest isoform when multiple isoforms were present. Next, the results from an all-by-all BLAST were parsed determine best reciprocal hits and MCL v09-308 Markov Clustering algorithm was used to define final ortholog, inparalog, and co-ortholog groupings. We used the suggested parameter values and options for OrthoMCL for all steps in the pipeline.

### Mitochondrial genome

Animal mitochondrial genomes are approximately 16Kb in length and typically contain 37 genes (55). The mitochondrial sequence of *L. humile* did not fully assemble in the v4.0 genome assembly; the longest scaffold of mitochondrial DNA was 5Kb long and

**Figure S1.** The Argentine ant mitochondrial genome. The general arrangement of the *L. humile* mitochondrial genome based on that of *A. mellifera*. Red dashed lines represent the approximate location of the ends of scaffolds

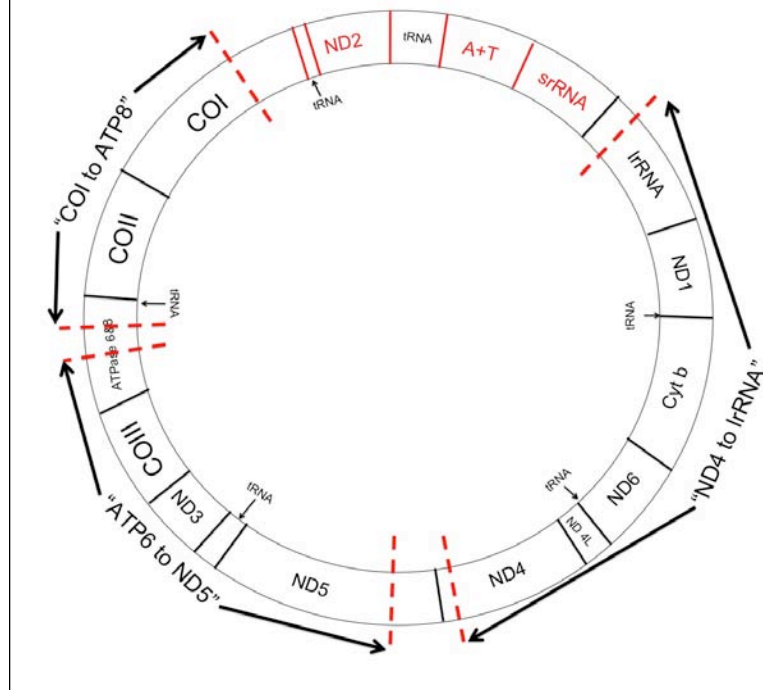

contained >8 genes (partial genes on either end). Using an iterative process of searching

the *L. humile* v4.0 scaffolds, contigs, transcriptome, raw sequencing reads, and *L. humile* mitochondrial sequences deposited at NCBI, we were able to assemble three large scaffolds covering an estimated 77% (12,516bp) of the mitochondrial genome (Fig. S1) (calculated using the *Apis mellifera ligustica* mitochondrial genome as a reference) (56). The program Sequencher v4.5 (Gene Codes Corp. 2005) was used to align and assemble fragments; all merged fragments had at least 20bp of overlap. This assembly at least partially covers 24 genes and there is EST support for 20. This includes 12 of the 13 protein coding genes, 11 of 22 tRNAs and one of the two ribosomal RNAs. The EST support and multiple genes covered by scaffolds is good evidence that none of the scaffolds included in this assembly are of nuclear origin (NuMts). We estimate that the three major scaffolds are separated by two short gaps and one large gap that includes the origin of replication (a highly repetitive AT-rich region) (Fig. S1). There is complete synteny within each scaffold with the *A. mellifera* mitochondrial genome, but without bridging gaps between scaffolds we are not able to judge larger scale synteny. Additionally, the *L. humile* mitochondrial genome appears more similar to *A. mellifera* than *N. vitripennis*, which contained an inversion that resulted in the juxtaposition of COI (+tRNA-L) and ND5 (57). In *L. humile* ND5 and ND3 were recovered within a single scaffold, confirming their proximity and the absence of the inversion seen in *N. vitripennis*.

### **GC Compositional Domain Analysis**

The DNA contains segments that have a characteristic GC-content that differ significantly from the GC-content of adjacent segments. These are referred to as compositional domains. Compositional domains that are compositionally more



homogeneous than the chromosome on which they reside are termed “compositionally homogeneous domains,” while a subset of long ( $\geq 300\text{kb}$ ) compositionally homogeneous domains retains the traditional name “isochores.” The isochore theory depicts the genome as a mosaic of long homogeneous domains (58); however, this description has been repeatedly refuted (59-61), and a new model has been proposed to describe the complex nature of the genome. The compositional-domain model portrays the genome as a mixture of short and long domains that may be homogeneous or nonhomogeneous in respect to the chromosome on which they reside. Indeed, in all animals studied so far, the distribution of compositional-domain lengths showed an abundance of short domains and a paucity of long ones. The genome of the *L. humile* is no exception in this respect (Table S9). The composition and organization of compositional domains was shaped by different evolutionary processes involving either fusion or fission of domains. By identifying compositional domains over multiple genomes, it is possible to track the evolutionary processes affecting compositional-domain architecture.

**Table S9.** Distribution of compositional domain lengths.

| Order       | Species                | Number of compositional domains in length group |                    |                   |                  | Total number | Assembly size (Mb) |
|-------------|------------------------|-------------------------------------------------|--------------------|-------------------|------------------|--------------|--------------------|
|             |                        | 1 kb - 10 kb (%)                                | 10 kb - 100 kb (%) | 100 kb - 1 Mb (%) | 1 Mb - 10 Mb (%) |              |                    |
| Hymenoptera | <i>L. humile</i>       | 31,978 (89)                                     | 3,755 (10.5)       | 188 (0.5)         | 0 (0)            | 35,921       | 250.8              |
|             | <i>A. mellifera</i>    | 42,006 (91.1)                                   | 3,944 (8.6)        | 150 (0.3)         | 0 (0)            | 46,100       | 230                |
|             | <i>N. vitripennis</i>  | 51,064 (92.8)                                   | 3,870 (7.0)        | 72 (0.1)          | 0 (0)            | 55,006       | 240                |
| Coleoptera  | <i>T. castaneum</i>    | 15,432 (90.0)                                   | 1,535 (8.9)        | 183 (1.1)         | 3 (0.02)         | 17,153       | 131                |
| Diptera     | <i>A. gambiae</i>      | 36,941 (91.5)                                   | 3,185 (7.9)        | 231 (0.6)         | 0 (0)            | 40,357       | 223                |
|             | <i>D. melanogaster</i> | 12,297 (85.3)                                   | 1,973 (13.7)       | 154 (1.1)         | 0 (0)            | 14,424       | 120                |

\*Number of non-ambiguous nucleotides in the assembly

Recursive segmentation procedures that partition genomic sequences into compositional domains have been shown to be the most accurate segmentation methods (60, 62). Here, we partitioned the genomic sequences into compositional domains using *IsoPlotter*, a segmentation algorithm that employs a dynamic halting criterion (60). *IsoPlotter* recursively segments the chromosomes by maximizing the difference in GC content between adjacent subsequences. The process of segmentation was terminated when the difference in GC content between two neighboring segments was no longer statistically significant.

We carried out four analyses to study genome architecture in insects. In the first analysis, we calculated the distribution of compositional-domain lengths. For convenience, compositional domains were divided by the order of magnitude of their lengths into short ( $10^3$ - $10^4$  bp), medium ( $10^4$ - $10^5$  bp), and long ( $10^5$ - $10^7$  bp). We, next, tested whether the lengths of compositional domains follow a power-law distribution. The minimum domain length and the power-law exponent were estimated using the method of Clauset, Shalizi, and Newman (63). To test the power-law hypothesis, the observed data were compared to data generated from a power-law distribution and the similarity between the two distributions was calculated using the Kolmogorov-Smirnov statistic (64). Based on the observed goodness-of-fit, we calculated a  $p$ -value that quantifies the probability that the data were drawn from the hypothesized distribution. We used the Matlab scripts provided by Clauset, Shalizi, and Newman (63) at <http://www.santafe.edu/~aaronc/powerlaws/>. In the third analysis, we compared the distributions of GC contents of compositional domains. Finally, we compared the compositional-domain GC contents versus their lengths in a log scale.

We computed the genomic distribution of the ratio of observed to expected CpG dinucleotides (CpG(O/E)) by computing CpG(O/E) for each compositional domain and then determining the total number of nucleotides for compositional domains with equivalent CpG(O/E). CpG(O/E) is defined as  $CpG(O/E) = PCpG/(PC*PG)$ , where PCpG, Pc and PG are the frequencies of CpG dinucleotides, C nucleotides, and G nucleotides, respectively. We also computed the distribution of CpG(O/E) for coding exons and introns, after concatenating coding exons or introns, respectively, for each gene.

We also completed a CpG(O/E) analysis of the genome using a 1kb sliding window over the genome sequence similar to Elango et al (Figure S5). Overall this method produced a distribution comparable to the CpG(O/E) analysis performed on compositional domains.

**Figure S5. Dinucleotide NpN Observed/Expected (OE) analysis using 1kb sliding window across genomic scaffolds.**

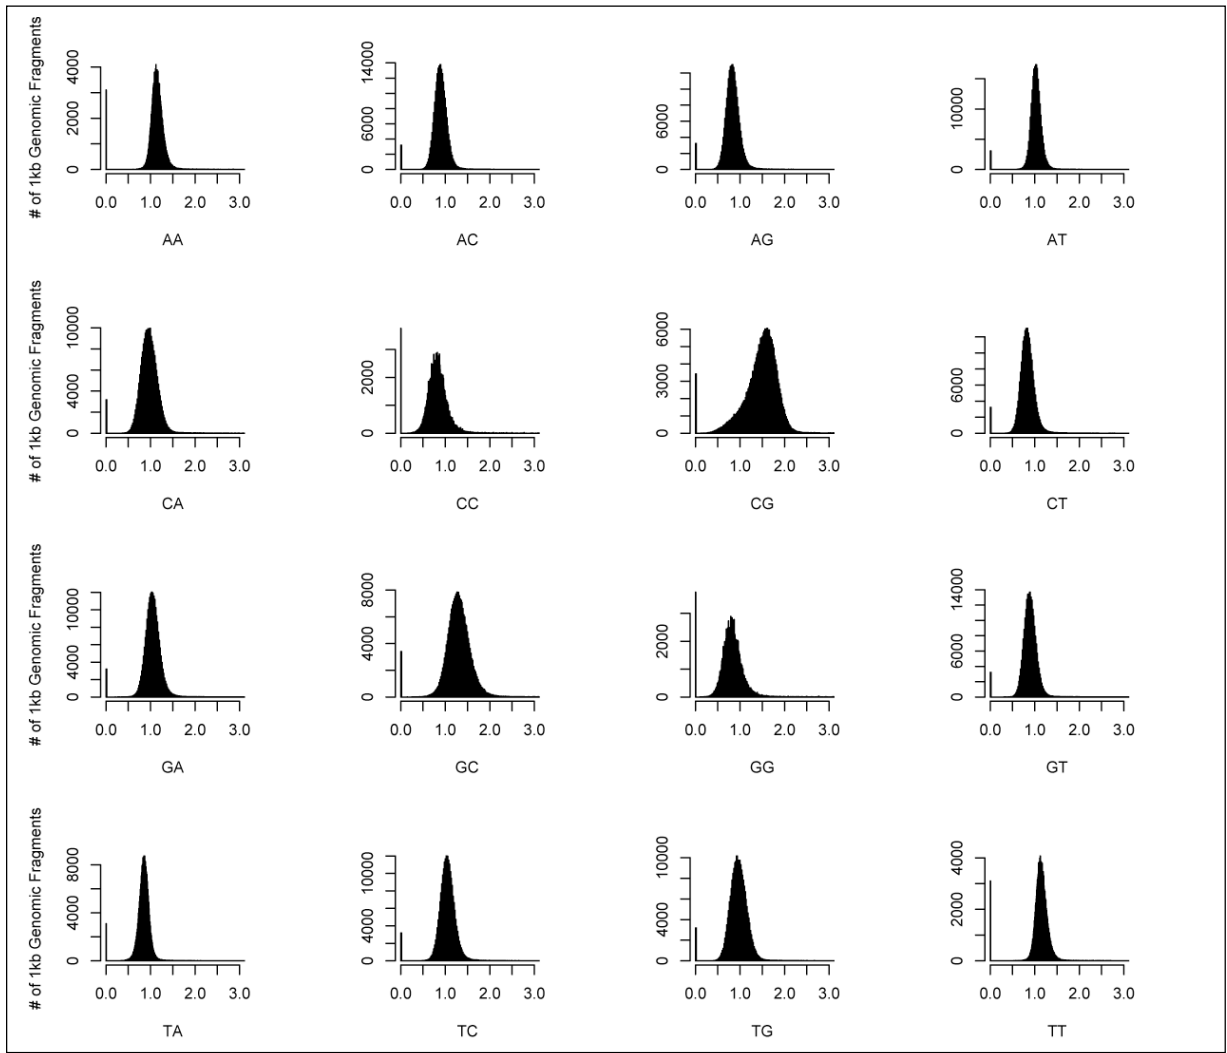

**Figure S6. Dinucleotide NpN Observed/Expected (OE) analysis for OGS1.1 genes.**

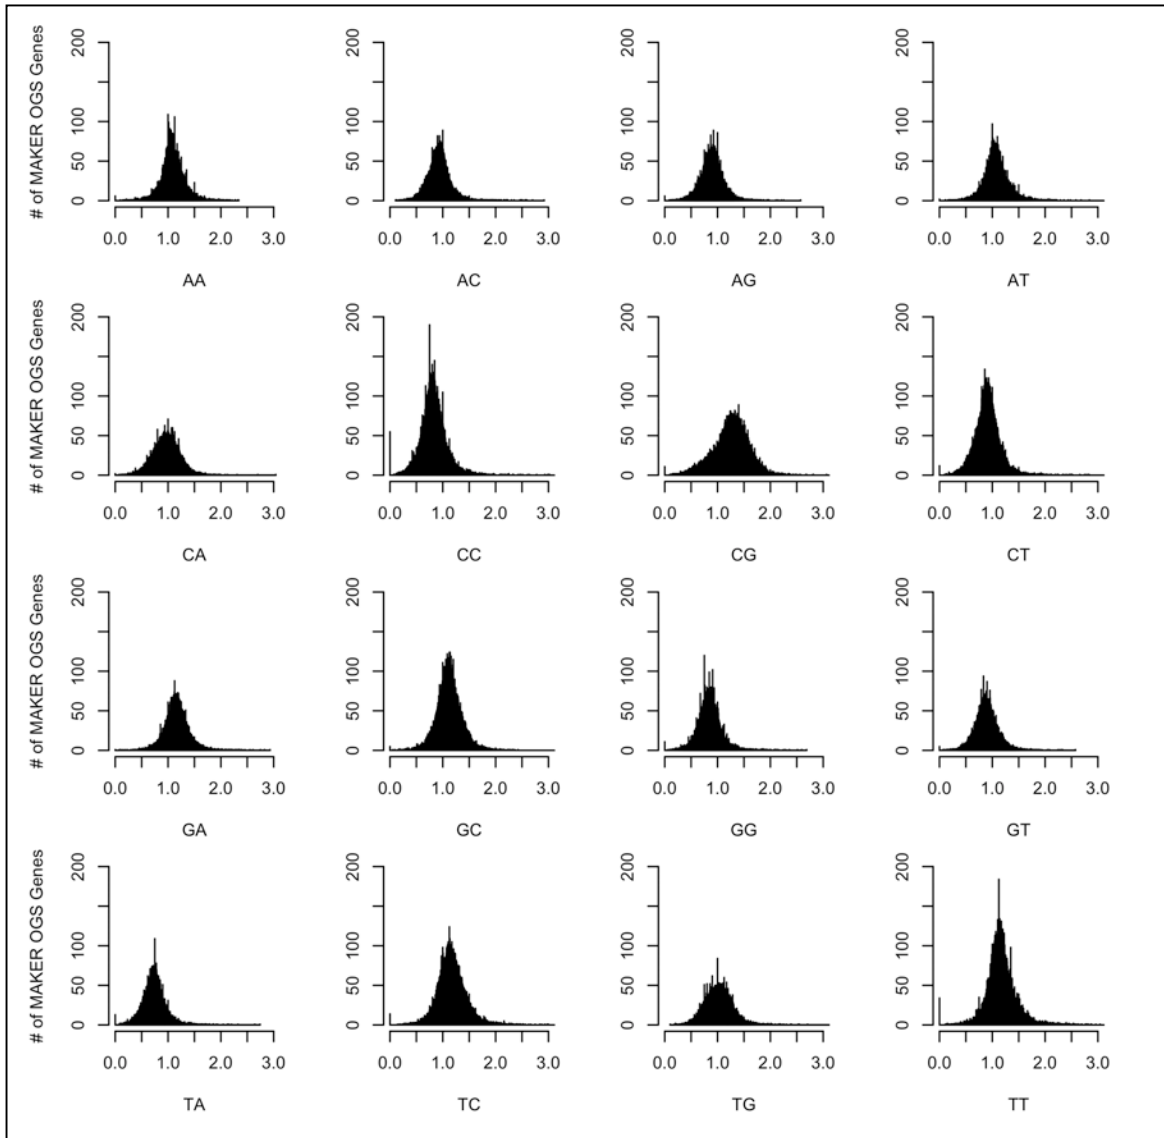

**Figure S7.** Compositional domain GC content versus compositional domain lengths on a log scale. The middle horizontal line (solid red) represents the mean genome GC content within margins of  $\pm 5\%$  (dashed black).

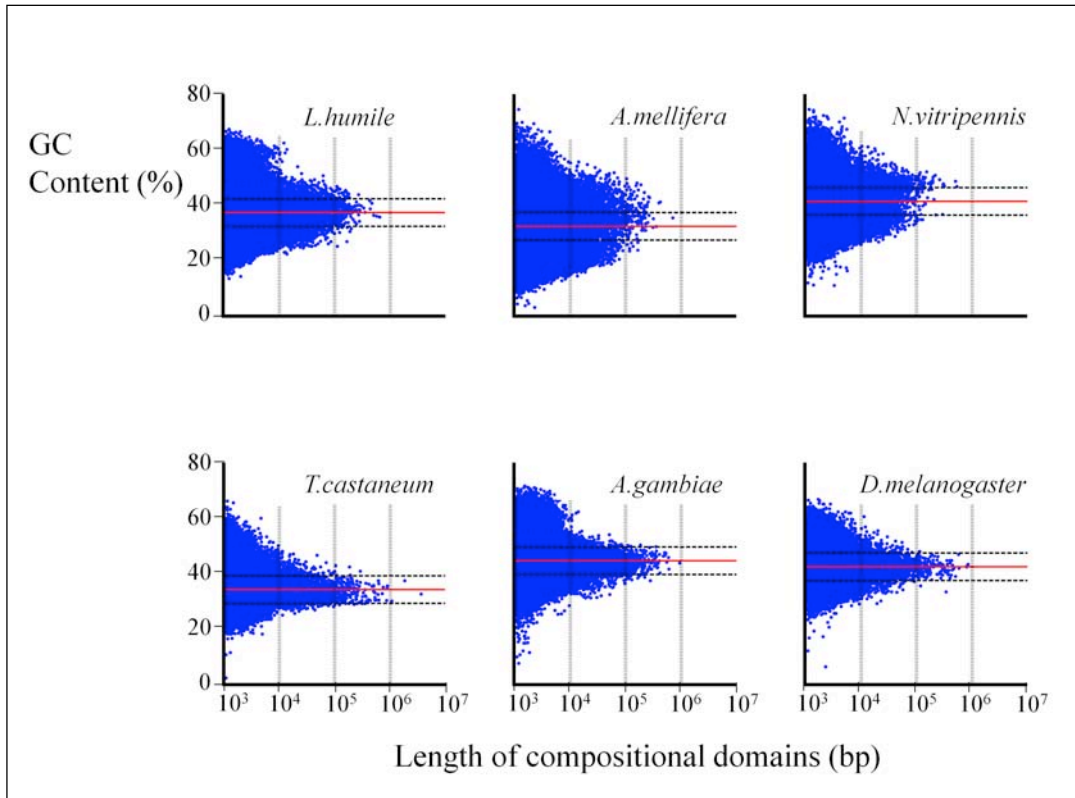

**Figure S8.** Comparison of GC content of compositional domains in the *L. humile*, *A. mellifera*, *N. vitripennis* and *D. melanogaster*. Cumulative distributions show the fraction of nucleotides in compositional domains containing genes (thick lines) or all genomic compositional domains (thin lines) ( $< x$  GC%). Similar to the other hymenopterans, *L. humile* genes tend to occur in the AT-rich parts of the genome.

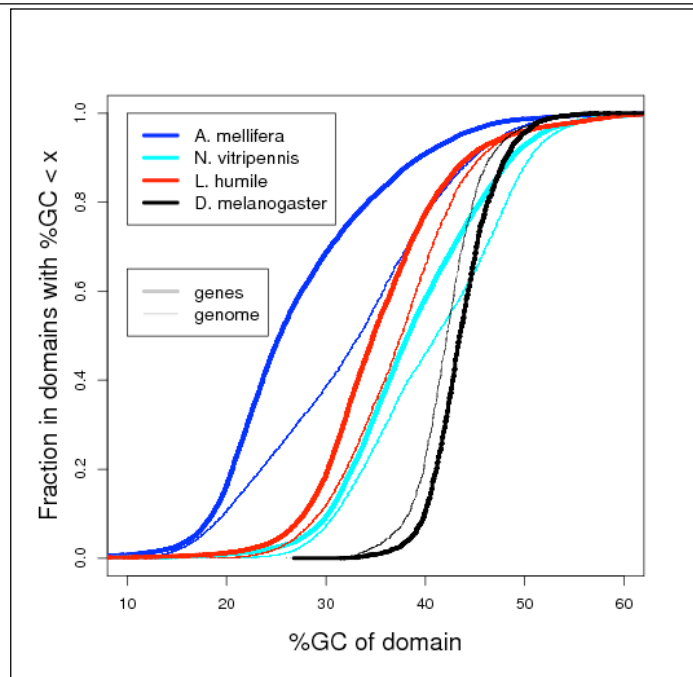

**Figure S9.** Distribution of GC content in compositional domains, introns and coding exons of *A. mellifera*, *L. humile* and *N. vitripennis*.

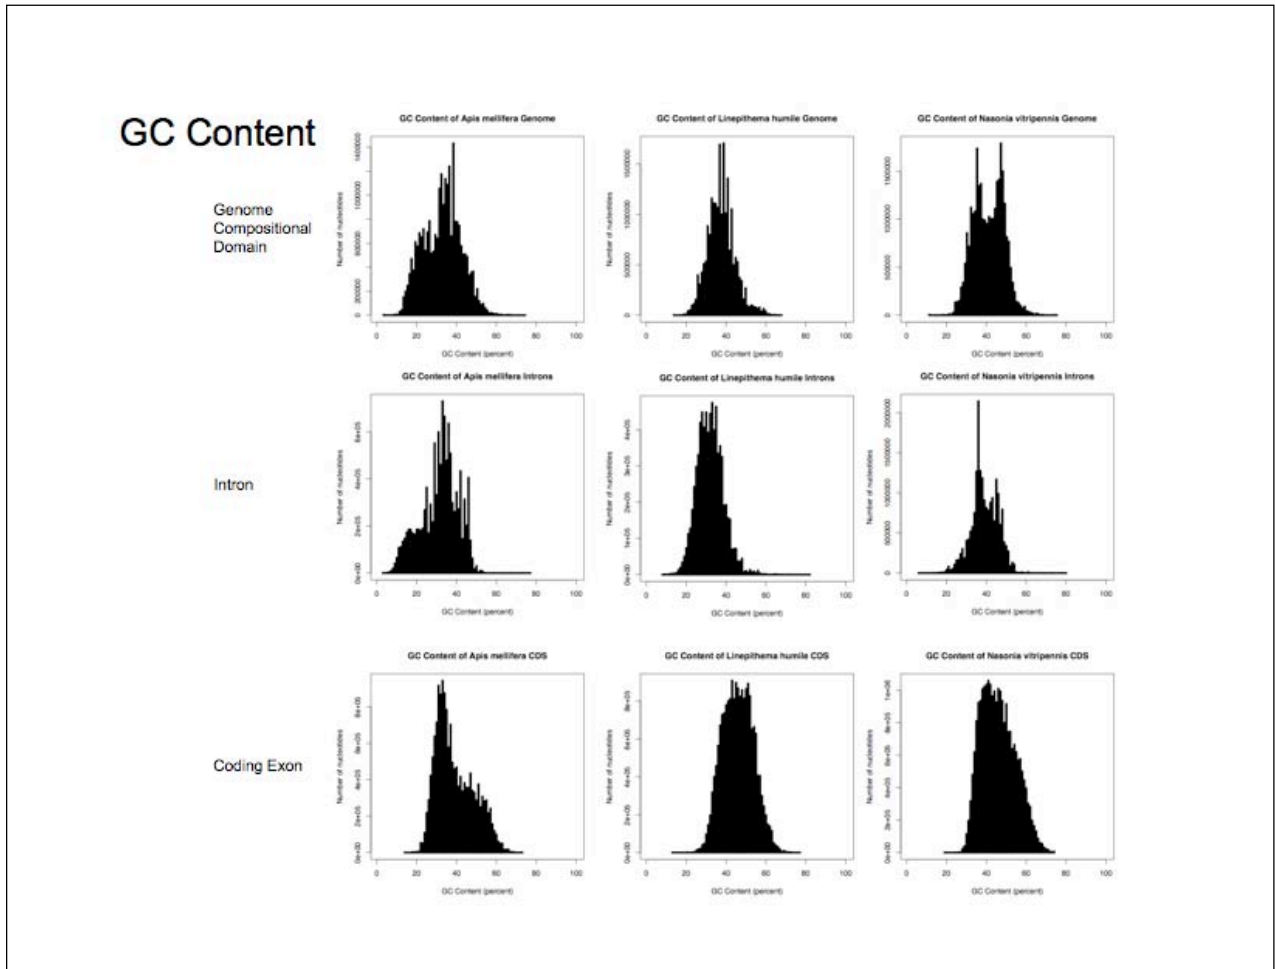

**Figure S10.** Distribution of CpG(O/E) in compositional domains, introns and coding exons of *A. mellifera*, *L. humile* and *N. vitripennis*.

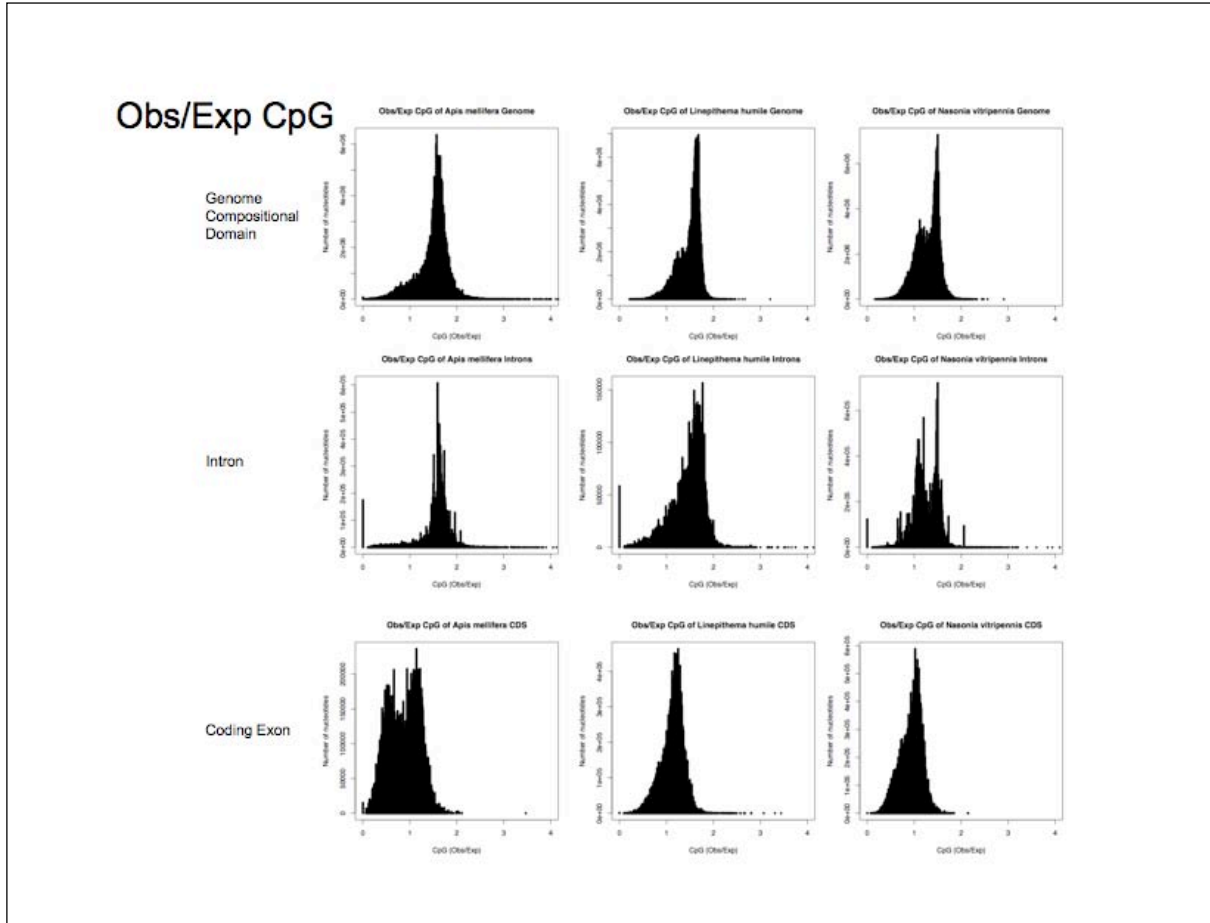



## MicroRNAs

To identify miRNAs within the genome of *L. humile* we employed two strategies. The first strategy used previously identified miRNAs to identify conserved homologs in the ant. To do this, we queried the *L. humile* genome with known miRNAs from miRBase release 14.0 (65-67) using BLASTN with a word size of 7 and an e-value threshold  $\leq 0.001$ . This query yielded 81 sequences with some degree of sequence similarity to conserved miRNAs from other species. *L. humile* sequence was extracted and included approximately 15 nucleotides of flanking sequence. To assess homology, PRSS (68) was used with 1000 shuffles. This step eliminated several sequences with similarity to murine and plant miRNAs. This is not surprising as these miRNAs are composed of simple sequences. Nucleotide sequence alignments were performed using ClustalW (69), aligning the putative miRNA sequence with known miRNAs from the genome sequences of *A. mellifera*, *N. vitripennis*, and *D. melanogaster*. The putative *L. humile* miRNAs were trimmed to retain the most likely pre-miRNA sequence. RNAfold (70) was finally used to score the folding energy (minimum 20 Kcal/mol) and assess the structure of the pre-miRNA candidates. Our analysis resulted in the identification of 71 conserved *L. humile* miRNAs.

The second strategy for miRNA identification uses three-way genome comparison between *L. humile*, *A. mellifera*, and *N. vitripennis*, for the identification of micro-conserved sequence elements (MCEs). MCEs are typically 20–29 nt in length and have previously been exploited to identify miRNAs (71, 72). The identification of three-way genome intersections results in hundreds of thousands of MCEs across a rather large evolutionary distance (approximately 190 million years). MCEs representing simple sequence repeats were excluded and the remaining sequences were clustered to reduce

redundancy before being mapped back to the genome. Approximately 75 nucleotides of sequence flanking the MCEs were extracted. We mapped the extended *L. humile* sequences to the *N. vitripennis* and *A. mellifera* genomes and retained only those sequences with identifiable homology. With approximately 10,000 sequences remaining in our study, we expect to identify additional miRNA candidates by scoring, and folding the extended sequences, similar to the methods described above.

### **RNAi**

RNA interference (RNAi) is a double-stranded RNA (dsRNA)-mediated gene silencing mechanism through target mRNA cleavage and/or translational repression (41). We annotated 30 genes in the *L. humile* genome that are associated with the RNAi pathway, including all the genes potentially involved in biogenesis and biological function of miRNAs, siRNAs and piRNAs (Table S2, Fig. S16). Interestingly, all of these genes appear as single copies except *loquacious (loqs)*, which is duplicated in the *L. humile* genome. Domain analysis by InterProScan shows that *L. humile* Loquacious 1 and 2 have three and two double stranded RNA binding domains (RBD), respectively. The dsRBD3 of *L. humile* Loquacious is noncanonical (Fig. S16B), consistent with its homolog in *D. melanogaster* (42, 43).

A)

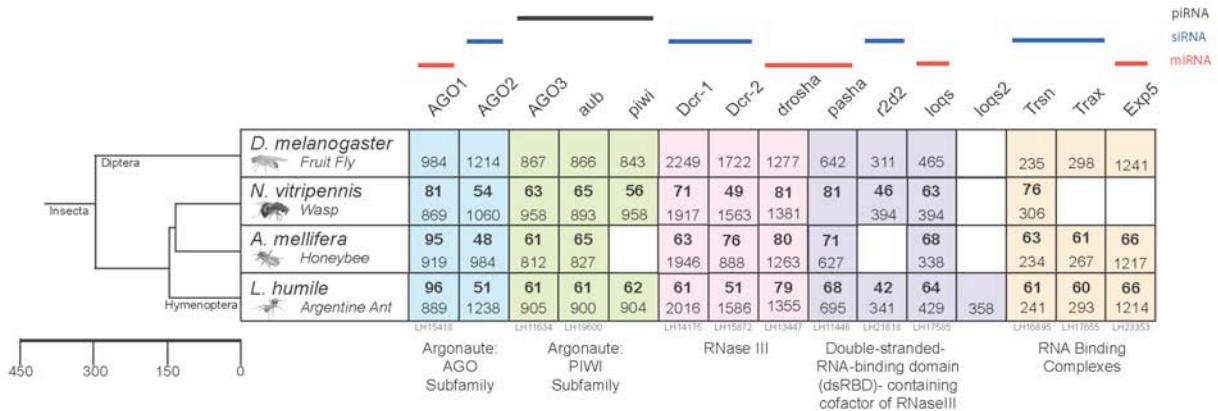

B)

```

Xlrba-2      NPVGSLOELAVQKGWRL--PEYTVAQESGPPHK-REFTITCRVE-----TFVETGSGTSKQVAKRVAAEKLLTKFKT
Lhum_Loq1_RBD1 TPVSVLQELLSRRGTI---PKYELVQIEGAIHE-PTFRYRVTVADVVEADPIVSAMGTRSKKEAKHAAAKAVLDKLG
Lhum_Loq1_RBD2 NPIGALQEMCMSRHWP--PKYTMGEEGLPHE-RQFTIVCTIL-----KYREIGQKSKKVAKRHAAHKMWQALHD
Lhum_Loq1_RBD3 NLVQFLQEIASEQQFE---VTYVDIEEKSISGKFQCLVQLSTL-----PVAVCYGCGVTSKDAQASAAQNALEYLKI
Lhum_Loq2_RBD1 -PISFLQEFAIKQGYV---PMY-DFKIMNPN-----G-----NNLSTDGTGNSKKEAKQKAAENMLLLLGG
Lhum_Loq2_RBD2 NYIGVLQELCVRQKLSPRDISYKVIGESGPSHM-RCFIIEVSVK-----SLRAHGTAQSKKIAKQEAAKNLLHDLGL
  
```

**Figure S16.** RNAi genes. **A)** Reference *D. melanogaster* genes for RNA interference pathways were used to manually annotate *L. humile* genes. The percent protein similarity (bold numbers) and length of annotated orthologs (unbolded numbers) are shown for each gene. Genes are classified according to the functional subfamily which they shared similarity to and whether they function primarily in piRNA (black lines), siRNA (blue lines), and miRNA (red lines) pathways. Empty boxes indicate instances where no clear ortholog was found. **B)** Comparison between *L. humile loquacious* double stranded RNA binding domain (RBD) and the second RBD of *Xlrba* (*Xlrba-2*). Three regions important for binding dsRNA (23) are highlighted. Regions 1 (red) and 2 (blue) are associated with the interaction between the secondary structures of protein and the dsRNA minor groove, and Region 3 (pink) is involved in the interaction of the C-terminal secondary structure and the dsRNA major groove (23). The invariable histidine (H), which is specifically responsible for recognizing the minor groove, is missing in Region 2 of *Lhum\_Loq1\_RBD3* and *Lhum\_Loq2\_RBD1* suggesting that these two RBDs are noncanonical.

### **Wing and reproductive system development**

Wing polyphenism and reproductive division of labor between queens and workers are two major and universal features of eusociality in ants (73). Both of these features evolved approximately 150 million years ago (74, 75), and have been key to their amazing evolutionary success – wing polyphenism was key for allowing ants to colonize the ground, while reproductive division of labor was key for their organization into eusocial colonies (73). The gene networks that underlie wing polyphenism and reproductive system development are generally conserved between ants and *D. melanogaster* (76, 77). In ants, however, these networks have evolved to be differentially expressed between winged reproductive castes and wingless sterile worker castes in response to either environmental or genetic factors (76, 77). In response to these factors, these networks must simultaneously produce fully functional wings and reproductive organs in the queen and male castes, but interrupt the expression of specific genes in the network to halt the development of wings and constrain reproduction in worker castes. While some candidate genes that are differentially expressed between queens and workers have been cloned and identified (76, 77), our ability to understand the evolutionary and developmental dynamics of these genes both within and between species has been limited by the absence of an ant genome.

The unicolonial colony structure of introduced *L. humile* populations may have been facilitated by changes in wing polyphenism and reproductive division of labor. The multiple queens of *L. humile* colonies still produce wings, but these queens do not fly, and existing colonies grow primarily through colony budding (78). Workers, which still possess reproductive organs, are functionally sterile (79).

We followed the method of Elango et al. (80) to assess whether or not the genes we annotated show signatures of putative methylation relative to the rest of the *L. humile* genome. For each annotated gene, we calculated the frequency of the observed number of CG dinucleotides for the coding region (exons and introns), as well as promoter regions (approximately 5kb upstream of the start codon) using a custom Perl script. For both regions of each gene, we calculated the mean CpG(O/E) values for three sets of genes: genes underlying wing polyphenism, genes involved in reproductive system development, and genes known to control apoptosis. We included genes that

control apoptosis in our analysis because they are intimately linked to the networks that control wing development (81, 82) and oogenesis (83).

**Figure S11.** CpG(OE) for wing development, reproduction, and apoptosis genes in A) *L. humile* and B) *D. melanogaster*. The observed mean for genes in the networks underlying wing polyphenism (red line), reproductive division of labour (green line), and apoptosis (blue line) are plotted relative to the distribution of CpG(O/E) values for all genes in the genome.

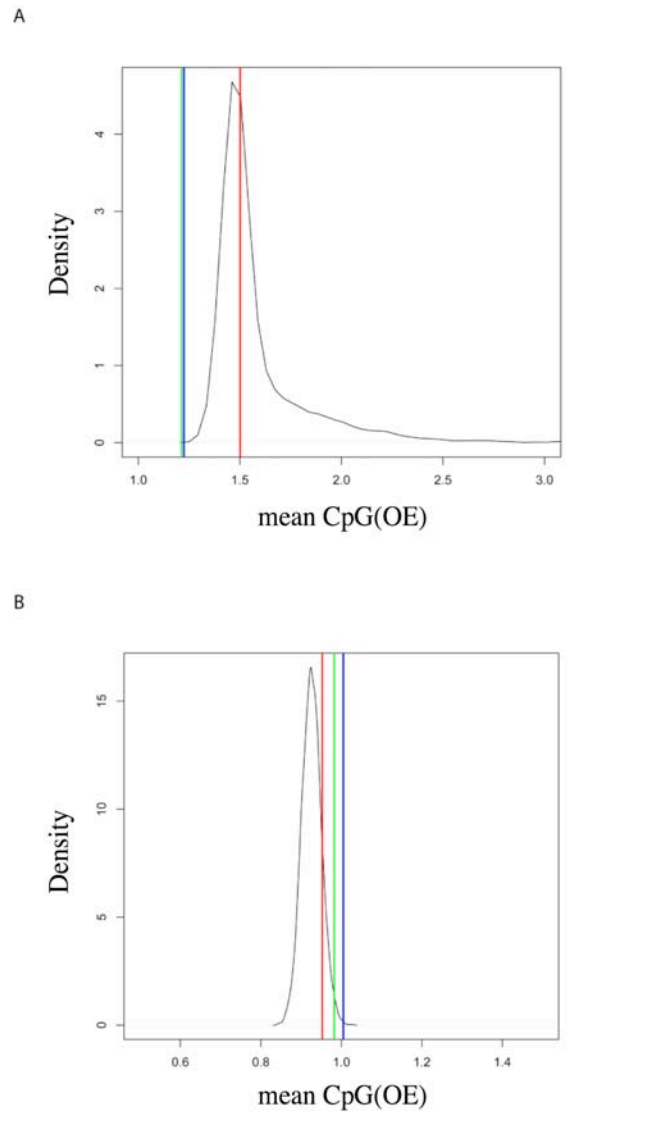

To compare the mean CpG(O/E) values for these three sets of genes (coding and promoter regions) to a genome-wide mean CpG(O/E), we segmented the scaffolds from the draft assembly of the *L. humile* genome into 1kb, non-overlapping, fragments using custom Perl scripts. We measured the frequency of CG dinucleotides and calculated the CpG(O/E) values for each 1kb fragment using custom Perl scripts based on the same equation as above. We then calculated a genome-wide mean CpG(O/E) by taking the mean CpG(O/E) of all 1kb fragments. Although there are alternative methods for generating a genome-wide mean CpG(O/E), we used this specific method because it was the only way we could perform the equivalent analyses in and compare them to *Drosophila*, an insect species which lacks a CpG methylation system.

To test whether or not there are any significant differences in the mean CpG(O/E) values between the three sets of genes that we annotated and the genome-wide mean CpG(O/E), we performed a statistical randomization procedure as follows: first, we generated a random distribution of CpG(O/E) values by randomly selecting 50 CpG(O/E) values from the genome-wide distribution. We selected 50 because this is approximately the same number of genes as that contained within each of the three sets of genes we manually annotated. We then calculated the mean CpG(O/E) for this random distribution. Second, we repeated this first step 10,000 times, and then plotted all 10,000 randomly generated mean CpG(O/E) values (x-axis representing the mean CpG(O/E) values and y-axis representing the frequency). Third, we determined where the observed mean CpG(O/E) for each of the three sets of genes we annotated fell with respect to the randomly generated mean CpG(O/E) values. If it fell within the top or bottom 5% of the distribution of randomly generated mean CpG(O/E) values, then the observed mean

CpG(O/E) values were significantly different than the genome-wide mean CpG(O/E). We performed the same statistical analyses in *Drosophila* using *Drosophila* orthologs of the genes we annotated in *L. humile* (Figs. 2, S11).

We discovered that the mean CpG(O/E) for genes (coding regions) in the network underlying reproductive division of labor (n=38; Mean = 1.21;  $p < 0.00$ ) and apoptosis (n=18; Mean = 1.22;  $p < 0.00$ ) are significantly less (Figure S11) than the genome-wide mean CpG(O/E) (Mean = 1.63). The genes (coding regions) in the network underlying wing polyphenism is not (Figure S11) significantly different than the genome-wide mean CpG(O/E) (n=37; Mean = 1.50;  $p = 0.4865$ ). The mean CpG(O/E) of the *Drosophila* orthologs (coding regions) that underlie wing development (Mean = 0.95;  $p = 0.86$ ), reproduction (Mean = 0.98;  $p = 0.98$ ), and apoptosis (Mean = 1.00;  $p = 0.99$ ) are not significantly different (Figure S11) than the genome-wide mean CpG(O/E). Together, these results indicate that developmental genes in the network underlying reproductive division of labor and apoptosis have a distinct methylation signature relative to the rest of the *L. humile* genome, while genes in the network underlying wing polyphenism in ants.

According to Elango et al. (80), genes that are methylated in the germline should exhibit a mean CpG(O/E) that is under 1.0. The fact that mean CpG(O/E) values of the three sets of developmental genes are greater than 1.0, but significantly less than the genome-wide mean CpG(O/E), may indicate that they are still methylated but have a different methylation signature than the rest of the genes in the genome. The high level of significance for genes underlying reproductive system development and apoptosis may be due to their markedly different regulation between the two castes. This differential regulation may be due to the fact that many of the genes underlying reproductive division

of labor are these genes are germline specific, and because apoptosis is a major mechanism to differentiate castes during development. The majority of genes in the network underlying wing polyphenism are not specific to wing development, and many of them are used so broadly, and in so many different structures, that they maybe require a different methylation signature. Although these intriguing results await empirical validation, they open many avenues for future research.

### **Chemoreception (Grs, OBPs, Ors, Irs)**

Gustatory receptors (Grs). The ant chemosensory gene families were manually annotated (OBPs, Grs, and Ors), essentially as described earlier (84). One difficulty was that a few genes had single apparent frameshifts, but upon examination of the raw reads from both 454 and Illumina contributing to these regions, it was apparent that these might be persistent 454 homopolymer sequencing errors because not all reads contained the same number of homopolymer bases as the assembly, and they were accordingly fixed. Several more gene models had gaps in the assembly, and we also attempted to repair these using raw reads to extend into the gap. Missing parts of these genes were sometimes found amongst a small number of unassembled contigs, in which case the most appropriate contig was joined to the gene model to complete it. Supplementary Table S10 provides details of the GR family genes and encoded proteins, and the encoded proteins are provided in FASTA format as a supplementary file. Only three genes were already perfectly built, another 20 existing automated gene models correspond to some of these genes, but with many changes required, including fusions and splits of models. Twenty of the 116 LhGr models are pseudogenes (compared to 50-60 Gr pseudogenes in *Apis*, and 11 in *Nasonia*), and 14 required repair of the genome assembly, so these could not have



been automatically annotated perfectly anyway. The remainder are all new gene models. We attempted to name these genes in a concordant way with the existing AmGr and NvGr names, but this is difficult because of gene losses and duplications in different lineages. For example, the two candidate sugar receptors, Gr1 and 2, were apparently duplicated as a block, and then one duplicate in each block degenerated to a pseudogene. To preserve the gene numbering for the remainder of the “orthologous” Grs, we named these LhGr1.1, 1.2, and 2.1 and 2.2 (LhGr1.3 is yet another pseudogene duplicate). Similarly, LhGr9 was duplicated, yielding a new pseudogene, hence the names 9.1 and 9.2. Finally, no gene was given the LhGr5 name.

We constructed a corrected distance tree depicting the relationship among the hymenopteran Grs as in Robertson et al. (84). The two candidate sugar receptor lineages were defined as the outgroup to root the tree, based on the highly divergent sequence and gene structure of this gene subfamily (85, 86). The *Nasonia*, *Apis*, and *Linepithema* gene/protein names are highlighted in blue, amber, and green, respectively, as are the branches leading to them to emphasize gene lineages. Numbers above branches are percentage support from 10000 bootstrap replications of uncorrected distance analysis. Double thickness branches indicate inferred independent GR lineages. Comments on each gene lineage are on the right. Suffixes after the gene/protein names are: PSE – pseudogene; CTE – C-terminus missing; INT – internal sequence missing; FIX – sequence fixed with raw reads; JOIN – gene model joined across scaffolds (combined suffixes are abbreviated).

Odorant binding proteins (OBPs). We identified 12 genes in the *L. humile* genome encoding odorant binding proteins (OBPs), which are short secreted proteins typically containing 6 highly conserved cysteines that form three disulfide bonds (although some have lost two of these cysteines, in this set only LhOBP2 and 3) (e.g. 87). The genes and their encoded proteins are summarized in Table S15. There were at least partial automated gene models for all 12 OBPs. Seven of these were perfect, with others requiring fixes of assembly gaps, correction of frameshifting homopolymers, or addition of missing exons. Only one gene could not be fully built, that for OBP9 is missing the expected N-terminal exon that typically encodes the signal sequence at the start of these secreted proteins, and unfortunately there are no ESTs for it. Like OBPs in other insects, most of these genes are highly expressed enough to have ESTs in whole body EST projects like that undertaken for this ant. These ranged from zero ESTs for two genes, to fewer than 10 for four more, and up to around 113 for OBP4.

There are simple apparent orthologs for a subset of the 21 OBPs known from the honey bee genome, some of which are conserved throughout endopterygote insects (87). These are AmOBPs 1, 5, 6/8, 9, 10, and 11. The apparently orthologous ant OBPs were given the same names. This ant also has a small expansion of OBPs distantly related to AmOBPs 7 and 12, given the numbers 2, 3, 4, 8, 12. There are no obvious ant relatives of the AmOBPs 2, 3, 4 and 7. Finally, this ant has a single OBP7 with a possible relationship to the bee OBP expansion of 13-21. Thus ants and bees share a core set of six conserved OBPs that are probably involved in multiple functions, some not even related to odorant binding, given their expression in other tissues (87). On the other hand, they have differentially expanded different lineages of species-specific OBPs, which are more

likely to be involved in olfaction. One of these is the fire ant *Solenopsis invicta* gp-9 protein, which is an OBP implicated in regulation of queen numbers in colonies (88), however there is no particularly closely related OBP in *L. humile*.

Odorant receptors (Ors). The odorant receptor (Or) family of seven-transmembrane proteins in insects mediates most of insect olfaction (e.g. 89, 90), with additional contributions from a subset of the distantly related gustatory receptor (Gr) family, for example, the carbon dioxide receptors in flies (91-93), and a subset of the recently described and unrelated Ionotropic Receptors (IRs) (94). The Or family ranges in size from a low of 10 genes in the human body louse (95), to 50-100 receptors in *Drosophila* (85, 96), mosquitoes (97, 98), the silk moth *Bombyx mori* (99, 100), and the pea aphid *Acyrtosiphon pisum* (e.g. 101), and from 100-300 in the beetle *Tribolium castaneum* (102), the honey bee (103), and *Nasonia* wasps (84). Although most genes in *Drosophila* are scattered around the genome, with only a few in small tandem arrays, tandem arrays are more typical of the other species, especially those with large repertoires, from which it is inferred that these larger repertoires may result, in part, from the retention of gene duplicates that are generated in these tandem arrays by unequal crossing over.

Ants are expected to have a large Or gene family. Their sensory ecology and social behavior are largely dependent on chemical information, and several species have been shown to have ~400 glomeruli in the antennal lobes of their brains (e.g. 104, 105). Assuming that ants are like flies in usually having one specific Or (plus the obligate heterodimer DmOr83b ortholog) per neuron type, with all neurons that express a particular Or converging on a single glomerulus in the antennal lobe, the so-called “one

receptor - one neuron - one glomerulus” hypothesis, we anticipated approximately 400 Ors. This assumes that an unknown subset of the 116 Grs and the 32 IRs in *L. humile* are also expressed in discrete olfactory sensory neurons that send axons to glomeruli in the antennal lobe.

The Or family was manually annotated using methods previously employed for the *Drosophila*, mosquito, moth, beetle, bee, wasp, aphid, and louse genomes. Briefly, TBLASTN searches were performed using bee, and sometimes wasp, Ors as queries, and gene models were manually assembled in the text editor of PAUP\*v4.0b10 (106), using the gene structures of the bee and wasp relatives to inform the ant genes. Iterative searches were also conducted with each new ant protein as query until no new genes were identified in each major subfamily or lineage. Occasionally the gene structures of ant genes were useful in informing improved gene models for some bee genes, specifically the 9-exon subfamily which is highly expanded in ants and wasps. The bee relatives are scattered throughout the AmOr naming system, because their relationship was not properly understood when they were annotated. A short exon was missed from several of them, specifically AmOr122-139. In addition, recognition of the conserved 9-exon structure of these genes allowed refinement of the AmOr172-174 genes, which were only recognized in light of the NvOr genes, but could not be completely built at that time (84). In addition, AmOr175-177 were newly built in this large subfamily, and there are additional fragments of related genes in the poorly assembled AT-rich regions of the bee genome that might represent additional genes. All of the LhOr genes and encoded proteins are detailed in Table S11. LhOr and AmOr proteins are available as FASTA format text files.

The *L. humile* genome assembly suffers from an unusual minor problem of bases in the assembly that are not in any of the raw reads, causing frameshifts when they occur in exons. These are not obviously caused by homopolymer length errors in the 454 reads, and their origin is unclear. Therefore each instance of a simple single-base frameshift was checked in both the 454 and ILLUMINA raw reads. In these cases the assembled sequence was fixed and these problems are noted in Table S11. In addition, as is typical of draft genome assemblies, gaps between contigs often interrupt gene models, especially when very similar genes are found in tandem arrays. These were repaired as best possible using the raw reads and are similarly noted in Table S11. There were several gene fragments resulting from assembly gaps that encode less than half the typical length of an insect Or (200 amino acids), and these were not included in the analysis, although they likely represent intact genes. Pseudogenes were translated as best possible to provide an encoded protein that could be aligned with the intact proteins for phylogenetic analysis, and particular attention was paid to the precise number of pseudogenizing mutations in each pseudogene. Again a 200 amino acid minimum was enforced for including pseudogenes in the analysis. All ant, bee, and wasp Ors were aligned in CLUSTALX v2.0 (69) using default settings, and problematic gene models and pseudogenes were refined in light of these alignments.

For phylogenetic analysis, the poorly aligned and variable length N-terminal and C-terminal regions were excluded (specifically before the conserved GhWP motif in the N-terminus and after the conserved SYFT motif in the C-terminus), as were major internal regions of length differences, especially a long length difference region between the longer DmOr83b orthologs (PbOr1, AmOr2, and NvOr1) and most of the other Ors.

Other regions of potentially uncertain alignment between these highly divergent proteins were retained because, while potentially misleading for relationships of the subfamilies (which are poorly supported), they provide important information for relationships within subfamilies.

Phylogenetic analysis of this large set of 844 proteins is difficult, but was successfully carried out in the same fashion as for previous Or analyses (e.g. 84, 103). This involved a combination of model-based correction of distances between each pair of proteins, and distance-based phylogenetic tree building. Pairwise distances were corrected for multiple changes in the past using the BLOSUM62 amino acid exchange matrix in the maximum likelihood phylogenetic program TREEPUZZLE v5.2 (107). These corrected distances were fed into PAUP\*v4.0b10 where a full heuristic distance search was conducted with tree-bisection-and-reconnection branch swapping to search for the shortest tree. Given the large number of proteins, this search was unlikely to end and was terminated after two days with ~12 million trees examined. The resultant tree is shown in Figure S12. Unfortunately this large number of proteins precludes distance-based bootstrap analysis to assess the confidence of major branches in the tree, but likely orthologs and obvious gene losses and subfamily expansions are noted on the right margin of the tree. Unlike previous large Or trees which were split into multiple page-sized images, it is presented as a single image.

The LhOr gene set herein consists of 367 models. Thirty of these (8.2%) are apparent pseudogenes, 19 frameshifts were corrected, and 20 gene models required repair of assembly gaps. The result is 337 apparently intact Or proteins, although six of these are still missing N-terminal, C-terminal, or internal regions, so their functionality remains

uncertain (excluding the sets of Or60-70 and Or171-203 which have short N-terminal exons that are difficult to recognize with confidence). Less obvious pseudogenes (for example with small in-frame deletions or insertions, crucial amino acids changes, or promoter defects) would not be recognized, so this total might be high. A few gene fragments remain so short and incomplete that they were not included, but some might represent intact genes.

The automated gene modeling process had access to all available AmOrs and NvOrs, as well as other insect Ors in GenBank, for comparative information, and succeeded in building at least partial gene models for 201 of these 367 genes. However, as has been true for most other insect genome projects, just five of these are precisely correct. Most others require multiple changes, while many instances of concatenated gene models were observed (Table S11), resulting in a total of 140 automated models representing these 367 Ors (the most extreme was LH22493, which includes parts of eight genes and spans 20 kb on scaffold 7180001005020). Unfortunately because these genes are typically expressed at very low levels in only a few cells, they are seldom represented by ESTs in the whole body 454-sequencing project, as was employed for this genome, indeed just seven genes had one or two useful ESTs representing them (Table S11), hence there is little experimental support for most gene models. Nevertheless, there is EST support for representatives of most NvOr subfamilies and many AmOr subfamilies (84) so these manually built gene models are of high confidence. This situation again reveals the importance of manual annotation for these rapidly evolving and highly divergent genes. Manual annotation was also obviously essential for detailed analysis of pseudogenes.

As expected, there is a single highly conserved ortholog of the DmOr83b protein, named LhOr1 in hopes of encouraging this convention for this gene and protein in other species. It shares 77% amino acid identity with AmOr2, 76% with NvOr1, and 61% with DmOr83b. Unfortunately this gene region has suffered an assembly problem in v4 (but is intact in v3), and is now split across two scaffolds, but not at the ends of these scaffolds (similar aberrant assembly problems occurred with Or211 and 233). Only two other possible examples of relatively simple orthology across these three hymenopteran genomes were observed, those of LhOr204PSE (which is a severely damaged pseudogene with 10 major problems) with AmOr161 and NvOr296 (and 297PSE), and LhOr2/3, which are clearly orthologous to AmOr1/3 and NvOr2 at the base of a large expansion in both bees and ants which include several complicated relationships as well as the only hymenopteran Or whose ligand is known, AmOr11 perceiving the major queen pheromone 9-ODA in bees (108).

There are many instances of differential gene lineage or subfamily expansions, as previously seen for the bee/wasp comparison (84), including differential expansions in the ant, for example an expansion of 33 ant genes related to AmOr121 (at the top of the Fig. S12). The largest ant gene subfamily expansions, however, have occurred in a subfamily of 9-exon genes in the middle of the tree. This subfamily consists of several discrete lineages in the bee totaling 43 genes, including AmOr98-105, 106-113, 122-139, 140, 159, 162, 172-174, and 175-177. This subfamily is expanded in *Nasonia*, where it consists of 90 genes (NvOr129-217 and 301). This distinctive subfamily consists of 136 genes in the Argentine ant, and is of particular interest as it may include candidates for the cuticular hydrocarbon receptors. The details have only been established for one ant,



*Campanotus japonicus* (105, 109), in which females have a distinctive set of sensilla that house 150-200 neurons, each of which is presumed to express a particular Or, sending their neurons to a distinctive set of 150-200 glomeruli in the antennal lobe. Cuticular hydrocarbons are long non-volatile chemicals of enormous variety (e.g 110) that regulate important behavioral interactions (such as colonymate recognition), and it has not been obvious which receptors are used to perceive them. In *Drosophila melanogaster* two related lineages of gustatory receptors or Grs have been implicated in the perception of female cuticular hydrocarbons by males, but the exact ligand-receptor identification has yet to be made, these are expressed in contact chemosensilla on the male foretarsi, and their neurons send axons to the sub-oesophageal ganglion instead of the antennal lobe (111, 112). As described above, *L. humile* has two expansions of Grs, but neither is large enough to encode such a repertoire of CHC receptors, and at least one is likely to encode receptors for bitter plant defensive chemicals. Therefore, this expansion of 9-exon Or genes appears to be the strongest candidate for containing CHC receptors.

These species-specific expansions have typically occurred in large tandem arrays, some of which are evidently very old because they are shared with bee and even wasp, and commonly the genes within an array are so divergent they barely find each other in TBLASTN searches. For example, LhOr2-46 is a 45-gene tandem array that spans 164 kb on the reverse strand of the 5' end of 170kb scaffold 7180001005020 and continuing on the reverse strand of the 3' end of 254kb scaffold 7180001004633 (Table S11). This feature is related to a 60-gene tandem array in *A. mellifera*, which is described in detail in Robertson and Wanner (103), although the nine related genes in the wasp, *N. vitripennis*, (NvOr2-10) are split across three scaffolds (84). Indeed the first and/or second gene in

this array appears to be orthologous (noted above – LhOr2/3, AmOr1/3, and NvOr2), while the remainder form multiple species-specific gene lineage expansions (Figure S12). LhOr71-116 is another large tandem array of 46 genes spanning 157kb on 1.591Mb scaffold 7180001004912.

Finally, the Or family reveals many instances of apparent gene loss, with some lineages completely absent from one or more of these three hymenopterans. In the absence of bootstrap analysis the numbers of these losses in each species cannot be confidently determined, and the uncertain orthology of several subfamily lineages also makes it difficult to determine the number of losses, but obvious examples are noted in Figure S12. Separate subfamily tree analysis confirms all of these, and adds several more, confirming the dynamic gene family evolution known already from comparisons of other species Or repertoires.

**Figure S12 (separate file). Phylogenetic tree of the hymenopteran Ors.** This is a corrected distance tree generated. The DmOr83b orthologs LhOr1, AmOr2, and NvOr1 were declared as the outgroup to root the tree, based on the basal position of this gene in the Or family in analysis of the entire chemoreceptor superfamily in *Drosophila melanogaster* (85). The *Nasonia*, *Apis*, and *Linepithema* gene/protein names are highlighted in blue, amber, and green, respectively, as are the branches leading to them to emphasize gene lineages. Double thickness branches indicate inferred independent Or lineages. Comments on each gene lineage are on the right. Suffixes after the gene/protein names are: PSE – pseudogene; NTE – N-terminus missing; CTE – C-terminus missing; INT – internal sequence missing; FIX – sequence fixed with raw reads; JOI – gene model joined across scaffolds; multiple suffixes are abbreviated to single letters.

**Table S10. Details of LhGr family genes and proteins.** Columns are: Gene – the gene and protein name we are assigning; OGS – the official gene number; Scaffold# – the V4 genome assembly scaffold ID (preceded by scf18000100 in full name); Coordinates – the nucleotide range from the first position of the start codon to the last position of the stop codon in the scaffold; Strand – + is forward and - is reverse; Introns – number of introns; AAs – number of encoded amino acids in the protein; ESTs – number of ESTs (amongst 532,809 454 reads, \* indicates aberrantly spliced); Comments – comments on the OGS gene model, repairs to the genome assembly, and pseudogene status (numbers in

parentheses are the number of pseudogenizing mutations). Suffixes after the gene/protein names are: PSE – pseudogene; CTE – C-terminus missing; INT – internal sequence missing; FIX – sequence fixed with raw reads; JOIN – gene model joined across scaffolds (combined suffixes are abbreviated).

| Gene     | OGS       | Scaffold# | Coordinates     | Strand | Introns | AAs | ESTs | Comments                      |
|----------|-----------|-----------|-----------------|--------|---------|-----|------|-------------------------------|
| Gr1.1    | LH14807   | 4828      | 74106-108737    | -      | 10      | 459 | -    | Multiple changes              |
| Gr1.2PI  | LH13968   | 4748      | 51542-71539     | +      | 9       | 354 | -    | Pseudogene (2); has gap       |
| Gr1.3PJ  | LH12478   | 4608      | 10048-26232     | -      | 10      | 442 | -    | Pseudogene (1) joined         |
|          |           | 3431      | 1239-1787       | -      |         |     |      | across two scaffolds          |
| Gr2.1PSE | LH14798   | 4828      | 64675-67419     | +      | 5       | 212 | -    | Pseudogene (1)                |
| Gr2.2    | LH14676/5 | 4807      | 6885-24895      | -      | 8       | 473 | 1    | Join gene models              |
| Gr3      | LH19341   | 4967      | 83594-86853     | -      | 8       | 538 | 1*   | Multiple changes              |
| Gr4      | LH11242   | 4450      | 22954-24621     | +      | 3       | 457 | -    | Fine as is                    |
| Gr6      | LH21487   | 5009      | 652146-656146   | +      | 5       | 391 | 1    | Fine as is                    |
| Gr7FIX   | LH19885   | 4974      | 44323-48477     | -      | 6       | 428 | -    | Fix frameshift                |
| Gr8      | LH13821   | 4715      | 6008073-6009590 | -      | 4       | 371 | 1    | Part of large gene model      |
| Gr9.1    | LH13821   | 4715      | 6005287-6006803 | -      | 4       | 364 | -    | Part of large gene model      |
| Gr9.2PSE | LH13821   | 4715      | 6001485-6002981 | -      | 4       | 358 | -    | Part of model; Pseudogene (1) |
| Gr10     | LH19939   | 4979      | 84660-97730     | -      | 5       | 363 | -    | Fine as is                    |
| Gr11     | LH21303   | 5005      | 2838498-2840486 | -      | 2       | 430 | 1    | Second half missing           |
| Gr12     | -         | 5013      | 2768-5020       | -      | 4       | 377 | -    | New gene model                |
| Gr13     | -         | 5018      | 2245014-2246416 | -      | 2       | 414 | -    | New gene model                |
| Gr14     | -         | 5018      | 755164-756641   | +      | 2       | 415 | -    | New gene model                |
| Gr15PSE  | -         | 5018      | 761347-763072   | +      | 2       | 420 | -    | Pseudogene (1)                |
| Gr16     | -         | 5018      | 764333-765842   | +      | 2       | 422 | -    | New gene model                |
| Gr17     | -         | 5018      | 767066-768565   | +      | 2       | 417 | -    | New gene model                |
| Gr18     | -         | 5018      | 769831-771330   | +      | 2       | 422 | -    | New gene model                |
| Gr19     | LH19887   | 4974      | 50648-53593     | -      | 6       | 406 | -    | Multiple changes              |
| Gr20     | LH10133   | 2461      | 100167-102910   | +      | 6       | 408 | -    | Multiple changes              |
| Gr21     | -         | 2461      | 104060-106547   | +      | 6       | 408 | -    | New gene model                |
| Gr22PSE  | -         | 2461      | 107105-108998   | +      | 4       | 320 | -    | Pseudogene (6)                |
| Gr23     | -         | 2461      | 109340-111809   | +      | 6       | 409 | -    | New gene model                |
| Gr24PSE  | -         | 2461      | 112327-114201   | +      | 4       | 314 | -    | Pseudogene (13)               |
| Gr25     | -         | 2461      | 115110-117567   | +      | 6       | 408 | -    | New gene model                |
| Gr26     | -         | 2461      | 118086-120716   | +      | 6       | 407 | -    | New gene model                |
| Gr27     | LH10136   | 2461      | 121216-124072   | +      | 6       | 411 | -    | First 1/2 of gene model       |
| Gr28PSE  | LH10136   | 2461      | 124705-126863   | +      | 6       | 397 | -    | Second 1/2; Pseudogene (1)    |
| Gr29FIX  | -         | 2461      | 127508-128817   | +      | 6       | 396 | -    | Fix assembly gap              |
| Gr30     | -         | 2461      | 129677-132618   | +      | 6       | 384 | -    | New gene model                |
| Gr31     | -         | 2461      | 133514-135509   | +      | 6       | 396 | -    | New gene model                |
| Gr32FIX  | -         | 2461      | 136377-138246   | +      | 6       | 393 | -    | Fix assembly gap              |

|         |         |      |                |   |   |     |   |                          |
|---------|---------|------|----------------|---|---|-----|---|--------------------------|
| Gr33    | LH10134 | 2461 | 139146-141321  | + | 6 | 402 | - | Multiple changes         |
| Gr34    | -       | 2461 | 142088-144495  | + | 6 | 393 | - | New gene model           |
| Gr35FIX | -       | 2461 | 146592-149078  | + | 6 | 396 | - | Fix frameshift           |
| Gr36    | -       | 2461 | 150692-153515  | + | 6 | 392 | - | New gene model           |
| Gr37    | -       | 2461 | 154369-156965  | + | 6 | 397 | - | New gene model           |
| Gr38    | -       | 2461 | 157687-159966  | + | 6 | 386 | - | New gene model           |
| Gr39    | -       | 2461 | 161247-163572  | + | 6 | 377 | - | New gene model           |
| Gr40PF  | -       | 2461 | 164888->165553 | + | 6 | 411 | - | Fix gap; pseudogene (1)  |
| Gr41CTE | -       | 2461 | 168688->170350 | + | 6 | 325 | - | C-terminus missing       |
| Gr42    | LH22029 | 5018 | 516-3147       | + | 6 | 382 | - | Part of large gene model |
| Gr43    | -       | 5018 | 4344-6901      | + | 6 | 392 | - | New gene model           |
| Gr44    | LH22029 | 5018 | 7935-10872     | + | 6 | 395 | - | Part of large gene model |
| Gr45    | LH22029 | 5018 | 11233-13986    | + | 6 | 398 | - | Part of large gene model |
| Gr46    | LH22029 | 5018 | 14738-18673    | + | 6 | 397 | - | Part of large gene model |
| Gr47    | -       | 5018 | 19034-21774    | + | 6 | 397 | - | New gene model           |
| Gr48PSE | LH22028 | 5018 | 22532-24684    | + | 6 | 356 | - | Pseudogene (7)           |
| Gr49    | -       | 5018 | 26012-28169    | + | 6 | 396 | - | New gene model           |
| Gr50    | -       | 5018 | 28859-31033    | + | 6 | 396 | - | New gene model           |
| Gr51FIX | -       | 5018 | 32493-34590    | + | 6 | 396 | - | Fix assembly gap         |
| Gr52PSE | -       | 5018 | 35969-38870    | + | 6 | 383 | - | Pseudogene (2)           |
| Gr53    | -       | 5018 | 39572-42186    | + | 6 | 389 | - | New gene model           |
| Gr54    | -       | 5018 | 42654-44687    | + | 6 | 388 | - | New gene model           |
| Gr55    | -       | 5018 | 45414-48282    | + | 6 | 391 | - | New gene model           |
| Gr56    | -       | 5018 | 50233-52120    | + | 6 | 397 | - | New gene model           |
| Gr57    | -       | 5018 | 52978-55148    | + | 6 | 397 | - | New gene model           |
| Gr58    | -       | 5018 | 55788-57965    | + | 6 | 389 | - | New gene model           |
| Gr59PSE | -       | 5018 | 58989-61164    | + | 6 | 397 | - | Pseudogene (2)           |
| Gr60FP  | -       | 5018 | <61480-63340   | + | 6 | 434 | - | Fix gap; pseudogene (5)  |
| Gr61    | -       | 5018 | 64118-66290    | + | 6 | 395 | - | New gene model           |
| Gr62    | -       | 5018 | 66742-68931    | + | 6 | 395 | - | New gene model           |
| Gr63PSE | -       | 5018 | 69895-72074    | + | 6 | 389 | - | Pseudogene (6)           |
| Gr64    | -       | 5018 | 74382-76560    | + | 6 | 395 | - | New gene model           |
| Gr65    | -       | 5018 | 77020-79207    | + | 6 | 394 | - | New gene model           |
| Gr66    | -       | 5018 | 79693-81862    | + | 6 | 390 | - | New gene model           |
| Gr67FIX | -       | 5018 | 84168-86845    | + | 6 | 394 | - | Fix assembly gap         |
| Gr68PSE | -       | 5018 | 87331-89514    | + | 6 | 389 | - | Pseudogene (2)           |
| Gr69FP  | -       | 5018 | 90544->93088   | + | 6 | 388 | - | Fix gap; pseudogene (3)  |
| Gr70FIX | -       | 5018 | <94170-96200   | + | 6 | 390 | - | Fix assembly gaps        |
| Gr71    | -       | 5018 | 98532-101533   | + | 6 | 393 | - | New gene model           |
| Gr72    | -       | 5018 | 102616-106230  | + | 6 | 389 | - | New gene model           |
| Gr73    | -       | 5018 | 106853-109006  | + | 6 | 394 | - | New gene model           |

|          |         |      |                 |   |   |     |   |                               |
|----------|---------|------|-----------------|---|---|-----|---|-------------------------------|
| Gr74CTE  | -       | 5018 | 109888->112823  | + | 6 | 397 | - | Fix assembly gap              |
| Gr75     | -       | 5018 | 113372-116116   | + | 6 | 391 | - | New gene model                |
| Gr76PSE  | -       | 5018 | 116614-119360   | + | 6 | 392 | - | Pseudogene (1)                |
| Gr77     | -       | 5018 | 119767-122613   | + | 6 | 398 | - | New gene model                |
| Gr78     | -       | 5018 | 122998-125880   | + | 6 | 391 | - | New gene model                |
| Gr79     | -       | 5018 | 126377-129200   | + | 6 | 395 | - | New gene model                |
| Gr80     | -       | 5018 | 129654-132607   | + | 6 | 395 | - | New gene model                |
| Gr81     | -       | 5018 | 133063-135916   | + | 6 | 392 | - | New gene model                |
| Gr82     | -       | 5018 | 137000-139100   | + | 6 | 403 | - | New gene model                |
| Gr83     | -       | 5018 | 139865-141999   | + | 6 | 389 | - | New gene model                |
| Gr84     | -       | 4985 | 1994747-1997275 | + | 6 | 396 | - | New gene model                |
| Gr85     | -       | 4985 | 1998234-2000866 | + | 6 | 392 | - | New gene model                |
| Gr86     | -       | 4985 | 2002272-2004901 | + | 6 | 392 | - | New gene model                |
| Gr87     | -       | 4985 | 2005927-2008474 | + | 6 | 391 | - | New gene model                |
| Gr88     | -       | 4985 | 2009559-2012080 | + | 6 | 396 | - | New gene model                |
| Gr89PSE  | -       | 4985 | 2013204-2015808 | + | 6 | 396 | - | Pseudogene (5)                |
| Gr90     | -       | 4985 | 2016791-2019367 | + | 6 | 394 | - | New gene model                |
| Gr91     | -       | 4985 | 2021453-2024016 | + | 6 | 398 | - | New gene model                |
| Gr92     | LH20185 | 4985 | 2025125-2027700 | + | 6 | 402 | - | Multiple changes              |
| Gr93     | -       | 4985 | 2030013-2032601 | + | 6 | 402 | - | New gene model                |
| Gr94     | LH20184 | 4985 | 2033094-2035730 | + | 6 | 420 | - | First part of model           |
| Gr95     | LH20184 | 4985 | 2036168-2039332 | + | 6 | 402 | - | Second part of model          |
| Gr96     | LH20186 | 4985 | 2039837-2042487 | + | 6 | 398 | - | First part of model           |
| Gr97     | LH20186 | 4985 | 2043004-2045399 | + | 6 | 394 | - | Second part of model          |
| Gr98     | -       | 4985 | 2046134-2048806 | + | 6 | 403 | - | New gene model                |
| Gr99     | -       | 4985 | 2049957-2052760 | + | 6 | 405 | - | New gene model                |
| Gr100    | -       | 4985 | 2053920-2057216 | + | 6 | 406 | - | New gene model                |
| Gr101PSE | -       | 4985 | 2058443-2061142 | + | 6 | 405 | - | Pseudogene (1)                |
| Gr102    | -       | 4985 | 2062677-2065778 | + | 6 | 402 | - | New gene model                |
| Gr103FIX | -       | 4985 | 2067579-2070567 | + | 6 | 400 | - | Fix frameshift and stop codon |
| Gr104    | -       | 4985 | 2071876-2075542 | + | 6 | 403 | - | New gene model                |
| Gr105FIX | -       | 4985 | 2076825-2079996 | + | 6 | 394 | - | Fix assembly gap              |
| Gr106FIX | -       | 4985 | 2081509-2084186 | + | 6 | 398 | - | Fix assembly gap              |
| Gr107    | -       | 4985 | 2085098-2087820 | + | 6 | 397 | - | New gene model                |
| Gr108INT | -       | 4985 | 2091454-2094263 | + | 6 | 399 | - | Fix assembly gap              |
| Gr109    | -       | 4985 | 2095436-2098097 | + | 6 | 396 | - | New gene model                |
| Gr110FIX | -       | 4985 | 2099310-2101152 | + | 6 | 398 | - | Fix assembly gap              |
| Gr111    | -       | 4940 | 1732466-1735058 | + | 6 | 394 | - | New gene model                |
| Gr112PSE | -       | 4940 | 1735556-1738101 | + | 6 | 400 | - | Pseudogene (1)                |
| Gr113    | LH18148 | 4940 | 1739673-1742228 | + | 6 | 391 | - | Multiple changes              |
| Gr114    | -       | 3999 | 23409-25655     | + | 6 | 397 | - | New gene model                |

**Table S15. Details of LhOBP family genes and proteins.** Columns are: Gene – the gene and protein name we are assigning (suffixes are: NTE – N-terminus missing; FIX – assembly was repaired) ; OGS – the official gene number in the 16,177 proteins in OGS1.1; Scaffold – the V4 genome assembly scaffold ID (preceded by scf18000100 in full name); Coordinates – the nucleotide range from the first position of the start codon to the last position of the stop codon in the scaffold; Strand – + is forward and - is reverse; Introns – number of introns; AAs – number of encoded amino acids in the protein; ESTs – number of ESTs (amongst 532,809 454 reads); Isotig – isotig number in EST assembly; Comments – comments on the OGS gene model and repairs to the genome assembly.

| Gene     | OGS     | Scaffold | Coordinate | Strand | Introns | AAs | ESTs | Isotig | Comments           |
|----------|---------|----------|------------|--------|---------|-----|------|--------|--------------------|
| OBP1     | LH21629 | 5010     | 285632-287 | +      | 5       | 139 | 25   | 04013  | Needs C-terminus   |
| OBP2FIX  | LH12959 | 4659     | 219626-222 | -      | 4       | 156 | 13   | 03709  | Fix frameshift     |
| OBP3     | LH12963 | 4659     | 214403-218 | -      | 4       | 155 | 0    | -      | Fine as is         |
| OBP4     | LH12958 | 4659     | 211309-213 | -      | 4       | 149 | 113  | 03012  | Fine as is         |
| OBP5     | LH12960 | 4659     | 233686-235 | -      | 4       | 144 | 8    | 01909  | Fine as is         |
| OBP6     | LH12962 | 4659     | 229707-231 | -      | 5       | 146 | 4    | -      | Fine as is         |
| OBP7     | LH23112 | 5043     | 21919-2327 | +      | 4       | 133 | 33   | 03397  | Fine as is         |
| OBP8     | LH12961 | 4659     | 205438-207 | -      | 4       | 156 | 3    | -      | Fine as is         |
| OBP9NTE  | LH16671 | 4922     | 26398-2721 | -      | 3       | 120 | 0    | -      | N-terminus missing |
| OBP10    | LH15020 | 4838     | 1117240-11 | +      | 5       | 146 | 27   | 03482  | Fine as is         |
| OBP11FIX | LH15023 | 4838     | 1120846-11 | +      | 5       | 146 | 4    | -      | Fix assembly gap   |
| OBP12    | LH19059 | 4958     | 850368-851 | -      | 5       | 173 | 15   | 03490  | Needs N-terminus   |

**Table S11. Details of LhOr family genes and proteins.** Columns are: Gene – the gene and protein name we are assigning (suffixes are: PSE – pseudogene; NTE – N-terminus missing; CTE – C-terminus missing; INT – internal region missing; FIX – assembly was repaired; JOIN – gene model spans scaffolds; multiple suffixes are abbreviated) ; OGS – the official gene number in the 16,177 proteins in OGS1.1; Scaffold – the V4 genome assembly scaffold ID (preceded by scf718000100 in full name); Coordinates – the nucleotide range from the first position of the start codon to the last position of the stop codon in the scaffold; Strand – + is forward and - is reverse; Introns – number of introns; AAs – number of encoded amino acids in the protein; ESTs – number of ESTs (amongst 532,810 Roche/454 reads); Comments – comments on the OGS gene model, repairs to the genome assembly, and pseudogene status (numbers in parentheses are the number of pseudogenizing mutations). Superscript <sup>a</sup> – this gene lost one intron and gained another relative to the other 46 genes in this subfamily. Superscript <sup>b</sup> – these two genes have an additional intron shared with orthologous genes in *Nasonia* and *Apis*. Note that Or60-70 and Or171-203 have short first exons that cannot be confidently identified in the absence of EST evidence, therefore they are all NTE, and coordinates start from the start of the first codon after a phase 1 intron (and this intron is included in the intron count even though it is not in the range coordinates of the CDS).

| Gene  | OGS     | Scaffold | Coordinates   | Stran | Intro          | AAs | ESTs | Comments                  |
|-------|---------|----------|---------------|-------|----------------|-----|------|---------------------------|
| Or1JF | LH19204 | 4964     | 533215-536431 | -     | 7              | 480 | -    | Join across two scaffolds |
|       | LH11309 | 4453     | 170456-172130 | -     |                |     |      | fix frameshift            |
| Or2   | LH25976 | 5020     | 110477-112233 | -     | 4              | 405 | -    | Part of long model        |
| Or3   | LH25976 | 5020     | 107251-109112 | -     | 4              | 406 | -    | Part of long model        |
| Or4   | LH25976 | 5020     | 103453-105313 | -     | 4 <sup>a</sup> | 404 | -    | Part of long model        |
| Or5   | -       | 5020     | 100481-102698 | -     | 4              | 397 | -    | New gene model            |
| Or6   | -       | 5020     | 98184-99899   | -     | 4              | 409 | -    | New gene model            |
| Or7   | LH22493 | 5020     | 91596-93866   | -     | 4              | 400 | -    | Part of long model        |

|         |         |      |               |   |                |     |   |                      |
|---------|---------|------|---------------|---|----------------|-----|---|----------------------|
| Or8     | LH22493 | 5020 | 87345-89634   | - | 4              | 396 | - | Part of long model   |
| Or9     | LH22493 | 5020 | 82824-86499   | - | 4              | 399 | - | Part of long model   |
| Or10    | LH22493 | 5020 | 79304-81300   | - | 4              | 399 | - | Part of long model   |
| Or11    | LH22493 | 5020 | 76185-77967   | - | 4              | 399 | - | Part of long model   |
| Or12    | LH22493 | 5020 | 72178-73850   | - | 4              | 409 | - | Part of long model   |
| Or13    | LH22493 | 5020 | 68896-71197   | - | 4              | 399 | - | Part of long model   |
| Or14FIX | LH22493 | 5020 | 65770->67903  | - | 4              | 400 | - | Fix assembly gap     |
| Or15    | LH25980 | 5020 | 62073-65077   | - | 4              | 400 | - | First half of model  |
| Or16    | LH25980 | 5020 | 59604-61360   | - | 4              | 399 | - | Second half of model |
| Or17    | -       | 5020 | 57484-59072   | - | 4              | 400 | - | New gene model       |
| Or18    | -       | 5020 | 51309-53188   | - | 4              | 409 | - | New gene model       |
| Or19    | LH22492 | 5020 | 47177-49471   | - | 4              | 408 | - | Multiple changes     |
| Or20    | -       | 5020 | 43752-45471   | - | 4              | 407 | - | New gene model       |
| Or21    | -       | 5020 | 39525-41775   | - | 4              | 415 | - | New gene model       |
| Or22PSE | -       | 5020 | 34590-35808   | - | 2              | 301 | - | Pseudogene (3)       |
| Or23    | -       | 5020 | 32093-33886   | - | 4              | 406 | - | New gene model       |
| Or24PSE | -       | 5020 | 30072-31435   | - | 2              | 281 | - | Pseudogene (2)       |
| Or25    | LH25978 | 5020 | 26693-28486   | - | 4              | 406 | - | Multiple changes     |
| Or26    | -       | 5020 | 23515-26092   | - | 4              | 407 | - | New gene model       |
| Or27    | -       | 5020 | 20967-22987   | - | 4              | 403 | - | New gene model       |
| Or28PSE | -       | 5020 | 15793-17635   | - | 4              | 370 | - | Pseudogene (11)      |
| Or29    | -       | 5020 | 13718-15569   | - | 4              | 407 | - | New gene model       |
| Or30    | -       | 5020 | 10481-12404   | - | 4              | 402 | - | New gene model       |
| Or31PSE | LH25977 | 5020 | 1753-3539     | - | 4              | 292 | - | Pseudogene (1)       |
| Or32    | LH25400 | 4633 | 242188-244333 | - | 4              | 414 | - | Part of long model   |
| Or33    | LH25400 | 4633 | 237193-239341 | - | 4              | 412 | 2 | Part of long model   |
| Or34    | LH25400 | 4633 | 232737-234730 | - | 4              | 410 | - | Part of long model   |
| Or35    | -       | 4633 | 226424-228518 | - | 4              | 406 | - | New gene model       |
| Or36PSE | -       | 4633 | 224002-225997 | - | 4              | 408 | - | Pseudogene (3)       |
| Or37    | LH25400 | 4633 | 221387-223511 | - | 4              | 409 | - | Part of long model   |
| Or38    | LH25401 | 4633 | 217472-219484 | - | 4              | 403 | - | Multiple changes     |
| Or39    | -       | 4633 | 213972-215937 | - | 4              | 427 | - | New gene model       |
| Or40FIX | -       | 4633 | 210785-212699 | - | 4              | 411 | - | Fix frameshift       |
| Or41    | -       | 4633 | 205894-207912 | - | 4              | 410 | - | New gene model       |
| Or42    | LH12715 | 4633 | 201840-204335 | - | 4              | 411 | - | Multiple changes     |
| Or43    | LH12714 | 4633 | 198657-201324 | - | 4              | 400 | - | Multiple changes     |
| Or44PSE | -       | 4633 | 194452-196107 | - | 4              | 371 | - | Pseudogene (8)       |
| Or45    | LH12711 | 4633 | 190992-193463 | - | 5 <sup>b</sup> | 406 | - | Fine as is           |
| Or46    | LH12712 | 4633 | 187141-190462 | - | 5 <sup>b</sup> | 406 | - | Different final exon |
| Or47FIX | -       | 5082 | 797933-800054 | + | 4              | 394 | - | Fix frameshift       |
| Or48    | -       | 5082 | 801408-803265 | + | 4              | 400 | - | New gene model       |
| Or49    | -       | 5082 | 808411-810316 | + | 4              | 399 | - | New gene model       |
| Or50    | -       | 5082 | 812264-814336 | + | 4              | 392 | - | New gene model       |
| Or51    | -       | 5082 | 816066-818143 | + | 4              | 394 | - | New gene model       |
| Or52    | -       | 5082 | 820197-822168 | + | 4              | 398 | - | New gene model       |
| Or53PSE | -       | 5082 | 823913-825877 | + | 4              | 397 | - | Pseudogene (2)       |
| Or54    | LH26112 | 5082 | 827276-829195 | + | 4              | 398 | - | Part of long model   |
| Or55    | LH26112 | 5082 | 830852-832813 | + | 4              | 399 | - | Part of long model   |
| Or56    | LH26112 | 5082 | 834250-836133 | + | 4              | 395 | - | Part of long model   |
| Or57    | LH24938 | 5082 | 837963-840334 | + | 4              | 402 | - | First half of model  |
| Or58    | LH24938 | 5082 | 841401-843460 | + | 4              | 398 | - | Second half of model |
| Or59    | LH26113 | 5082 | 845883-848519 | + | 4              | 399 | - | Multiple changes     |
| Or60NTE | -       | 4955 | 118033-120675 | + | 6              | 392 | - | New gene model       |
| Or61NTE | -       | 4955 | 122500-124586 | + | 6              | 392 | - | New gene model       |
| Or62NP  | -       | 4955 | 130515-133155 | + | 6              | 392 | - | Pseudogene (1)       |
| Or63NTE | -       | 4955 | 134974-137065 | + | 6              | 392 | - | New gene model       |
| Or64NTE | -       | 4955 | 143488-145641 | + | 6              | 392 | - | New gene model       |
| Or65NP  | -       | 4955 | 150320-153703 | + | 6              | 393 | - | Pseudogene (4)       |
| Or66NTE | -       | 4955 | 156018-158117 | + | 6              | 393 | - | New gene model       |
| Or67NP  | -       | 4955 | 174009-176235 | + | 6              | 392 | - | Pseudogene (2)       |
| Or68NTE | -       | 4955 | 179558-181789 | + | 6              | 393 | 1 | New gene model       |
| Or69NTE | -       | 4955 | 187483-190513 | + | 6              | 399 | - | New gene model       |
| Or70NTE | -       | 4955 | 192632-195896 | + | 6              | 386 | - | New gene model       |
| Or71    | LH16353 | 4912 | 359883-361915 | - | 5              | 386 | - | One exon missing     |
| Or72    | LH25609 | 4912 | 357098-358951 | - | 5              | 387 | - | Multiple changes     |
| Or73    | LH25606 | 4912 | 351613-356208 | - | 5              | 376 | - | Multiple changes     |

|          |         |      |                |   |   |     |    |                      |
|----------|---------|------|----------------|---|---|-----|----|----------------------|
| Or74     | LH16358 | 4912 | 347629-350556  | - | 5 | 394 | -  | First half of model  |
| Or75     | LH16358 | 4912 | 344957-346862  | - | 5 | 393 | -  | Second half of model |
| Or76     | -       | 4912 | 342301-344206  | - | 5 | 395 | -  | New gene model       |
| Or77     | -       | 4912 | 336581-338420  | - | 5 | 387 | -  | New gene model       |
| Or78     | -       | 4912 | 333600-335554  | - | 5 | 378 | 1* | New gene model       |
| Or79     | LH25607 | 4912 | 330692-332832  | - | 5 | 377 | -  | Multiple changes     |
| Or80     | LH25605 | 4912 | 327495-329656  | - | 5 | 381 | -  | Multiple changes     |
| Or81     | LH16362 | 4912 | 324338-326378  | - | 5 | 386 | -  | Part of long model   |
| Or82     | LH16362 | 4912 | 319111-321197  | - | 5 | 385 | -  | Part of long model   |
| Or83     | LH16362 | 4912 | 315873-318204  | - | 5 | 385 | -  | Part of long model   |
| Or84     | LH16362 | 4912 | 311006-313142  | - | 5 | 385 | -  | Part of long model   |
| Or85     | LH16360 | 4912 | 307780-310128  | - | 5 | 382 | -  | Part of long model   |
| Or86     | LH16360 | 4912 | 304727-306893  | - | 5 | 384 | -  | Part of long model   |
| Or87     | LH16360 | 4912 | 301614-303679  | - | 5 | 386 | -  | Part of long model   |
| Or88PSE  | LH16360 | 4912 | 299196-300662  | - | 4 | 315 | -  | Pseudogene (9)       |
| Or89     | LH16360 | 4912 | 295780-298063  | - | 5 | 385 | -  | Fix sequence error   |
| Or90PSE  | LH16360 | 4912 | 292260-294781  | - | 5 | 382 | -  | Pseudogene (2)       |
| Or91     | LH16360 | 4912 | 288873-291222  | - | 5 | 386 | -  | Part of long model   |
| Or92     | LH16360 | 4912 | 285885-287918  | - | 5 | 387 | -  | Part of long model   |
| Or93PSE  | -       | 4912 | 279773-284881  | - | 5 | 387 | -  | Pseudogene (6)       |
| Or94     | LH25610 | 4912 | 276779-278823  | - | 5 | 384 | -  | Multiple changes     |
| Or95     | -       | 4912 | 273792-275848  | - | 5 | 387 | -  | New gene model       |
| Or96     | LH16352 | 4912 | 269853-272829  | - | 5 | 388 | -  | Multiple changes     |
| Or97     | LH25598 | 4912 | 267035-268898  | - | 5 | 385 | -  | Multiple changes     |
| Or98     | LH25597 | 4912 | 263352-265925  | - | 5 | 381 | -  | Multiple changes     |
| Or99     | LH25596 | 4912 | 259949-262145  | - | 5 | 385 | -  | Multiple changes     |
| Or100    | -       | 4912 | 256657-258770  | - | 5 | 384 | -  | New gene model       |
| Or101    | -       | 4912 | 253185-255497  | - | 5 | 385 | -  | New gene model       |
| Or102    | LH16356 | 4912 | 250070-252441  | - | 5 | 387 | -  | Multiple changes     |
| Or103    | LH25603 | 4912 | 246289-248157  | - | 5 | 380 | -  | Multiple changes     |
| Or104    | LH25611 | 4912 | 241017-242914  | - | 5 | 389 | -  | Multiple changes     |
| Or105FIX | -       | 4912 | 236946-239186  | - | 5 | 386 | -  | Fix frameshift       |
| Or106FIX | -       | 4912 | <234924-236241 | - | 5 | 386 | -  | Fix assembly gap     |
| Or107FIX | -       | 4912 | 233332-236241  | - | 5 | 386 | -  | Fix assembly gap     |
| Or108    | LH16357 | 4912 | 230197-232323  | - | 5 | 386 | -  | Multiple changes     |
| Or109    | -       | 4912 | 226817-229070  | - | 5 | 386 | 1  | New gene model       |
| Or110    | LH16363 | 4912 | 223676-225988  | - | 5 | 386 | -  | Multiple changes     |
| Or111    | LH16359 | 4912 | 220465-222753  | - | 5 | 387 | -  | Needs earlier start  |
| Or112    | LH16361 | 4912 | 217437-219758  | - | 5 | 385 | -  | First half of model  |
| Or113    | LH16361 | 4912 | 214429-216498  | - | 5 | 394 | -  | Second half of model |
| Or114    | LH16365 | 4912 | 211642-213719  | - | 5 | 396 | 1* | Needs earlier start  |
| Or115    | LH25604 | 4912 | 208861-210936  | - | 5 | 396 | -  | Needs earlier start  |
| Or116    | LH16368 | 4912 | 205263-207897  | - | 5 | 386 | -  | Multiple changes     |
| Or117    | LH21671 | 5011 | 29975-32006    | - | 4 | 370 | -  | Multiple changes     |
| Or118    | LH25955 | 5011 | 26858-29009    | - | 4 | 373 | -  | Multiple changes     |
| Or119    | LH25956 | 5011 | 23654-25896    | - | 4 | 374 | -  | Multiple changes     |
| Or120FIX | LH21668 | 5011 | 13777-15606    | - | 4 | 368 | -  | Fix frameshift       |
| Or121    | LH21670 | 5011 | 10319-12352    | - | 4 | 370 | -  | Multiple changes     |
| Or122    | LH21669 | 5011 | 7492-9358      | - | 4 | 368 | -  | Multiple changes     |
| Or123FIX | -       | 5011 | 4077-6550      | - | 4 | 379 | -  | Fix assembly gap     |
| Or124    | -       | 5011 | 695-2591       | - | 4 | 369 | -  | New gene model       |
| Or125    | -       | 2461 | 15-1902        | + | 4 | 362 | -  | New gene model       |
| Or126    | LH10129 | 2461 | 3173-5141      | + | 4 | 369 | -  | First half of model  |
| Or127    | LH10129 | 2461 | 6473-8227      | + | 4 | 370 | -  | Second half of model |
| Or128    | -       | 2461 | 9407-11138     | + | 4 | 366 | -  | New gene model       |
| Or129    | -       | 2461 | 12144-14190    | + | 4 | 370 | -  | New gene model       |
| Or130    | -       | 2461 | 15241-17360    | + | 4 | 370 | -  | New gene model       |
| Or131    | -       | 2461 | 18430-20985    | + | 4 | 367 | -  | New gene model       |
| Or132    | -       | 2461 | 22133-24258    | + | 4 | 372 | -  | New gene model       |
| Or133    | -       | 2461 | 25587-27983    | + | 4 | 368 | -  | New gene model       |
| Or134FIX | -       | 2461 | 29445-31440    | + | 4 | 368 | -  | Fix assembly gap     |
| Or135    | -       | 2461 | 32441-34492    | + | 4 | 368 | -  | New gene model       |
| Or136    | -       | 2461 | 36463-38194    | + | 4 | 369 | -  | New gene model       |
| Or137    | LH18458 | 4949 | 134810-136258  | + | 4 | 384 | -  | New gene model       |
| Or138    | LH18459 | 4949 | 138197-141767  | + | 4 | 382 | -  | Different C-terminus |
| Or139    | LH25728 | 4949 | 176458-178148  | - | 4 | 383 | -  | Multiple changes     |



|          |         |      |                  |   |   |     |    |                            |
|----------|---------|------|------------------|---|---|-----|----|----------------------------|
| Or140FIX | LH25730 | 4949 | 171052-175190    | - | 4 | 381 | -  | Fix frameshift             |
| Or141    | LH25730 | 4949 | 167683-169647    | - | 4 | 382 | -  | Second half of model       |
| Or142    | -       | 4949 | 163826-165836    | - | 4 | 382 | -  | New gene model             |
| Or143    | LH18464 | 4949 | 160306-162494    | - | 4 | 380 | -  | Part of long model         |
| Or144    | LH18464 | 4949 | 156408-158667    | - | 4 | 385 | -  | Part of long model         |
| Or145    | LH18464 | 4949 | 152289-154977    | - | 4 | 380 | -  | Part of long model         |
| Or146    | LH25711 | 4940 | 3541813-3545045  | + | 2 | 382 | -  | Multiple changes           |
| Or147    | LH25713 | 4940 | 3546152-3549378  | + | 2 | 398 | -  | Needs C-terminus           |
| Or148PSE | -       | 4940 | 3550363-3551822  | + | 2 | 367 | -  | Pseudogene (12)            |
| Or149    | LH25716 | 4940 | 3553310-3555054  | + | 3 | 402 | -  | Different C-terminus       |
| Or150    | LH18292 | 4940 | 3556356-3558239  | + | 2 | 396 | -  | Different C-terminus       |
| Or151    | -       | 4940 | 3559106-3561273  | + | 3 | 397 | -  | New gene model             |
| Or152    | LH25712 | 4940 | 3561859-3563873  | + | 3 | 396 | -  | Multiple changes           |
| Or153    | LH25717 | 4940 | 3565417-3567456  | + | 3 | 396 | -  | Multiple changes           |
| Or154    | LH25718 | 4940 | 3570241-3572758  | + | 3 | 396 | -  | Multiple changes           |
| Or155    | -       | 4940 | 3575226-3577207  | + | 3 | 396 | -  | New gene model             |
| Or156    | -       | 4940 | 3578108-3581091  | + | 2 | 391 | -  | New gene model             |
| Or157    | LH18291 | 4940 | 3583053-3585281  | + | 3 | 395 | 1* | First half of model        |
| Or158    | LH18291 | 4940 | 3586321-3588009  | + | 2 | 403 | -  | Second half of model       |
| Or159    | LH18288 | 4940 | 3588544-3591573  | + | 3 | 398 | -  | Multiple changes           |
| Or160    | LH18289 | 4940 | 3593820-3596738  | + | 3 | 391 | -  | Internal exon missing      |
| Or161    | LH25648 | 4926 | 2390040-2392769  | + | 3 | 392 | -  | Multiple changes           |
| Or162    | LH25649 | 4926 | 2393694-2395798  | + | 3 | 392 | -  | Internal exon needed       |
| Or163    | LH25651 | 4926 | 2396458-2398610  | + | 3 | 392 | -  | Multiple changes           |
| Or164PSE | -       | 4926 | 2400386-2402130  | + | 3 | 389 | -  | Pseudogene (13)            |
| Or165    | LH25644 | 4926 | 2402660-2404541  | + | 3 | 392 | -  | Internal exon needed       |
| Or166PSE | -       | 4926 | 2405109-2406946  | + | 3 | 318 | -  | Pseudogene (5)             |
| Or167    | LH25652 | 4926 | 2408094-2410470  | + | 3 | 396 | -  | Part of long model         |
| Or168    | LH25652 | 4926 | 2412430-2414567  | + | 3 | 397 | -  | Part of long model         |
| Or169PSE | LH25652 | 4926 | 2416771-2418631  | + | 3 | 378 | -  | Pseudogene (2)             |
| Or170    | LH25652 | 4926 | 2419700-2421337  | + | 3 | 392 | -  | Part of long model         |
| Or171NP  | LH17512 | 4929 | <935128-939745   | + | 6 | 390 | -  | Pseudogene (3)             |
| Or172NTE | LH17511 | 4929 | <941424-943717   | + | 6 | 389 | -  | Multiple changes           |
| Or173NTE | LH11296 | 4452 | <171937-174311   | + | 6 | 389 | -  | First half of model        |
| Or174NTE | LH11296 | 4452 | <175936-177891   | + | 6 | 389 | -  | Second half of model       |
| Or175NTE | -       | 4452 | <179243-181435   | + | 6 | 389 | -  | New gene model             |
| Or176NTE | -       | 4452 | <182850-186350   | + | 6 | 391 | -  | New gene model             |
| Or177NTE | -       | 4452 | <188590-191353   | + | 6 | 391 | -  | New gene model             |
| Or178FN  | -       | 4452 | <192805-195239   | + | 6 | 391 | -  | Fix assembly gap           |
| Or179JFN | -       | 4452 | <197237->200640  | + | 6 | 391 | -  | Join across two scaffolds  |
|          |         | 4923 | <1->1156         | + | 6 |     |    | fix assembly gap           |
| Or180FN  | LH25636 | 4923 | <4718-8245       | + | 6 | 391 | -  | Fix frameshift             |
| Or181NTE | LH25636 | 4923 | <9989-12608      | + | 6 | 391 | -  | Part of long model         |
| Or182NTE | LH25636 | 4923 | <14005-16496     | + | 6 | 388 | -  | Part of long model         |
| Or183NTE | LH25633 | 4923 | <18307-20886     | + | 6 | 390 | -  | Multiple changes           |
| Or184NTE | -       | 4923 | <22562-24957     | + | 6 | 389 | -  | New gene model             |
| Or185NTE | -       | 4923 | <26035-28104     | + | 6 | 387 | -  | New gene model             |
| Or186NTE | -       | 4923 | <29261-31275     | + | 6 | 387 | -  | New gene model             |
| Or187FN  | -       | 4923 | <32617-35067     | + | 6 | 388 | -  | Fix frameshift             |
| Or188PSE | -       | 4923 | <35558-37114     | + | 5 | 297 | -  | Pseudogene (5)             |
| Or189NP  | -       | 4923 | <38213-40758     | + | 6 | 388 | -  | Pseudogene (1)             |
| Or190PSE | LH10470 | 4923 | <41240-42762     | + | 5 | 297 | -  | Pseudogene (5)             |
| Or191FN  | -       | 4923 | <43902-46044     | + | 6 | 389 | -  | Fix assembly gap           |
| Or192NTE | -       | 4923 | <48941-50970     | + | 6 | 390 | -  | New gene model             |
| Or193NTE | -       | 4923 | <52302-54821     | + | 6 | 389 | -  | New gene model             |
| Or194NTE | LH25635 | 4923 | <56088-58153     | + | 6 | 389 | -  | First half of model        |
| Or195NTE | LH25635 | 4923 | <59550-61791     | + | 6 | 387 | -  | Second half of model       |
| Or196NTE | LH25637 | 4923 | <62853-66150     | + | 6 | 387 | -  | Multiple changes           |
| Or197FNC | -       | 4923 | <68391->70673    | + | 6 | 371 | -  | Partially fix assembly gap |
| Or198FN  | -       | 4923 | <72508-75897     | + | 6 | 387 | -  | Fix assembly gap           |
| Or199FN  | LH25634 | 4923 | <78150-81002     | + | 6 | 388 | -  | Fix assembly gap           |
| Or200NTE | LH25632 | 4923 | <82501-85235     | + | 6 | 387 | -  | Multiple changes           |
| Or201NTE | -       | 4923 | <87449-90341     | + | 6 | 388 | -  | New gene model             |
| Or202NTE | LH16750 | 4923 | <95442-98926     | + | 6 | 388 | -  | Multiple changes           |
| Or203NTE | LH13656 | 4923 | <2419045-2421433 | + | 6 | 388 | -  | Multiple changes           |
| Or204PSE | -       | 4909 | 664407-667584    | - | 6 | 333 | -  | Pseudogene (12)            |

|          |         |      |                 |   |   |     |    |                            |
|----------|---------|------|-----------------|---|---|-----|----|----------------------------|
| Or205    | LH23982 | 5070 | 27167-34800     | - | 5 | 387 | -  | Fuse two gene models;      |
|          | LH23984 |      |                 |   |   |     |    | across a 5 kb intron       |
| Or206NTE | LH19170 | 4964 | 320440-323154   | + | 6 | 384 | -  | N-terminal exon unidenti   |
| Or207    | LH19170 | 4964 | 325502-329195   | + | 6 | 389 | -  | Part of long model         |
| Or208    | LH19170 | 4964 | 330187-334399   | + | 6 | 393 | -  | Part of long model         |
| Or209    | LH22725 | 5033 | 101866-109632   | + | 7 | 399 | 1* | Multiple changes           |
| Or210    | LH23858 | 5066 | 863837-867843   | + | 5 | 438 | -  | Fine as is                 |
| Or211JOI | LH20522 | 4989 | <1-1197         | - | 4 | 401 | -  | Join across two scaffolds  |
|          |         | 4923 | 152493-153827   | - |   |     |    | assembly problem?          |
| Or212    | LH12905 | 4653 | 737578-739768   | - | 5 | 402 | -  | First half of model        |
| Or213    | LH12905 | 4653 | 731987-734515   | - | 5 | 403 | -  | Second half of model       |
| Or214    | LH25733 | 4950 | 40394-42536     | - | 4 | 408 | -  | Multiple changes           |
| Or215    | LH23980 | 5070 | 76078-176164    | - | 5 | 376 | -  | Needs a C-terminus         |
| Or216    | LH18732 | 4956 | 20162-22703     | - | 5 | 379 | -  | Multiple changes           |
| Or217FIX | LH18727 | 4956 | <25380-28349    | + | 6 | 373 | -  | Fix assembly gap           |
| Or218    | LH21199 | 5005 | 1587704-1592738 | - | 5 | 378 | -  | Multiple changes           |
| Or219FIX | -       | 5005 | 1579650-1584773 | - | 5 | 378 | -  | Fix assembly gap           |
| Or220    | LH11487 | 4465 | 9057-84984      | + | 5 | 380 | -  | Multiple changes           |
| Or221IC  | LH23895 | 5068 | <60692-107121   | - | 5 | 322 | -  | Exons 3 and 6 missing      |
| Or222    | LH19011 | 4958 | 263992-268751   | - | 5 | 372 | -  | Fine as is                 |
| Or223JOI | LH15447 | 4861 | 4635->25360     | + | 5 | 370 | -  | Join across three scaffold |
|          | LH15442 | 4963 | <1->33715       | + |   |     |    | awkward because implies    |
|          |         | 4843 | 93514->105292   | - |   |     |    | assembly problem in 486    |
| Or224    | LH15148 | 4856 | 233563-236416   | + | 5 | 402 | 2  | Fine as is                 |
| Or225    | LH24139 | 5073 | 44540-46128     | - | 4 | 387 | -  | Fine as is                 |
| Or226    | LH11096 | 4431 | 80014-83806     | + | 4 | 388 | -  | Needs a different C-termi  |
| Or227    | -       | 5018 | 2294078-2296134 | - | 5 | 386 | -  | New gene model             |
| Or228    | LH22142 | 5018 | 2287166-2288982 | - | 4 | 376 | -  | First part of model        |
| Or229    | LH22142 | 5018 | 2283805-2286406 | - | 5 | 384 | -  | Second part of model       |
| Or230    | LH22143 | 5018 | 2281480-2283208 | - | 5 | 380 | -  | Multiple changes           |
| Or231    | LH22141 | 5018 | 2277756-2280176 | - | 5 | 381 | -  | Needs a N-terminus         |
| Or232    | LH23776 | 5065 | 608871-611426   | + | 8 | 400 | -  | Multiple changes           |
| Or233    | LH23496 | 5057 | 215473-218709   | + | 8 | 389 | -  | Multiple changes           |
| Or234    | LH26046 | 5057 | 219045-221760   | - | 8 | 400 | -  | Second part of model       |
| Or235    | LH26046 | 5057 | 222750-225624   | - | 8 | 401 | -  | First part of model        |
| Or236PSE | -       | 5057 | 226670-229312   | - | 8 | 318 | -  | Pseudogene (8)             |
| Or237PSE | LH26038 | 5057 | 230035-232201   | - | 8 | 383 | -  | Pseudogene (1)             |
| Or238    | LH26038 | 5057 | 232736-235196   | - | 8 | 395 | -  | First part of model        |
| Or239    | -       | 5057 | 237949-240493   | + | 8 | 413 | -  | New gene model             |
| Or240    | LH23495 | 5057 | 244925-247502   | + | 8 | 415 | -  | Multiple changes           |
| Or241    | LH24047 | 5057 | 248687-251094   | - | 8 | 398 | -  | Multiple changes           |
| Or242    | LH26045 | 5057 | 252884-255224   | - | 8 | 400 | -  | Second part of model       |
| Or243    | LH26045 | 5057 | 256193-258665   | - | 8 | 403 | -  | First part of model        |
| Or244    | LH26048 | 5057 | 261164-263610   | - | 8 | 402 | -  | Multiple changes           |
| Or245    | LH23507 | 5057 | 268035-270962   | + | 8 | 407 | -  | Part of long model         |
| Or246    | LH23507 | 5057 | 271874-274568   | + | 8 | 408 | -  | Part of long model         |
| Or247PSE | LH23507 | 5057 | 277157-279514   | + | 8 | 415 | -  | Pseudogene (2)             |
| Or248PSE | LH23507 | 5057 | 280606-283007   | + | 8 | 404 | -  | Pseudogene (1)             |
| Or249    | LH23507 | 5057 | 283796-286444   | + | 8 | 398 | -  | Part of long model         |
| Or250    | -       | 5057 | 288418-290845   | + | 8 | 392 | -  | New gene model             |
| Or251PSE | LH26052 | 5057 | 291690-294483   | + | 8 | 411 | -  | Pseudogene (3)             |
| Or252    | -       | 5057 | 296590-299137   | + | 8 | 390 | -  | New gene model             |
| Or253    | LH23505 | 5057 | 301113-303729   | + | 8 | 388 | -  | Multiple changes           |
| Or254FIX | -       | 5057 | 305338-307469   | + | 8 | 398 | -  | Fix two frameshifts        |
| Or255    | -       | 5057 | 308634-311124   | + | 8 | 400 | -  | New gene model             |
| Or256    | LH23506 | 5057 | 313127-315644   | + | 8 | 397 | -  | Multiple changes           |
| Or257    | LH26051 | 5057 | 316253-318934   | + | 8 | 397 | -  | Multiple changes           |
| Or258IP  | -       | 5057 | 320217-322372   | + | 8 | 361 | -  | Pseudogene (3) with gap    |
| Or259    | LH26050 | 5057 | 324472-326878   | + | 8 | 403 | -  | Part of long model         |
| Or260FIX | LH26050 | 5057 | 332210-334589   | + | 8 | 402 | -  | Fix frameshift and stop    |
| Or261    | LH26050 | 5057 | 336289-338710   | + | 8 | 403 | -  | Part of long model         |
| Or262    | LH23509 | 5057 | 339869-343193   | - | 8 | 395 | -  | Multiple changes           |
| Or263    | LH23511 | 5057 | 343991-346895   | - | 8 | 388 | -  | Multiple changes           |
| Or264    | -       | 5057 | 56423-59089     | - | 8 | 395 | -  | New gene model             |
| Or265FPC | -       | 5057 | 52757-54376     | - | 5 | 281 | -  | Pseudogene (3); partial fi |
| Or266FIX | -       | 5057 | 46495-50025     | - | 8 | 390 | 1  | Fix assembly gap           |

|          |         |      |                  |   |   |     |   |                           |
|----------|---------|------|------------------|---|---|-----|---|---------------------------|
| Or267    | -       | 5057 | 37221-40640      | - | 8 | 386 | - | New gene model            |
| Or268    | -       | 5057 | 32512-36018      | - | 8 | 390 | - | New gene model            |
| Or269    | -       | 5057 | 27865-31313      | - | 8 | 390 | - | New gene model            |
| Or270JC  | -       | 5057 | 23590-26617      | - | 8 | 376 | - | Join across two scaffolds |
|          |         | 4638 | 7249-7787        | + |   |     |   | final exon still missing  |
| Or271    | -       | 5057 | 13165-22039      | - | 8 | 392 | - | New gene model            |
| Or272    | -       | 5057 | 8640-12102       | - | 8 | 390 | - | New gene model            |
| Or273    | -       | 5057 | 3706-6628        | - | 8 | 391 | - | New gene model            |
| Or274FIX | -       | 5057 | <1-2515          | - | 8 | 392 | 1 | Extend scaffold           |
| Or275    | -       | 4662 | 1202-7933        | - | 8 | 391 | - | New gene model            |
| Or276FIX | -       | 4929 | 1946592->1953169 | - | 8 | 393 | - | Extend scaffold           |
| Or277    | -       | 4929 | 1941424-1944919  | - | 8 | 391 | - | New gene model            |
| Or278    | -       | 4929 | 1936681-1939788  | - | 8 | 391 | - | New gene model            |
| Or279    | -       | 4929 | 1931553-1935324  | - | 8 | 391 | - | New gene model            |
| Or280    | -       | 4929 | 446258-449028    | + | 8 | 395 | - | New gene model            |
| Or281    | -       | 5009 | 149207-151964    | - | 8 | 393 | - | New gene model            |
| Or282    | -       | 5009 | 145337-148253    | - | 8 | 392 | - | New gene model            |
| Or283NTH | -       | 5009 | 140198->142633   | - | 8 | 344 | - | First exon missing in gap |
| Or284    | -       | 5009 | 136062-138799    | - | 8 | 391 | - | New gene model            |
| Or285    | -       | 5009 | 131750-135255    | - | 8 | 393 | - | New gene model            |
| Or286    | -       | 5009 | 126818-129918    | - | 8 | 394 | - | New gene model            |
| Or287PSE | -       | 5009 | 118037-121437    | - | 8 | 385 | - | Pseudogene (3)            |
| Or288FIX | -       | 5009 | 112610-115680    | - | 8 | 395 | - | Fix frameshift            |
| Or289FIX | -       | 5009 | 108623-111706    | - | 8 | 393 | - | Fix frameshift            |
| Or290FIX | -       | 5009 | 104623-107823    | - | 8 | 393 | - | Fix frameshift            |
| Or291    | -       | 5009 | 100326-103828    | - | 8 | 393 | - | New gene model            |
| Or292    | -       | 5009 | 95481-99527      | - | 8 | 393 | - | New gene model            |
| Or293    | -       | 5009 | 91624-94594      | - | 8 | 392 | - | New gene model            |
| Or294PSE | -       | 5009 | 85329-89059      | - | 8 | 388 | - | Pseudogene (5)            |
| Or295PSE | -       | 5009 | 82701-84535      | - | 6 | 254 | - | Pseudogene (2)            |
| Or296    | -       | 5009 | 78929-81758      | - | 8 | 392 | - | New gene model            |
| Or297    | -       | 5009 | 75500-78334      | - | 8 | 395 | - | New gene model            |
| Or298    | -       | 5009 | 72059-74920      | - | 8 | 393 | - | New gene model            |
| Or299PSE | -       | 5009 | 67244-70407      | - | 8 | 394 | - | Pseudogene (1)            |
| Or300    | -       | 5009 | 62860-65850      | - | 8 | 393 | - | New gene model            |
| Or301    | -       | 5009 | 55954-59354      | - | 8 | 389 | - | New gene model            |
| Or302    | -       | 5009 | 47774-51801      | - | 8 | 391 | - | New gene model            |
| Or303FIX | -       | 5009 | 40472-42833      | - | 8 | 392 | - | Fix assembly gap          |
| Or304    | -       | 5009 | 36353-38951      | - | 8 | 393 | - | New gene model            |
| Or305    | -       | 5009 | 32857-35268      | - | 8 | 395 | - | New gene model            |
| Or306    | -       | 5009 | 29824-32239      | - | 8 | 396 | - | New gene model            |
| Or307    | -       | 5009 | 26845-29211      | - | 8 | 396 | - | New gene model            |
| Or308    | -       | 5009 | 23409-26247      | - | 8 | 394 | - | New gene model            |
| Or309    | -       | 5009 | 16837-19690      | - | 8 | 394 | - | New gene model            |
| Or310    | -       | 5009 | 10813-14257      | - | 8 | 391 | - | New gene model            |
| Or311    | -       | 5009 | 7339-9966        | - | 8 | 394 | - | New gene model            |
| Or312    | -       | 5009 | 3218-5985        | - | 8 | 390 | - | New gene model            |
| Or313    | -       | 4834 | 802002-804791    | + | 8 | 392 | - | New gene model            |
| Or314    | -       | 4834 | 805822-809087    | + | 8 | 385 | - | New gene model            |
| Or315    | -       | 4834 | 809874-812579    | + | 8 | 390 | - | New gene model            |
| Or316    | -       | 4834 | 813276-815887    | + | 8 | 394 | - | New gene model            |
| Or317    | -       | 4834 | 817365-819805    | + | 8 | 393 | - | New gene model            |
| Or318    | -       | 4834 | 824259-827620    | + | 8 | 393 | - | New gene model            |
| Or319    | -       | 4834 | 829215-832227    | + | 8 | 392 | 1 | New gene model            |
| Or320    | -       | 4834 | 833252-835944    | + | 8 | 401 | - | New gene model            |
| Or321PSE | -       | 4834 | 837085-840541    | + | 8 | 392 | - | Pseudogene (1)            |
| Or322    | -       | 4834 | 845792-848693    | + | 8 | 400 | - | New gene model            |
| Or323    | -       | 4834 | 852461-854980    | + | 8 | 387 | - | New gene model            |
| Or324    | LH14860 | 4834 | 856325-859263    | + | 8 | 393 | - | Part of long model        |
| Or325    | LH14860 | 4834 | 860022-863192    | + | 8 | 394 | - | Part of long model        |
| Or326    | LH14860 | 4834 | 865887-868954    | + | 8 | 395 | - | Part of long model        |
| Or327    | -       | 4834 | 871234-874432    | + | 8 | 392 | - | New gene model            |
| Or328    | -       | 4834 | 875452-878103    | + | 8 | 391 | - | New gene model            |
| Or329    | -       | 4834 | 879383-882352    | + | 8 | 393 | - | New gene model            |
| Or330    | -       | 4834 | 883786-886665    | + | 8 | 392 | - | New gene model            |
| Or331    | -       | 4834 | 888406-891218    | + | 8 | 394 | - | New gene model            |

|          |         |      |                  |   |   |     |   |                             |
|----------|---------|------|------------------|---|---|-----|---|-----------------------------|
| Or332    | -       | 4834 | 892015-894763    | + | 8 | 393 | - | New gene model              |
| Or333    | -       | 4834 | 895693-898387    | + | 8 | 397 | - | New gene model              |
| Or334    | -       | 4834 | 900226-902455    | + | 8 | 394 | - | New gene model              |
| Or335PSE | -       | 4834 | 904449-906702    | + | 8 | 378 | - | Pseudogene (4)              |
| Or336    | -       | 4834 | 907637-910019    | + | 8 | 398 | - | New gene model              |
| Or337    | LH14219 | 4756 | 10772-13560      | - | 8 | 391 | - | Multiple changes            |
| Or338    | LH22780 | 5036 | 13642-15694      | - | 8 | 395 | - | Multiple changes            |
| Or339FIX | LH19029 | 4958 | 437869->443156   | + | 8 | 392 | - | Fix frameshift and gap      |
| Or340FIX | -       | 4958 | 444610->446886   | + | 8 | 392 | - | Fix two assembly gaps       |
| Or341    | LH19031 | 4958 | 451425-453999    | + | 8 | 391 | - | Multiple changes            |
| Or342    | LH20416 | 4985 | 4586498-4588513  | + | 8 | 392 | - | Multiple changes            |
| Or343    | LH24326 | 5077 | 127035-129001    | + | 8 | 391 | - | Multiple changes            |
| Or344PSE | LH17565 | 4930 | 35250-37618      | + | 8 | 390 | - | Pseudogene (1)              |
| Or345    | LH18671 | 4953 | 564223-566505    | + | 8 | 402 | - | First half of model         |
| Or346    | LH18671 | 4953 | 567889-570720    | + | 8 | 402 | - | Second half of model        |
| Or347    | LH18672 | 4953 | 571637-574299    | + | 8 | 399 | - | Multiple changes            |
| Or348    | LH18673 | 4953 | 575619-578012    | + | 8 | 399 | - | Multiple changes            |
| Or349    | LH18722 | 4956 | 29253-33422      | + | 8 | 396 | - | First part of large model   |
| Or350    | LH26058 | 5065 | 721047-717277    | - | 8 | 394 | - | Multiple changes            |
| Or351FP  | -       | 4938 | 334243->336846   | + | 8 | 397 | - | Pseudogene (3)              |
| Or352FN  | -       | 4938 | <337671-339474   | + | 8 | 344 | - | Fix gap; first exon missing |
| Or353JP  | LH24060 | 4938 | 340465->342740   | + | 8 | 399 | - | Join across two scaffolds   |
|          |         | 5071 | 1760818->1765287 | - |   |     |   | pseudogene (2)              |
| Or354    | LH24060 | 5071 | 1757467-1759776  | - | 8 | 398 | - | Second half of model        |
| Or355    | LH20606 | 4989 | 1352963-1355444  | - | 8 | 406 | - | Multiple changes            |
| Or356    | LH20597 | 4989 | 1356329-1358794  | + | 8 | 403 | - | Multiple changes            |
| Or357    | LH20607 | 4989 | 1362107-1364546  | - | 8 | 406 | - | Part of long model          |
| Or358    | LH20607 | 4989 | 1368393-1370801  | - | 8 | 406 | - | Part of long model          |
| Or359PSE | LH20607 | 4989 | 1380313-1382798  | - | 8 | 407 | - | Pseudogene (1)              |
| Or360FIX | LH25885 | 4989 | 1383695-1386154  | + | 8 | 401 | - | Fix frameshift              |
| Or361    | LH25885 | 4989 | 1387893-1390055  | + | 8 | 403 | - | Second part of model        |
| Or362FIX | LH20614 | 4989 | 1391714-1394069  | + | 8 | 402 | - | Fix three frameshifts       |
| Or363    | LH20614 | 4989 | 1395227-1398138  | + | 8 | 404 | - | Second part of model        |
| Or364FIX | -       | 4989 | 1417400-1423818  | + | 8 | 402 | - | Fix two assembly gaps       |
| Or365    | LH18177 | 4940 | 1935928-1938616  | + | 8 | 403 | - | First part of model         |
| Or366    | LH18177 | 4940 | 1939585-1942816  | + | 8 | 402 | - | Second part of model        |
| Or367    | LH10827 | 4321 | 201492-203583    | - | 8 | 371 | - | Multiple changes            |

Ionotropic Receptors (IRs). We annotated 32 Ionotropic Receptors in *L. humile* (Table S12). Phylogenetic tree of *L. humile* (blue), *A. mellifera* (green) and *N. vitripennis* (red) iGluRs and IRs, as well as representative fruit fly (*D. melanogaster*, black) orthologs (113). Two ant-specific expansions of IRs are highlighted with a blue vertical line. Protein sequences were aligned with PROBCONS, and the tree was built with RaxML under the WAG model of substitution with 1000 bootstrap replicates. Bootstrap values for each branch are indicated on the tree. The scale bar represents the number of substitutions per site. IR8a and IR25a have been proposed to derive from a non-NMDA iGluR, but in this tree these IR clades group with NMDA receptors with low bootstrap values, most likely due to the number of sequences analyzed.

**Table S12.** Details of Ionotropic Receptor (IR) annotation.

| Name        | AED                | Scaffold         | Strand | Start   | Stop    | Length | Introns | Comments | Notes                                 |
|-------------|--------------------|------------------|--------|---------|---------|--------|---------|----------|---------------------------------------|
| LineAMPA01  | 0.130991810806196  | scf7180001005069 | -      | 498669  | 481482  | 861    | 14      |          |                                       |
| LineIR25a   | 0.0613037123648057 | scf7180001004995 | -      | 760056  | 755488  | 843    | 4       |          | Added N-term and C-term               |
| LineIR307   | 0.0157284768211921 | scf7180001004929 | +      | 748008  | 749816  | 603    | 0       |          |                                       |
| LineIR308   | 0.0461658841940532 | scf7180001004978 | +      | 59264   | 61177   | 638    | 0       |          |                                       |
| LineIR309   | novel              | scf7180001004978 | -      | 56030   | 54594   | 386    | 3       | NTE      | No ATG                                |
| LineIR310   | 0.400442708333333  | scf7180001005033 | -      | 22640   | 20895   | 281    | 3       | NTE      | No ATG, modified N-term and C-term    |
| LineIR311.1 | novel              | scf7180001005018 | +      | 4462665 | 4464479 | 605    | 0       |          |                                       |
| LineIR311.2 | novel              | scf7180001005018 | +      | 4466164 | 4466943 | 260    | 0       | NTE      | No ATG                                |
| LineIR311.3 | novel              | scf7180001005018 | +      | 4468697 | 4469494 | 266    | 0       | NTE      | No ATG                                |
| LineIR311.4 | novel              | scf7180001005018 | +      | 4473679 | 4474477 | 266    | 0       | NTE, PSE | No ATG, 1 frameshift                  |
| LineIR311.5 | novel              | scf7180001005018 | +      | 4471196 | 4471994 | 266    | 0       | NTE, PSE | No ATG, 1 frameshift                  |
| LineIR311.6 | novel              | scf7180001005018 | +      | 4476225 | 4477019 | 265    | 0       | NTE      | No ATG                                |
| LineIR311.7 | novel              | scf7180001005018 | +      | 4461188 | 4461985 | 266    | 0       | NTE      | No ATG                                |
| LineIR312   | 0.209175493149354  | scf7180001004934 | +      | 829250  | 833940  | 501    | 8       |          |                                       |
| LineIR313.1 | 0.372203887055372  | scf7180001004574 | -      | 72860   | 70934   | 367    | 5       | NTE      | No ATG. Modified N-term, added C-term |
| LineIR313.2 | novel              | scf7180001004574 | -      | 103275  | 101307  | 367    | 5       | NTE      | No ATG                                |
| LineIR315   | 0.272507435431526  | scf7180001004958 | +      | 762376  | 765039  | 481    | 7       |          |                                       |
| LineIR316   | 0.10371278140886   | scf7180001004922 | +      | 10137   | 14473   | 637    | 3       |          |                                       |
| LineIR317.1 | novel              | scf7180001004838 | +      | 18658   | 21233   | 581    | 4       |          | No ATG                                |
| LineIR317.2 | novel              | scf7180001004838 | +      | 6870    | 8359    | 245    | 1       | NTE      | No ATG                                |
| LineIR317.3 | novel              | scf7180001004838 | +      | 15992   | 17264   | 245    | 1       | NTE      | No ATG                                |
| LineIR318   | 0.150796538994745  | scf7180001004548 | +      | 64685   | 70553   | 783    | 8       |          |                                       |
| LineIR319   | 0.314074595355384  | scf7180001004995 | -      | 202290  | 195262  | 473    | 8       | NTE, INT | No ATG                                |
| LineIR68a   | 0.120852335084016  | scf7180001004957 | -      | 104667  | 100948  | 501    | 5       |          |                                       |
| LineIR75f.1 | 0.334689153439153  | scf7180001005073 | -      | 1429582 | 1426592 | 625    | 9       |          |                                       |
| LineIR75f.2 | novel              | scf7180001005073 | -      | 1420314 | 1414369 | 610    | 6       | PSE      | 1 frameshift                          |
| LineIR75f.3 | 0.319230769230769  | scf7180001005073 | -      | 1424598 | 1420762 | 621    | 6       | PSE      | No ATG, added N-term, 1 frameshift    |
| LineIR75u.1 | novel              | scf7180001004421 | +      | 561351  | 564853  | 586    | 7       |          | No ATG                                |
| LineIR75u.2 | novel              | scf7180001004421 | +      | 570315  | 573111  | 460    | 6       | NTE      | No ATG                                |
| LineIR75u.3 | novel              | scf7180001004421 | +      | 578230  | 581254  | 576    | 7       |          | No ATG                                |
| LineIR76b   | 0.0525244802146211 | scf7180001004861 | -      | 1305417 | 1303067 | 546    | 6       |          |                                       |
| LineIR8a    | 0.15557773157923   | scf7180001004803 | -      | 583159  | 576756  | 918    | 15      |          | Added C-term                          |
| LineIR93a   | novel              | scf7180001005005 | +      | 685891  | 691304  | 860    | 14      |          |                                       |
| LineKA01    | 0.470534586666534  | scf7180001004868 | -      | 604919  | 570511  | 829    | 12      |          | No ATG, added N-term and C-term       |
| LineKA02    | 0.130523604680125  | scf7180001004985 | -      | 4420607 | 4414044 | 902    | 14      |          |                                       |
| LineKA03    | 0.408257627375274  | scf7180001005071 | +      | 1471256 | 1494318 | 731    | 10      |          | Added N-term and C-term               |
| LineKA04    | novel              | scf7180001005071 | +      | 1513227 | 1520004 | 838    | 13      |          | No ATG                                |
| LineKA05    | 0.300944854602471  | scf7180001005071 | +      | 1503518 | 1510940 | 906    | 14      |          | Removed C-term                        |
| LineNMDAR01 | 0.0816666666666667 | scf7180001003344 | -      | 47477   | 41922   | 899    | 14      |          |                                       |
| LineNMDAR02 | 0.159104710054835  | scf7180001004877 | -      | 591329  | 582044  | 544    | 9       | NTE      | Modified C-term                       |
| LineNMDAR03 | 0.0612734286453341 | scf7180001004434 | -      | 102556  | 95528   | 1367   | 7       |          | Modified C-term                       |

|         |    |     |                        |
|---------|----|-----|------------------------|
| IRs     | 32 | NTE | Missing N-terminal end |
| AMPA    | 1  | CTE | Missing C-terminal end |
| NMDA    | 3  | INT | Internal gap           |
| Kainate | 5  | PSE | Pseudogene             |
| TOTAL   | 41 |     |                        |

### Delta-9 Desaturase Genes

An intricate system of communication is a distinct feature of social insects, indeed all social animals exhibit complex communicative behaviors through a variety methods and mediums. In social insects, colony recognition is an essential aspect of communication, which allows individuals to distinguish colony members from non-members in order to deter foreigners from entering another nest (73, 114, 115). In *L. humile* and other ant species, there is abundant evidence that colony recognition cues are largely based on cuticular hydrocarbons (CHC) (116-118). CHCs are produced by the queen and workers and can be influenced by the environment, resulting in a Gestalt odor for the colony (119).

Approximately 1,000 CHC compounds have been described in the 78 species of ants studied (120). Studies of CHC components in *D. melanogaster* show that carboxylases, elongases and desaturases each influence CHC biosynthesis (121). The desaturases (*desat1*, *desat2*, and *desatF* (syn. *Fad2*)), which are the best studied among these, insert carbon-carbon double bonds into *n*-alkanes to form monoenes and dienes (122, 123). These three desaturase genes have been shown to contribute to CHC alkene variability in *Drosophila* and affect mate recognition behavior (124). In *L. humile*, queens and workers produce variable amounts of four CHC alkenes (125), thus making the three *desaturase* genes, *D. melanogaster desat1*, *desat2*, and *desatF*, choice genome query candidates for determining genes for *L. humile* alkene synthesis.

For all three *D. melanogaster* *desat1*, *desat2*, and *desatF* query genes, we found the same thirty-three predicted desaturase genes/partial genes (Main Text, Figs. 3D and S15). These thirty-three  $\Delta 9$  desaturase genes were distributed across fifteen scaffold regions, with no more than four predicted genes grouping in one scaffold (Fig. S15). This arrangement appears to be somewhat similar to the distribution of the seven  $\Delta 9$  desaturase genes in *D. melanogaster*, although in *D.*

**Figure S15. Summary of desaturase gene annotations.** Arrangement of the sixteen  $\Delta 9$  desaturase genes and seventeen partial/fragmentary  $\Delta 9$  desaturase genes found in *L. humile*, which are dispersed among fifteen scaffolds of the genome (a.i-xv). The seven  $\Delta 9$  desaturase genes of *D. melanogaster* are also distributed across multiple regions, but are situated on one chromosome (b). Note the *D. melanogaster* chromosome is drawn to a different scale. Predicted genes are indicated by boxes with points representing direction of transcription and span of the genome, and are color coded according to the size of the gene model based on amino acid sequence length found. Asterisks next to *L. humile* gene names signify genes with EST evidence.

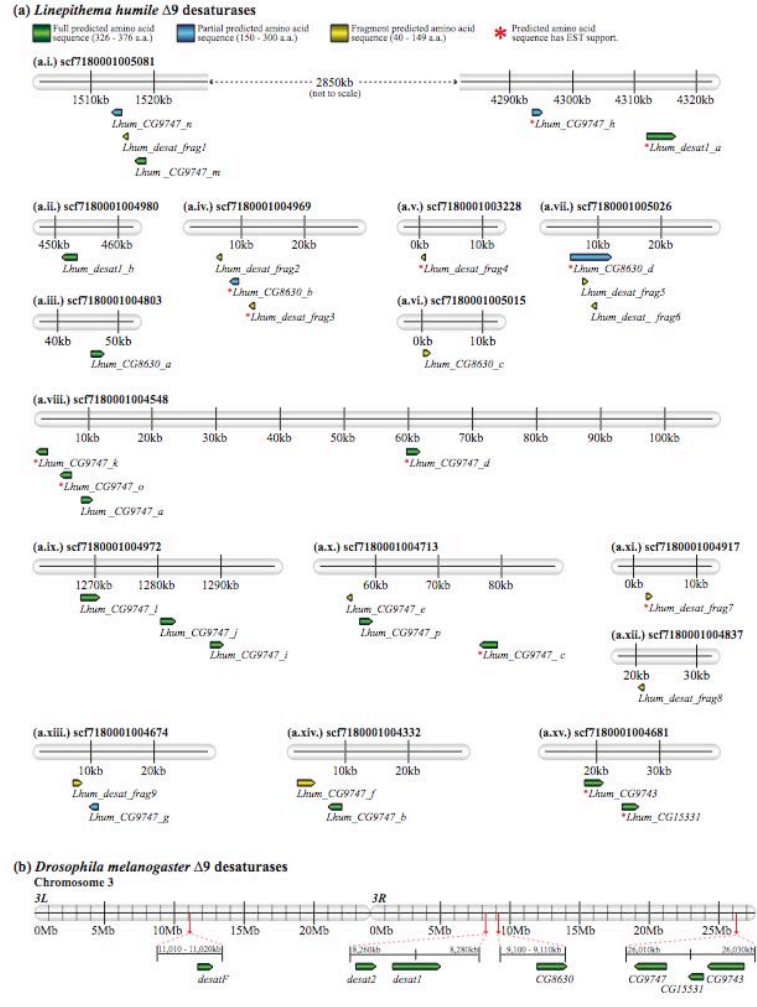

*melanogaster* they are all grouped on the third chromosome (Fig. S15). Reciprocal BLAST analyses of the *L. humile*  $\Delta 9$  desaturase genes against *D. melanogaster* found that eleven were most similar to the *D. melanogaster* *desat1* gene, twenty to the *D. melanogaster* gene CG9747, one to the *D. melanogaster* gene CG9743, one to the *D.*

*melanogaster* gene CG15531, and none were found to be most similar to *D. melanogaster desat2*, *desatF* or CG8630.

To better elucidate the relationships between the desaturase genes of *L. humile* and several other insects, we performed a phylogenetic analysis using most of the  $\Delta 9$  desaturase genes found in *L. humile* and six other insect taxa with completed genome sequences. Because of the relatively small size of the nine fragmentary  $\Delta 9$  genes in *L. humile*, these genes, as well as two partial *A. mellifera* desaturase genes, one similar to CG15531 and another to CG8630, were excluded from the analysis. Given this, the amino acid sequences of 85 homologous genes were aligned using the L-INS-i algorithm implemented in MAFFT v6 (12). Gblocks (126) was then used with low stringency parameter settings in order to eliminate positions that were poorly aligned. This resulted in a final trimmed dataset comprising 227 amino acid positions. CpREV+G, was found to be the best evolutionary model for the dataset as determined by ProtTest (127) according to the Akaike Information Criterion corrected for small sample size (we did not consider the LG model since it is not implemented in the phylogenetic software used). According to the best model, a maximum likelihood tree was reconstructed using RAxML v7.0.4 (128), and nodal support values were obtained by a 500-replicate rapid bootstrap analysis (BS).

Our phylogenetic analysis shows the existence of five major clades within the gene family of  $\Delta 9$  desaturases in insects (Fig. 3D). Two clades, clade D and clade E, are each strongly supported (BS=100) and are comprised of single-copy genes, although losses appear to have occurred in some lineages. Clade C, moderately supported (BS = 72), is distinguished by a gene expansion in *N. vitripennis*, but is absent in the aculeates,



*L. humile* and *A. mellifera*. Furthermore, since the respective gene is also missing in *D. melanogaster*, reciprocal BLAST searches based on this taxon incorrectly identify members of this clade as orthologs of various other *D. melanogaster* genes, which shows that this method alone can be misleading when evaluating homology relations. In clade B, all CG9747 desaturases form a well-supported (BS = 98) monophyletic group, which shows several gene expansion events in *L. humile* and *N. vitripennis*, and seem to have occurred both before and after the split of these lineages. Notably, *A. mellifera* genes are not found in this clade. The remainder of the  $\Delta 9$  desaturases are represented in clade A, a large and weakly supported (BS=50) group that is reduced in internal resolution and contains multiple genes in all represented taxa. However, it appears to be split into two sub-clades that include *D. melanogaster* CG8630 and *desatF* on the one hand, and *desat1* and *desat2* on the other. Homology relations between *L. humile* and *D. melanogaster* CG8630 and *desatF* cannot be identified reliably, and with the exception of two *A. pisum* and one *T. castaneum* gene, all other genes that are more closely related to CG8630 according to the phylogenetic reconstruction are deemed orthologous to *desat1* according to the best reciprocal BLAST criterion. For four *L. humile* genes this inconsistency also applies. Finally, two *L. humile* genes, *Lhum\_desat1\_a* and *Lhum\_desat1\_b*, can be considered orthologs of the *D. melanogaster desat1* according to both the phylogenetic and reciprocal BLAST analysis, and would be excellent candidate genes for experimental study of *L. humile* CHC alkenes.

## Cytochrome P450s

We deduced P450 amino acid sequences for *N. vitripennis*, *A. mellifera*, *D. melanogaster*, and *T. castaneum* (<http://drnelson.utm.edu/CytochromeP450.html>) and aligned the with *L. humile* P450s using CLUSTALW Version 2.0.10 (129) after removal of pseudogenes and sequences less than 50% complete. A neighbor joining tree was created using PHYLIP (Version 3.68) with 100 bootstrap replicates (Fig S13). Distances were corrected for multiple substitutions using TREE-PUZZLE Version 5.2 with the BLOSUM62 matrix as the model of substitution (107).

**Figure S13.** Neighbor-joining tree with four P450 clades highlighted and rooted with P450cam from *Pseudomonas putida*. All putatively functional P450 genes from *L. humile* (Lh, blue), *N. vitripennis* (Nv), *A. mellifera* (Am), *T. castaneum* (Tc), and *D. melanogaster* (Dm) are included as well as CYP3A4 and CYP2J2 from *Homo sapiens* (Hs). Species-specific gene radiations were collapsed into triangles with the number of P450s and family name listed. Nodes with greater than 50% support in 100 bootstrap replications is indicated (\*).

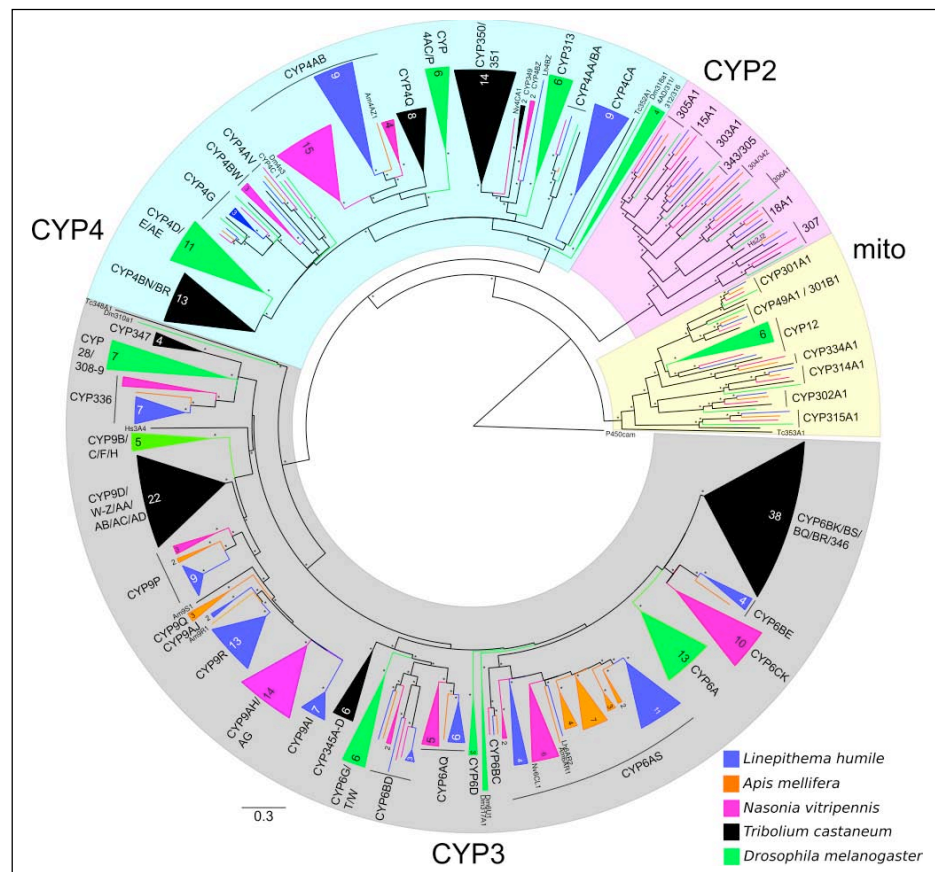

## **Hox genes**

Hox genes are homeodomain-containing transcription factors, very conserved in sequence and expression across arthropods and other animals (130). They play an important role in cell-fate determination and embryonic development, have been identified in all bilateral animal phyla examined to date and are known to determine the positional specification of the anterior-posterior axis (131). Mutations in Hox genes lead to transformations in body-segments and organ identities along this axis and are known as homeotic mutations. This homeotic capability is conserved among arthropods and vertebrates, which diverged more than 600 million years ago (131).

It is speculated that the Early Cambrian ancestor of present-day arthropod groups had a complex containing ten Hox genes (130), which are expressed in Hox-like patterns in chelicerates and myriapods. In the insects, however, homologs of *Hox3* (*zerknüllt* – *zen*, *zerknüllt2* – *zen2*, *bicoid* – *bcd*) and of *Hox6* (*fushi tarazu* – *ftz*) do not play a Hox-like role in determining segmental identity.

Hox genes are found in single clusters in a number of invertebrates including amphioxus, sea urchins, and several insects such as mosquitoes, beetles and locusts. In *D. melanogaster*, the cluster is divided in two sections. The Antennapedia Complex (ANT-C) contains genes required for the development of the mouth, head and thoracic segments – *labial* (*lab*), *proboscipedia* (*pb*), *deformed* (*dfd*), *Sex combs reduced* (*Scr*), and *Antennapedia* (*Antp*) –, and the genes in the Ultrabithorax Complex (BX-C), *Ultrabithorax* (*Ubx*), *Abdominal-A* (*abd-A*), and *Abdominal-B* (*abd-B*), are responsible for the development of the fly's abdomen and telson. These portions are separated by approximately 7.5Mb, and the split is thought to be fairly recent in origin. In addition to

the eight genes with traditional Hox-like function, *zen*, *zen2*, *bcd* and *ftz*, the *D. melanogaster* cluster also includes eight cuticle genes, five lysine tRNA genes, and *amalgam* (*Ama*, member of the immunoglobulin superfamily). All other insect genomes studied to date, e.g: *Anopheles gambiae*, *T. castaneum*, *A. mellifera* and *N. vitripennis*, have a contiguous cluster of Hox genes.

The *L. humile* genome has one single gene associated with each of the ten Hox groups of orthology mentioned above, constituting a single Hox cluster in which all transcription occurs in the same direction (Fig. S18; Table S2). The cluster is found in two separate scaffolds (7180001004429 and 7180001004972) of the current assembly. Because of this, it is difficult to assess whether the cluster has been divided in two complexes as it occurs in *D. melanogaster*, or remains a compact cluster of genes. Given that Hox genes are arranged in compact, single clusters in all other hymenopteran genomes studied to date (132) it is possible to assume that the *L. humile* cluster is also found as a single, compact group of genes. Further analyses are necessary to test this

**Figure S18.** *L. humile* HOX genes, compared to *D. melanogaster*, and *A. mellifera*. *L. humile* HOX genes, compared to *D. melanogaster*, and *A. mellifera*. Figure modeled after Dearden et al (2006). The complex spans approximately 0.8Mb (ruler for intergenic distances is not drawn to scale). \*The sequence of the *L. humile* Hox cluster is split across scaffolds 7180001004429 and 7180001004972.

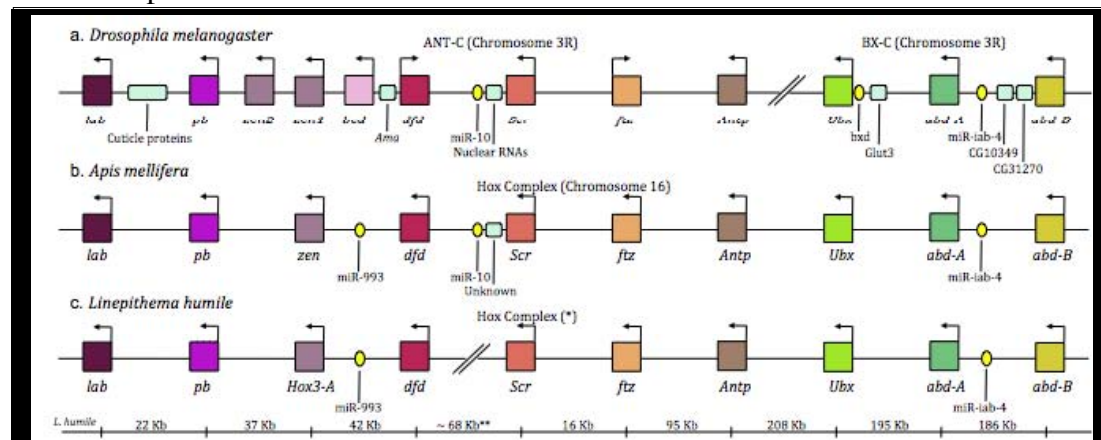

assumption.

We identified two microRNAs within the *L. humile* Hox cluster (Fig. S18). *miR-iab-4* is located in a conserved position compared to *A. mellifera* and *D. melanogaster* (132). The location of *miR-993* is conserved relative to *A. mellifera* and *N. vitripennis* (42) and has not been identified in other Arthropod Hox clusters. A third miRNA conserved throughout currently sequenced Hymenoptera, *mir-10* (42, 132) was not found within the *L. humile* cluster. This could be due to the fact that the current sequence assembly split the cluster in two different scaffolds in the area comprised between genes *dfd* and *Scr*, where *mir-10* is located in other insects where it has been described. No additional gene models were identified within the *L. humile* Hox cluster. The partition of the cluster onto two scaffolds also affects the estimated total size of the cluster. The distance from *Scr* to the end of scf7180001004429 is approximately 44Kb, and the distance from *dfd* to the end of scf7180001004972 is approx. 24Kb. Thus, the estimated distance between the two genes according to the current assembly is about 68Kb. We then estimate the total size of the *L. humile* cluster at approximately 0.8Mb, which is comparable to that of *D. melanogaster* and *T. castaneum* (approx. 0.7Mb), and about half the size of the clusters in the other two hymenopterans sequenced to date (1.68Mb for *N. vitripennis* and 1.37 Mb in *A. mellifera*). Intergenic distances are comparatively smaller than those of *N. vitripennis* and *A. mellifera* (132).

### **Immune response**

Insect humoral immune responses include several signaling pathways that produce effector proteins for the elimination of infectious microbes. Genome-wide characterization of insect immune genes has indicated that these pathways are conserved in most insects,

and differences between genomes stem from differences in gene family sizes (Table S16). For example, the honeybee and *Nasonia* have significantly fewer immune genes than *D. melanogaster* and *Anopheles gambiae* (42, 133-135). In honeybees this finding contrasts with the expectations since the characteristics of sociality (e.g. living in colonies and cooperation) presumably expose them to increased pathogen transmission. However, honeybees also have multitude of social defenses (136) and these may play a more important role than the innate immune responses (133).

**Table S16.** *L. humile* immune genes.

| Apis-blast | Droso-blast | Nasonia-blast | Other copies | ANNOTATED          | NOTE                                                              | Flybase ID/Apis ID   | Gene name in Drosophila/Apis               | Symbol        |
|------------|-------------|---------------|--------------|--------------------|-------------------------------------------------------------------|----------------------|--------------------------------------------|---------------|
| 1          |             |               |              | lhum_18w           |                                                                   | GB15177              | 18-wheeler                                 | 18-w          |
| 1          |             |               |              | lhum_armi          |                                                                   | Fbgn0041164          | armitage                                   | armi          |
|            | 1           |               |              | lhum_Ago2          |                                                                   |                      | Argonaute-2                                |               |
| 1          |             |               |              | lhum_aub           |                                                                   | Fbgn0000146          | aubergine                                  | aub           |
| 1          |             |               |              | lhum_Atg5          |                                                                   | Fbgn0029943          | Autophagy-specific gene 5                  | Atg5          |
| 1          |             |               |              | lhum_Atg7          |                                                                   | Fbgn0034366          | Autophagy-specific gene 7                  | Atg7          |
|            | 1           |               |              | lhum_Atg12         |                                                                   | Fbgn0036255          | Autophagy-specific gene 12                 | Atg12         |
| 1          |             |               |              | lhum_cactin        |                                                                   | Fbgn0031114          | cactin                                     | cactin        |
| 1          |             |               |              | lhum_cact1a        | CG:02184972                                                       | GB10655              | NF-kappa-B inhibitor cactus 1              | cact1a        |
|            |             |               | 1            | lhum_cact1b        | CG:02184980                                                       | GB10655              | NF-kappa-B inhibitor cactus 1              | cact1b        |
| 1          |             |               |              | lhum_casp          |                                                                   | Fbgn0034068          | caspar                                     | casp          |
|            | 1           |               |              | lhum_Dcr-2         |                                                                   | Fbgn0034246          | Dicer-2                                    | Dcr-2         |
|            | 1           |               |              | lhum_dredd         |                                                                   | Fbgn0020381          | death related ced-3/Nedd2-like protein     | Dredd         |
| 1          |             |               |              | lhum_def           |                                                                   | Fbgn0010385          | defensin                                   | Def           |
|            | 1           |               |              | lhum_dome          |                                                                   | Fbgn0043903          | domeless                                   | dome          |
| 1          |             |               |              | lhum_dl            |                                                                   | Fbgn0260632          | dorsal                                     | dl            |
| 1          |             |               |              | lhum_Duox          |                                                                   | Fbgn0031464          | dual oxidase                               | Duox          |
| 1          |             |               |              | lhum_egr           |                                                                   | Fbgn0033483          | eiger                                      | egr           |
|            | 1           |               |              | lhum_FADD          |                                                                   | Fbgn0038928          | FADD                                       | FADD          |
| 1          |             |               |              | lhum_galectin1     |                                                                   | GB10026              | Galectin 1                                 | galectin1     |
| 1          |             |               |              | lhum_galectin2     |                                                                   | GB18324              | Galectin 2                                 | galectin2     |
|            | 1           |               |              | lhum_galectin      |                                                                   | CG11372              | Galectin                                   | galectin      |
| 1          |             |               |              | lhum_GNBP1-1       | CG:02183786,                                                      | Fbgn0040323, GB19961 | Gram-negative bacteria-binding protein 1   | GNBP1-1       |
|            |             |               | 1            | lhum_GNBP1-2_like1 | shorter than others; no functional domain; still has EST support. | Fbgn0040323, GB19961 | Gram-negative bacteria-binding protein 1-2 | GNBP1-2_like1 |
| 1          |             |               |              | lhum_GNBP1-2       | CG:02183974                                                       | Fbgn0040323, GB19961 | Gram-negative bacteria-binding protein 1-2 | GNBP1-2       |
|            |             |               | 1            | lhum_GNBP1-        | shorter than                                                      | Fbgn0040323,         | Gram-negative                              | GNBP1-        |

|   |  |   |   |                    |                                                      |              |                                                    |              |
|---|--|---|---|--------------------|------------------------------------------------------|--------------|----------------------------------------------------|--------------|
|   |  |   |   | 2_like2            | others; no functional domain; still has EST support. | GB19961      | bacteria-binding protein 1-2                       | 2_like2      |
|   |  | 1 |   | lhum_Hisnavicin-3  |                                                      | XP_001607730 | Hisnavicin-3                                       | Hisnavicin-3 |
| 1 |  |   |   | lhum_hop           |                                                      | Fbgn0004864  | hopscotch                                          | hop          |
| 1 |  |   |   | lhum_hymenoptaecin |                                                      | GB17538-PA   | hymenoptaecin preproprotein                        | LOC406142    |
| 1 |  |   |   | lhum_imd           |                                                      | FBgn0013983  | immune deficiency                                  | imd          |
| 1 |  |   |   | lhum_Iap2          |                                                      | Fbgn0015247  | inhibitor of apoptosis 2                           | Iap2         |
| 1 |  |   |   | lhum_IKKgamma      | poor blast match                                     | GB17106-PA   | inhibitor of kappaB kinase gamma                   | IKKgamma     |
| 1 |  |   |   | lhum_bsk           |                                                      | GB16401-PA   | JNK MAP kinase basket                              | bsk          |
| 1 |  |   |   | lhum_Jra           |                                                      | GB12004-PA   | Jun-related antigen                                | Jra          |
| 1 |  |   |   | lhum_kay           |                                                      | Fbgn0001297  | kayak                                              | kay          |
| 1 |  |   |   | lhum_Lys-3         |                                                      | GB19988-PA   | Lysozyme 3                                         | Lys-3        |
| 1 |  |   |   | lhum_Lys-2         |                                                      | GB15106      | Lysozyme-2                                         | Lys-2        |
| 1 |  |   |   | lhum_MyD88         | CG:02184700                                          | GB12344-PA   | myeloid differentiation primary response factor 88 | Myd88        |
| 1 |  |   |   | lhum_Rel           |                                                      | GB13742-PA   | NF-kappaB transcription factor relish              | Rel          |
|   |  | 1 |   | lhum_Naickin-1     |                                                      | XP_001600083 | Naickin-1                                          | Naickin-1    |
|   |  | 1 |   | lhum_Naickin-2a    |                                                      | XP_001599718 | Naickin-2                                          | Naickin-2a   |
|   |  |   | 1 | lhum_Naickin-2b    |                                                      | XP_001599718 | Naickin-2                                          | Naickin-2b   |
| 1 |  |   |   | lhum_NimA          |                                                      | GB12883-PA   | nimrod A                                           | NimA         |
| 1 |  |   |   | lhum_Atg7          |                                                      | FBgn0034366  | Autophagy-specific gene 7                          | Atg7         |
| 1 |  |   |   | lhum_NimC          |                                                      | GB14645-PA   | nimrod C1                                          | NimC1        |
| 1 |  |   |   | lhum_NOS           |                                                      | GB18010-PA   | nitric oxide synthase                              | NOS          |
| 1 |  |   |   | lhum_Pli           |                                                      | Fbgn0025574  | Pellino                                            | Pli          |
| 1 |  |   |   | lhum_PGRP-LC       |                                                      | GB17188-PA   | Peptidoglycan recognition protein LC               | PGRP-LC      |
| 1 |  |   |   | lhum_PGRP-S2a      |                                                      | GB19301      | peptidoglycan recognition protein S2               | PGRP-S2a     |
|   |  |   | 1 | lhum_PGRP-S2b      |                                                      | GB19301      | peptidoglycan recognition protein S2               | PGRP-S2b     |
| 1 |  |   |   | lhum_PGRP-S1       |                                                      | GB15371      | peptidoglycan recognition protein S1               | PGRP-S1      |
|   |  |   | 1 | lhum_PGRP-LC_like  |                                                      | GB17188-PA   | peptidoglycan-recognition protein LC               | PGRP-LC_like |
| 1 |  |   |   | lhum_PGRP-SA       |                                                      | GB17879-PA   | peptidoglycan-recognition protein SA               | PGRP-SA      |
| 1 |  |   |   | lhum_PPO           |                                                      | GB18313-PA   | prophenoloxidase                                   | PPO          |
| 1 |  |   |   | lhum_Rpn3          |                                                      | GB12827-PA   | regulatory particle non-ATPase 3                   | Rpn3         |
| 1 |  |   |   | lhum_SCR-B10       |                                                      | GB19683      | scavenger receptor class B, type 10                | SCR-B10      |
| 1 |  |   |   | lhum_SCR-B2        |                                                      | GB11743-PA   | scavenger receptor class B, type 2                 | SCR-B2       |
| 1 |  |   |   | lhum_SCR-B5        |                                                      | GB13813-PA   | scavenger receptor class B, type 5                 | SCR-B5       |
| 1 |  |   |   | lhum_SCR-B9        |                                                      | GB19916      | scavenger receptor class B, type 9                 | SCR-B9       |
| 1 |  |   |   | lhum_SCR-C         | Missing 5'                                           | GB19925-PA   | scavenger receptor                                 | SCR-C        |

|    |   |   |    |                   |                |             |                                                                 |              |
|----|---|---|----|-------------------|----------------|-------------|-----------------------------------------------------------------|--------------|
|    |   |   |    |                   | end            |             | class C                                                         |              |
| 1  |   |   |    | lhum_SP14         |                | GB14044-PA  | serine protease 14                                              | SP14         |
| 1  |   |   |    | lhum_SP1b         |                | GB16147     | serine protease 1                                               | SP1          |
|    |   |   | 1  | lhum_SP1a         |                | GB16147     | serine protease 1                                               | SP1          |
| 1  |   |   |    | lhum_SP2          |                | GB14247     | serine protease 2                                               | SP2          |
| 1  |   |   |    | lhum_SP30         |                | GB19649-PA  | serine protease 30                                              | SP30         |
| 1  |   |   |    | lhum_SP46         |                | GB16367-PA  | serine protease 46                                              | SP46         |
| 1  |   |   |    | lhum_SP49         |                | GB15317-PA  | serine protease 49                                              | SP49         |
| 1  |   |   |    | lhum_Serpin-1     |                | GB17012-PA  | serine protease inhibitor 1                                     | serpin-1     |
| 1  |   |   |    | lhum_Serpin-3     |                | GB30307-PA  | serine protease inhibitor 3                                     | Serpin-3     |
| 1  |   |   |    | lhum_Serpin-5     |                | GB19582-PA  | serine protease inhibitor 5                                     | serpin-5     |
|    | 1 |   |    | lhum_Serpin-4     |                | Fbgn0028985 | serine protease inhibitor 4                                     | serpin-4     |
| 1  |   |   |    | lhum_pll          |                | GB16397-PA  | serine/threonine-protein kinase pelle                           | pll          |
| 1  |   |   |    | lhum_Stat92E      |                | Fbgn0016917 | Signal-transducer and activator of transcription protein at 92E | Stat92E      |
|    |   | 1 |    | lhum_spz1         |                | Fbgn0003495 | Spatzle 1                                                       | spz1         |
|    |   |   |    | lhum_spz2         |                | Fbgn0261526 | Spatzle 2                                                       | spz2         |
|    |   |   |    | lhum_spz4         |                | Fbgn0032362 | Spatzle 4                                                       | spz4         |
|    |   |   |    | lhum_spz5         |                | Fbgn0035379 | Spatzle 5                                                       | spz5         |
|    |   |   |    | lhum_spz6         |                | Fbgn0035056 | Spatzle 6                                                       | spz6         |
| 1  |   |   |    | lhum_Tab2         |                | Fbgn0086358 | Tak1-associated binding protein 2                               | Tab2         |
| 1  |   |   |    | lhum_Tak1         |                | GB14664     | TGF-beta activated kinase 1                                     | Tak1         |
| 1  |   |   |    | lhum_TepIII       |                | Fbgn0041181 | thiolester containing protein III                               | TepIII       |
| 1  |   |   |    | lhum_TEP7         |                | GB12605-PA  | thiolester-containing protein 7                                 | TEP7         |
| 1  |   |   |    | lhum_TEPA         |                | GB18789-PA  | thiolester-containing protein A                                 | TEPA         |
| 1  |   |   |    | lhum_Traf6        |                | GB10539-PA  | TNF-receptor-associated factor 6                                | Traf6        |
| 1  |   |   |    | lhum_Traf1        |                | GB10394     | TNF-receptor-associated factor 1                                | Traf1        |
| 1  |   |   |    | lhum_Toll-1a      |                | GB18520     | toll like receptor 1                                            | Toll-1a      |
|    |   |   | 1  | lhum_Toll-1b      |                | GB18520     | toll like receptor 1                                            | Toll-1b      |
|    |   |   | 1  | lhum_Toll-1_like1 | no start codon | GB18520     | toll like receptor 1                                            | Toll-1_like1 |
|    |   |   | 1  | lhum_Toll-1_like2 |                | GB18520     | toll like receptor 1                                            | Toll-1_like2 |
|    |   |   | 1  | lhum_Toll-1d      |                | GB18520     | toll like receptor 1                                            | Toll-1d      |
| 1  |   |   |    | lhum_Toll-10      |                | GB16299     | toll like receptor 10                                           | Toll-10      |
| 1  |   |   |    | lhum_Toll-6       |                | GB17781     | toll like receptor 6                                            | Toll-6       |
| 1  |   |   |    | lhum_Toll-8       |                | GB10640-PA  | toll like receptor 8                                            | Toll-8       |
| 1  |   |   |    | lhum_tub          |                | Fbgn0003882 | tube                                                            | tub          |
| 67 | 8 | 4 | 11 |                   |                |             |                                                                 |              |
|    |   |   |    | lhum_GNBP         | Pseudogene?    |             |                                                                 |              |
|    |   |   |    | lhum_Toll-1       | Pseudogene?    |             |                                                                 |              |

## Opsins

Opsins are transmembrane, G-protein coupled receptors that, when coupled with a chromophore, form visual pigments. In insects, the number of opsin genes varies from



two, in *Tribolium*, to seven, in *D. melanogaster*, and in some cases the number of opsins has evolved in tandem with distinctive wing coloration. Although Argentine ants are less visually-oriented foragers than honeybees, they have still retained the same four visual opsins that are present in the honeybee genome: *ultraviolet*, *blue*, *long wavelength opsin 1* and *long wavelength opsin 2* (Table S2). The Argentine ant genome also contains a *pteropsin*-like non-visual opsin, as has been reported for *A. mellifera*.

### **Behavior**

The unusual unicolonial social structure of introduced Argentine ant populations has made them an attractive model system for studies of colonymate recognition and social behaviors. We manually annotated >75 genes associated with important behaviors that are related to Argentine ant sociality, including genes implicated in learning, memory, aggression, and circadian cycles. The ability to distinguish between colonymates and ants from foreign colonies requires the production of colony-specific labels, the ability to recognize these labels, and elements of learning and memory.

Learning and memory. Many animals possess the ability to gain and process information about the environment (learning) and store and retrieve information over time (memory). Insects, in particular, often rely on olfaction for a variety of behaviors such as foraging, mating, and predator avoidance (137-139). Candidate genes implicated in learning and memory have been most well studied in *Drosophila*, and this functional group includes a diverse array of genes, including some involved in neurotransmitter production (140-142), cell adhesion molecules (143, 144), cAMP signaling cascade molecules (145, 146), CaMKII proteins (147-149), and RNA transport and translation molecules (150).

*Drosophila melanogaster* and *A. mellifera* have been well studied in the last four decades, becoming widely used models for studying olfactory learning and memory. The learning and memory functional group is composed genes that when absent or altered are known to affect learning and memory.

Most of the insect genes that have been implicated in olfactory learning and memory have been described and studied in *D. melanogaster*. We selected genes for annotation based on the gene ontology terms "learning or memory" in *D. melanogaster*. We found 106 genes, investigated the 69 genes with annotation records in other species, and manually annotated the 59 found in Argentine ants (Table S2). Only two of these genes were found in *L. humile*, but not *N. vitripennis* or *A. mellifera*. Social insects, like *L. humile*, rely heavily on olfactory learning and memory for activities such as nest mate recognition. This data set will provide a rich resource for further studies in learning and memory within ant species.

Aggression. As with most ants, nestmate recognition in Argentine ants has often been studied by examining the behavior of workers towards non-colonimates (151-153). Aggression involves the direct action, interaction and regulation of several genes that results in a complex behavioral phenotype.

Several studies on the genetics of aggression in mammals and invertebrates have focused on bioamines, major chemical substances involved in the neurobiology of animals that appear to have clear effects on the aggression (154, 155). However, recent studies in *D. melanogaster* suggest that genes involved in basic biological and molecular functions also play a role in aggression (156-158). These include genes involved in

processes such as cell communication, metabolic processes and electron transport. While the role of these genes in aggression have been discovered in the context of intraspecific male aggression in *D. melanogaster*, similar gene categories have also been implicated in the honey bee colony defense (159). Moreover, some of the genes involved in aggressive behavior in fruit flies appear to have evolutionary conserved orthologous also found in humans (160).

Animals display both intraspecific and interspecific aggression in a variety of different contexts. Aggression is particularly common in ants, often because colonies must defend local resources from neighboring ant colonies. We identified five genes in *L. humile* that are similar to those associated with interspecific male aggression in *D. melanogaster* including *ade5*, *eclair*, *echinoid*, *no ocelli*, and *sugarless* (Table S2). The ontology of these genes varies from cell communication and intracellular protein transport to sensory organ development. Additionally, all five of these genes appear to have pleiotropic effects on other male *D. melanogaster* phenotypes including number of sensory bristles, sleep patterns, and starvation stress resistance (158). All five aggression genes in *L. humile* had significant matches to *A. mellifera* indicating possible orthology while only two such gene similarities were found in *N. vitripennis*.

Circadian rhythms. In insects, daily cycles of activity are controlled by one of three different transcriptional regulation systems: those governed by the expression of *cryptochrome 1 (cry1)*, those driven by the expression of *cryptochrome 2 (cry2)*, and those in which both *cry1* and *cry2* are present. Butterflies and mosquitoes possess both *cry1* and *cry2*; *Drosophila* only has *cry1*. Unlike many other insects, *L. humile* does not

exhibit a strong daily activity pattern. Instead, workers typically forage during both the day and night, often along enormous foraging trails. Argentine ants, like *Apis* and *Tribolium*, do not possess a copy of the *cryI* gene (Table S2).

Model for human disease. Insect models, particularly *D. melanogaster*, have been invaluable systems for studies of human processes and diseases. Recent studies suggest that social insects may also prove to be useful for as model systems for some human diseases. *A. mellifera*, for example, exhibits a behavioral response to cocaine that is similar to that of humans (161), raising the intriguing possibility that ant genomes could be also be a useful invertebrate models of

human behavioral diseases. Indeed, our KEGG and OrthoMCL analysis of the *L. humile* genome identified over 1400 genes involved in over 30 pathways implicated in human diseases ranging from diabetes, to multiple cancers, to neurological disorders such as Alzheimer's, Parkinson's disease, and William's Beuren Syndrome (Table S5).

**Yellow/Major royal jelly proteins**  
To identify and retrieve genes belonging to the yellow and major

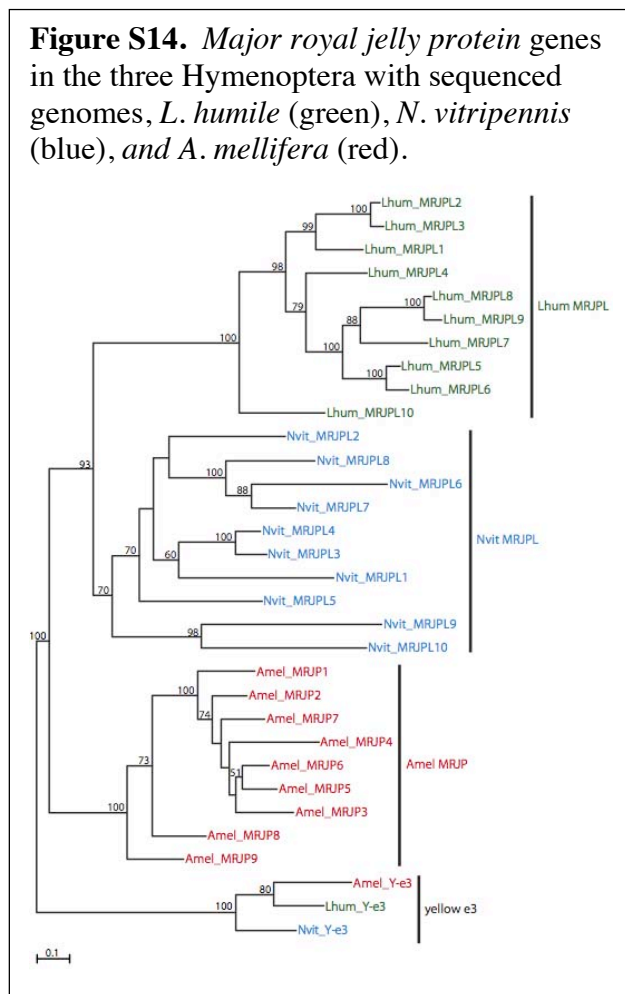

royal jelly protein (MRJP) gene family in *L. humile*, we employed a standardized BLAST strategy. The members of the focal gene family in *D. melanogaster* were selected from FlyBase (<http://flybase.org>) and served as reference genes; in the case of the major royal jelly protein and major royal jelly protein-like genes, reference sequences were retrieved from the *A. mellifera* and *N. vitripennis* assemblies of the Hymenopteran Genome Database (<http://genomes.arc.georgetown.edu/drupal/>). The BLAST package (133) was then used to identify regions and gene models from the *L. humile* OGS v1.1 produced by MAKER.

To understand the evolutionary history and homology relations of the yellow/MRJP gene family in the Argentine ant, we performed two phylogenetic analyses: The first analysis included all yellow and MRJP genes of the focal taxa mentioned above and *Tribolium castaneum*. The amino acid sequences of these 94 genes were aligned with MAFFT v6 and the L-INS-i algorithm (30). Positions that were aligned ambiguously were removed using Gblocks (96) with low stringency parameters. This resulted in a final dataset containing 169 amino acid positions. The evolutionary model with the best fit to this dataset, LG+G, was determined by ProtTest (97) according to the Akaike Information Criterion corrected for small sample size. Based on this model, a maximum likelihood tree was reconstructed using RAxML version 7.2.6 (98). Nodal support values were obtained by the rapid bootstrap algorithm as implemented in RAxML (500 replicates). A yellow gene from the bacterium *Dienococcus radiodurans* was used as the outgroup for the analysis.

The maximum likelihood tree of this analysis reveals six clades, here termed yellow g and g2, yellow x1, yellow core group (b/c/f/h/y), yellow e, yellow

e3/x2 and MRJP (includes MRJP-like) (Fig. 3 C). Several of these clades provide strong support for orthologous relationships between *L. humile* genes and those of similarly named genes from the other four focal taxa (see clades yellow g and g2, x1, e, and e3/x2, Fig. 3C). The yellow core group (named because it contains the originally described *yellow-y* of *D. melanogaster*) contains well-supported yellow b and y groups but the relationships of the *yellow-h*, *-c*, and *-f* genes are less resolved in this analysis.

The second analysis focused exclusively on the 29 members of the MRJP gene subfamily retrieved from the hymenopteran taxa, as well as 3 hymenopteran *yellow-e3* genes which comprised the outgroup (Fig. S14). Except for the alignment algorithm, which was E-INS-i, the same methods were used as described above. After removing ambiguously aligned positions, the dataset encompassed 284 positions, which indicates that a larger amount of informative sites were retained due to decreased sequence diversity in the dataset. Consequently, higher confidence values support this tree, which is topologically identical to the comprehensive tree with respect to the MRJP gene subfamily. The topology strongly indicates that the radiation of the MRJP genes in each taxon took place after the evolutionary split of their respective lineages (see main text). Except for the production of royal jelly in *Apis*, the functions of these genes are unknown but may share similarities between *Nasonia*, *Apis* and *L. humile* and may have evolved in response to similar selective pressures.

### **Insulin signaling**

The insulin signaling pathway is highly conserved among animals and is a major regulator of growth, reproduction, and aging (162). In *A. mellifera*, it is also known to be involved in developmental differentiation of the queen and worker castes (163-167).

Appropriate allocation of carbohydrates to lipids is an important process in social insects as stored lipids are a stored “communal resource” that can be tapped into if incoming food supplies decrease (168). Ants with high carbohydrate intake, such as those feeding on homopteran honeydew, may face challenges in coping with such high carbohydrate intake. Interestingly, introduced populations of *L. humile* commonly tend Homoptera, and thus occupy a lower trophic position than the more carnivorous populations in the native range (169), suggesting that there may be associated differences in insulin signaling between the two ranges.

We annotated a complete and apparently functional insulin signaling pathway (22 genes annotated) in the Argentine ant (Table S2). Initiation of cell growth is likely induced by this pathway, with the detection of growth factor receptors by the *Pi3K* complex (*Lhum\_Pi3K21B*, *Lhum\_Pi3K59F*, *Lhum\_Pi3K68D*, and *Lhum\_Pi3K92E*) which activates *PDK-1* and *AKT* (*Lhum\_PDK1*; *Lhum\_AKT*). *AKT* can then phosphorylate *mTor* (*Lhum\_TOR*), which in turn can phosphorylate *4EBP* (*Lhum\_4EBP*), leading to the downstream activation of *EIF-4B* (*Lhum EIF4B*) and *RPS6* (*Lhum\_RPS6*). This can result in the initiation of translation and contributes to overall cell growth. Most of the proteins in this pathway are highly conserved and have only minor variation compared to even mammalian orthologs (e.g., *target of rapamycin*, *Lhum\_Tor*, has 61% identity to its ortholog in humans, *mTor*, across 2538 amino acid positions). The general exceptions to sequence conservation are the insulin-like peptides (*Iip*, also referred to as insulin related peptides, *Irp*), which are short, ~100 a.a., and have few highly conserved residues (162). Furthermore, the number of insulin-like peptides varies across taxa; *Drosophila melanogaster* has seven *Iip* genes while *A. mellifera* only two (one of which

is described as an Insulin-like growth factor peptide, *Igf*). Similarly, the number of insulin receptor genes (*InR*) varies across taxa, with *D. melanogaster* having only one while *A. mellifera* two. In *L. humile* we found two *Ilp* and two *InR* genes. One of the *L. humile* insulin peptides is more similar to typical insect *Ilp* (*Lhum\_Ilp1*) while the other to insulin growth factor (*Lhum\_Ilp2*). A search of the *Lhum\_InR1-2* predicted proteins in NCBI is similarly complicated with hits of both insulin receptors and insulin-like growth factor receptors. Thus, it is currently unclear whether there is a one to one relationship of the peptides and receptors, and in mammals both peptides bind to both receptors, but with differing affinities.

### **Relative Evolutionary Rates Analysis**

To analyze the rate of evolution of *L. humile*, we compared the amino acid composition of Argentine ant OGS1.1 proteins and their predicted orthologs in *Apis mellifera*, *Nasonia vitripennis*, and *Drosophila melanogaster*. Evolutionary comparisons between distantly related species can be skewed if more than one mutation, on average, occurs per synonymous codon site. Since Diptera and Hymenoptera are separated by >300MYA, we focused on non-synonymous substitutions in highly conserved regions of orthologous proteins.

Predicted orthologs were identified with OrthoMCL (53) to group annotated proteins into putative orthologous sets. Each set was required to have a single gene copy from each species with no species being unrepresented in the set. Proteins from of each set were aligned to each other using Clustalw (170) and further processed using Gblocks (126) to extract only conserved blocks found in all four species. The final alignments were measured to estimate the distribution of amino acid substitution rates. We then



concatenated the multiple alignments from each orthologous set together to estimate the average substitution rate for the coding portion of the genome using the program PROML (<http://evolution.genetics.washington.edu/phyml.html>). PROML was constrained by the tree topology corresponding to the known phylogenetic relationship of the species studied. Branch lengths were allowed to vary to best fit the multiple alignments to the constrained tree topology. The branch lengths produced by PROML are proportional to the expected amino acid substitutions, and provides a simple means to calculate the substitution rates between different nodes of the tree. Each tree was rooted using *D. melanogaster* as the out-group, which allowed us to calculate the number of amino acid substitutions per site occurring in the remaining three species relative to their last shared common ancestor (Figure S19).

**Figure S19.** A tree of the phylogenetic relationships for different species of insects related to *L. humile*. Amino acid substitution rates in orthologous proteins were estimated for organisms in the orange box (A). The average number of amino acid substitutions estimated to have occurred per site in a concatenated, multiple sequence alignment of orthologous proteins compared to the last common ancestor of the organisms from (A) and *D. melanogaster* is shown (B). The distribution of substitution rates for all orthologous protein sets when calculated independently, rather than as part of the concatenated alignments are indicated for *L. humile* (red), *N. vitripennis* (green), and *A. mellifera* (blue) (C).

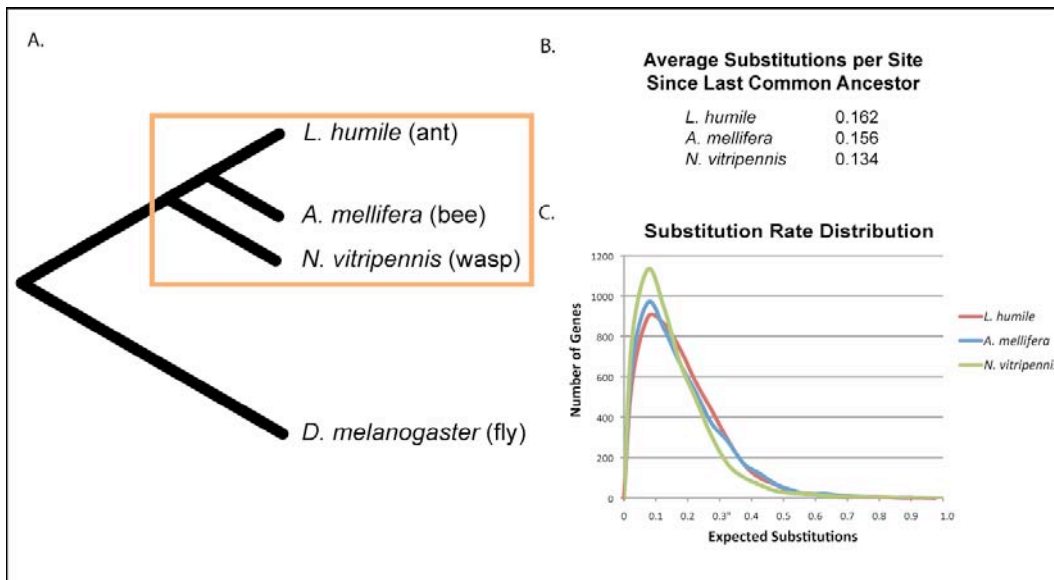

### Foraging Gene qPCR

The resources presented here will accelerate and facilitate molecular studies of Argentine ants. Using the transcriptome and genomic data presented here, we annotated the *foraging* gene (LH17994/LH24060), designed primers for quantitative PCR, and quantified expression levels of this gene across several developmental stages.

Using the *L. humile* transcriptome dataset we matched contigs to the *foraging* gene sequence of *D. melanogaster*, *A. mellifera*, *N. vitripennis*, and *P. barbatus*. We selected primers using Primer3 (171) then purchased them from Elim Biopharmaceuticals, Inc. (Hayward, CA). We extracted RNA from workers, larvae and

pupae raised in the lab and gathered in the field using Qiagen RNeasy Mini kit (Catalog #74104). Residual DNA was removed using Turbo DNase from Ambion (AM2238). cDNA was made using the Invitrogen SuperScript III First-Strand Synthesis System for RT-PCR kit (Catalog Number 18080-051) using oligo d(T).

Quantitative reverse-transcriptase real-time PCR was performed using the Invitrogen kit, SYBR GreenER qPCR SuperMix Universal (Catalog number 11762-100). Each sample was diluted to contain the same volume of starting RNA and run in triplicate. The average of the CT value as well as the standard deviations were calculated. The housekeeping gene *glyceraldehyde 3-phosphate dehydrogenase* (GAPDH) was used as the reference gene and the primers were tailored to the Argentine ant by using the EST dataset.

During the larval stage, expression is similar to that of the workers however, the pupae stage increases almost 6 fold higher than both the larval and worker stages (Fig. S20). We standardized all of the data to values obtained from samples of workers giving the following results for fold change: 1, 6.39, 2.23 for worker, pupae and larvae, respectively. The following results are fold changes for field samples: 1, 6.14, 1.39 for worker, pupae and larvae, respectively. The fold changes for lab samples: 1, 6.68, 2.00 for worker pupae and larvae, respectively. Our data compares gene expression of a section of the 3' end of the *foraging* gene in developmental stages of the Argentine ant. We looked at larvae, pupae, and workers. We compared samples that were taken directly from the field and samples that had been reared in the laboratory colonies to confirm that there is no variation in gene expression between these two environments (Fig. S20). We used *GAPDH* as a control gene for every sample taken to insure uniformity across

samples and no contaminants or variants were present. There is no significant difference between field and lab samples, with only a slight increase in expression of the *foraging* gene in the field samples (Fig. S20). In comparison to other organisms we see that expression increasing in developmental stages but in the harvester ant regulation is down regulated. Importantly, the harvester ant data was taken only from callows and workers while our data was taken from early developmental stages (larvae and pupae) as well as workers. The differences seen in regulation of the *foraging* gene between these two organisms could be due to the limited developmental stages tested.

**Figure S20.** Quantitative PCR data of the *foraging* gene. A comparison between larva, pupae, and adult workers from lab and field samples. Results are normalized to worker expression, which is set at 1.

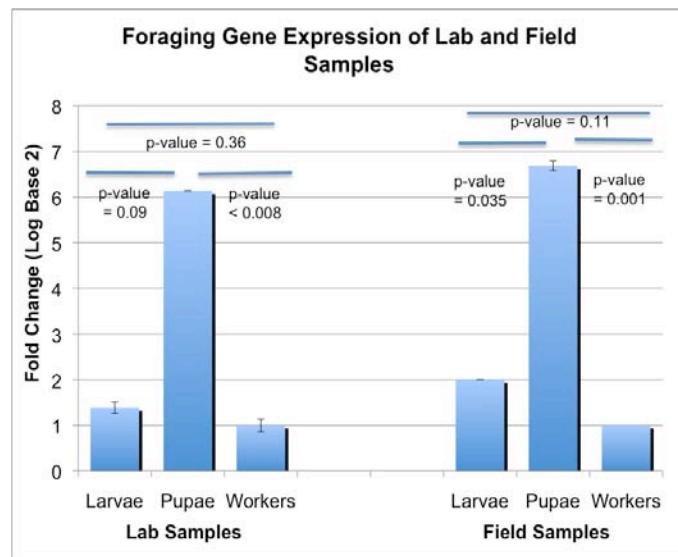

### Annotation of the *L. humile* genome as a teaching tool

The undergraduate Evolutionary Genomics class at Earlham College (students: H. Albers, M. Bahnick, T. Carter, K. Clay, P. Hallowell, J. Hood, S. McGuire, A. Miller, M. Naughton, K. O'Rourke-Owens, K. Paine, J. Pillow, P. Raines, and C. Wertman) used the *L. humile* genome as a tool for students to learn gene structure, orthology, and annotation. Each student in the class chose five genes to annotate. The choice of genes varied from those involved in basic cellular processes (e.g., the cell cycle) to heat shock proteins, but

was entirely student driven. More than 50 genes were annotated by the class. After selecting their genes, students researched the literature on the genes and found gene models in insects (principally *D. melanogaster* and *A. mellifera*). Students identified the location of genes in the *L. humile* genome, and used basic BLAST tools to assess whether the *ab initio* gene predictors used by Maker had computationally predicted a gene. Using all available evidence the students reviewed the gene models and, in the process, learned basic elements of gene structure (intron/exon boundaries, conserved domains, etc.) and the process of refining gene models. As a quality control step, the students turned in their revised gene model and detailed evidence for any changes they made to the *ab initio* prediction; once approved the students uploaded their revisions to the genome server. At the conclusion of the course students responded very positively (4.7 on a 1-5 scale) in a survey about how influential working on a real, unpublished genome was in the material learned in the course.

### **ACKNOWLEDGEMENTS**

We thank G. Anderson for providing the ants used in this project, A. Smith for assistance with transcriptome sequencing, L. Tonkin and the V. Coates Genomic Sequencing Facility (UC Berkeley) and the Center for High Performance Computing (University of Utah) for assistance and use of facilities, G. Robinson for support, M. Wong for script support, M. Goodisman for valuable discussion, B. Hunt and S. Yi for generously sharing useful data, and B. Moore for assistance with SNP analysis. Infrastructure for this work was supported in part by NHGRI NIH grant 1R01HG004694 (MY) , NIMH NIH grant 5SC2MH086071 (CDS) and the UIUC Romano Professorial Scholarship (HMR).

## REFERENCES

1. van Wilgenburg E, Torres CW, & Tsutsui ND (2010) The global expansion of a single ant supercolony. *Evolutionary Applications* 3(2):136-143.
2. Krieger MJB & Keller L (1997) Polymorphism at dinucleotide microsatellite loci in fire ant *Solenopsis invicta* populations. *Molecular Ecology* 6:997-999.
3. Suarez AV, Tsutsui ND, Holway DA, & Case TJ (1999) Behavioral and genetic differentiation between native and introduced populations of the Argentine ant. *Biological Invasions* 1(1):43-53.
4. Tsutsui ND, Suarez AV, Holway DA, & Case TJ (2000) Reduced genetic variation and the success of an invasive species. *Proceedings of the National Academy of Sciences of the United States of America* 97(11):5948-5953.
5. Nei M (1987) *Molecular evolutionary genetics* (Columbia University Press, New York).
6. Suarez AV, Holway DA, Liang D, Tsutsui ND, & Case TJ (2002) Spatiotemporal patterns of intraspecific aggression in the invasive Argentine ant. *Animal Behaviour* 64:697-708.
7. Miller JR, *et al.* (2008) Aggressive assembly of pyrosequencing reads with mates. *Bioinformatics* 24(24):2818-2824.
8. Cantarel BL, *et al.* (2008) MAKER: An easy-to-use annotation pipeline designed for emerging model organism genomes. *Genome Res* 18(1):188-196.
9. Edgar RC & Myers EW (2005) PILER: identification and classification of genomic repeats. *Bioinformatics* 21 Suppl 1:i152-158.
10. Korf I, Yandell M, & Bedell J (2003) BLAST (O'Reilly Media, Sebastopol, CA) p 368.
11. Slater GS & Birney E (2005) Automated generation of heuristics for biological sequence comparison. *Bmc Bioinformatics* 6:31.
12. Benson DA, Karsch-Mizrachi I, Lipman DJ, Ostell J, & Wheeler DL (2005) GenBank. *Nucleic Acids Res* 33(Database issue):D34-38.
13. Anonymous (The Universal Protein Resource (UniProt) in 2010. *Nucleic Acids Res* 38(Database issue):D142-148.
14. Korf I (2004) Gene finding in novel genomes. *Bmc Bioinformatics* 5:-.
15. Stanke M, Tzvetkova A, & Morgenstern B (2006) AUGUSTUS at EGASP: using EST, protein and genomic alignments for improved gene prediction in the human genome. *Genome Biol* 7 Suppl 1:S11 11-18.
16. Lukashin AV & Borodovsky M (1998) GeneMark.hmm: new solutions for gene finding. *Nucleic Acids Res* 26(4):1107-1115.
17. Eilbeck K, Moore B, Holt C, & Yandell M (2009) Quantitative measures for the management and comparison of annotated genomes. *Bmc Bioinformatics* 10:67.
18. Quevillon E, *et al.* (2005) InterProScan: protein domains identifier. *Nucleic Acids Research* 33:W116-W120.
19. Smith CD, *et al.* (2007) Improved repeat identification and masking in Dipteras. *Gene* 389(1):1-9.
20. Mungall CJ & Emmert DB (2007) A Chado case study: an ontology-based modular schema for representing genome-associated biological information. *Bioinformatics* 23(13):i337-346.

21. Lewis SE, *et al.* (2002) Apollo: a sequence annotation editor. *Genome Biol* 3(12):RESEARCH0082.
22. Waterhouse AM, Procter JB, Martin DM, Clamp M, & Barton GJ (2009) Jalview Version 2--a multiple sequence alignment editor and analysis workbench. *Bioinformatics* 25(9):1189-1191.
23. Ryter JM & Schultz SC (1998) Molecular basis of double-stranded RNA-protein interactions: structure of a dsRNA-binding domain complexed with dsRNA. *Embo J* 17(24):7505-7513.
24. Kenmochi N, *et al.* (1998) A map of 75 human ribosomal protein genes. *Genome Res* 8(5):509-523.
25. Brodersen DE & Nissen P (2005) The social life of ribosomal proteins. *Febs J* 272(9):2098-2108.
26. Sengupta J, *et al.* (2004) Identification of the versatile scaffold protein RACK1 on the eukaryotic ribosome by cryo-EM. *Nat Struct Mol Biol* 11(10):957-962.
27. Nilsson J, Sengupta J, Frank J, & Nissen P (2004) Regulation of eukaryotic translation by the RACK1 protein: a platform for signalling molecules on the ribosome. *EMBO Rep* 5(12):1137-1141.
28. Wool IG, Chan YL, & Gluck A (1995) Structure and evolution of mammalian ribosomal proteins. *Biochem Cell Biol* 73(11-12):933-947.
29. Marygold SJ, *et al.* (2007) The ribosomal protein genes and minute loci of *Drosophila melanogaster*. *Genome Biol* 8(10):R216.
30. Zhang Z, Harrison P, & Gerstein M (2002) Identification and analysis of over 2000 ribosomal protein pseudogenes in the human genome. *Genome Res* 12(10):1466-1482.
31. Uechi T, Tanaka T, & Kenmochi N (2001) A complete map of the human ribosomal protein genes: assignment of 80 genes to the cytogenetic map and implications for human disorders. *Genomics* 72(3):223-230.
32. Katoh K, Misawa K, Kuma K, & Miyata T (2002) MAFFT: a novel method for rapid multiple sequence alignment based on fast Fourier transform. *Nucleic Acids Res* 30(14):3059-3066.
33. Wall DP, Fraser HB, & Hirsh AE (2003) Detecting putative orthologs. *Bioinformatics* 19(13):1710-1711.
34. Porcelli D, Barsanti P, Pesole G, & Caggese C (2007) The nuclear OXPHOS genes in insecta: a common evolutionary origin, a common cis-regulatory motif, a common destiny for gene duplicates. *Bmc Evol Biol* 7:215.
35. Rand DM, Haney RA, & Fry AJ (2004) Cytonuclear coevolution: the genomics of cooperation. *Trends in Ecology & Evolution* 19(12):645-653.
36. D'Elia D, *et al.* (2006) The MitoDrome database annotates and compares the OXPHOS nuclear genes of *Drosophila melanogaster*, *Drosophila pseudoobscura* and *Anopheles gambiae*. *Mitochondrion* 6(5):252-257.
37. Smit AFA, Hubley R, & Green P (1996-2004) Repeatmasker open-3.0).
38. Bao Z & Eddy SR (2002) Automated de novo identification of repeat sequence families in sequenced genomes. *Genome Res* 12(8):1269-1276.
39. Benson G (1999) Tandem repeats finder: a program to analyze DNA sequences. *Nucleic Acids Research* 27(2):573-580.
40. Price AL, Jones NC, & Pevzner PA (2005) De novo identification of repeat

- families in large genomes. *Bioinformatics* 21 Suppl 1:i351-358.
41. Weinstock GM, *et al.* (2006) Insights into social insects from the genome of the honeybee *Apis mellifera*. *Nature* 443(7114):931-949.
  42. Werren JH, *et al.* (2010) Functional and evolutionary insights from the genomes of three parasitoid *Nasonia* species. *Science* 327(5963):343-348.
  43. Robertson HM (1993) The mariner transposable element is widespread in insects. *Nature* 362(6417):241-245.
  44. Kojima KK & Fujiwara H (2005) Long-term inheritance of the 28S rDNA-specific retrotransposon R2. *Mol Biol Evol* 22(11):2157-2165.
  45. Valles SM, *et al.* (2004) A picorna-like virus from the red imported fire ant, *Solenopsis invicta*: initial discovery, genome sequence, and characterization. *Virology* 328(1):151-157.
  46. Valles SM, Strong CA, & Hashimoto Y (2007) A new positive-strand RNA virus with unique genome characteristics from the red imported fire ant, *Solenopsis invicta*. *Virology* 365(2):457-463.
  47. Genersch E & Aubert M (2010) Emerging and re-emerging viruses of the honey bee (*Apis mellifera* L.). *Vet Res* 41(6):54.
  48. Durbin R, Eddy S, Krogh A, & Mitchison G (1998) *Biological sequence analysis: probabilistic models of proteins and nucleic acids* (Cambridge University Press).
  49. Zdobnov EM & Apweiler R (2001) InterProScan--an integration platform for the signature-recognition methods in InterPro. *Bioinformatics* 17(9):847-848.
  50. Moriya Y, Itoh M, Okuda S, Yoshizawa AC, & Kanehisa M (2007) KAAS: an automatic genome annotation and pathway reconstruction server. *Nucleic Acids Research* 35:W182-W185.
  51. Boyle EI, *et al.* (2004) GO::TermFinder--open source software for accessing Gene Ontology information and finding significantly enriched Gene Ontology terms associated with a list of genes. *Bioinformatics* 20(18):3710-3715.
  52. Ashburner M, *et al.* (2000) Gene ontology: tool for the unification of biology. *Nat Genet* 25(1):25-29.
  53. Li L, Stoeckert CJ, Jr., & Roos DS (2003) OrthoMCL: identification of ortholog groups for eukaryotic genomes. *Genome Res* 13(9):2178-2189.
  54. Tweedie S, *et al.* (2009) FlyBase: enhancing *Drosophila* gene ontology annotations. *Nucleic Acids Res* 37(Database issue):D555-559.
  55. Boore JL (1999) Animal mitochondrial genomes. *Nucleic Acids Research* 27(8):1767-1780.
  56. Crozier RH & Crozier YC (1993) The mitochondrial genome of the honeybee *Apis mellifera* complete sequence and genome organization. *Genetics* 133(1):97-117.
  57. Oliveira DCSG, Raychoudhury R, Lavrov DV, & Werren JH (2008) Rapidly evolving mitochondrial genome and directional selection in mitochondrial genes in the parasitic wasp *Nasonia* (Hymenoptera : Pteromalidae). *Molecular Biology and Evolution* 25(10):2167-2180.
  58. Bernardi G (2000) Isochores and the evolutionary genomics of vertebrates. *Gene* 241(1):3-17.
  59. Lander ES, *et al.* (2001) Initial sequencing and analysis of the human genome. *Nature* 409(6822):860-921.



60. Elhaik E, Graur D, & Josi K (2010) Identifying compositionally homogeneous and nonhomogeneous domains within the human genome using a novel segmentation algorithm. *Nucleic Acids Research* in press.
61. Cohen N, Dagan T, Stone L, & Graur D (2005) GC composition of the human genome: in search of isochores. *Mol Biol Evol* 22(5):1260-1272.
62. Elhaik E, Graur D, & Josic K (2010) Comparative testing of DNA segmentation algorithms using benchmark simulations. *Mol Biol Evol* 27(5):1015-1024.
63. Clauset A, Shalizi CR, & Newman MEJ (2007) Power-law distributions in empirical data.).
64. Sokal RR & Rohlf FJ (1995) *Biometry: the principles and practice of statistics in biological research* (W. H. Freeman and Company, New York) 3rd edition Ed.
65. Griffiths-Jones S (2004) The microRNA Registry. *Nucleic Acids Res* 32(Database issue):D109-111.
66. Griffiths-Jones S, Grocock RJ, van Dongen S, Bateman A, & Enright AJ (2006) miRBase: microRNA sequences, targets and gene nomenclature. *Nucleic Acids Res* 34(Database issue):D140-144.
67. Griffiths-Jones S, Saini HK, van Dongen S, & Enright AJ (2008) miRBase: tools for microRNA genomics. *Nucleic Acids Res* 36(Database issue):D154-158.
68. Pearson WR (1990) Rapid and sensitive sequence comparison with FASTP and FASTA. *Methods Enzymol* 183:63-98.
69. Larkin MA, *et al.* (2007) Clustal W and clustal X version 2.0. *Bioinformatics* 23(21):2947-2948.
70. Hofacker IL, *et al.* (1994) Fast folding and comparison of RNA secondary structures. *Monatshefte f. Chemie* 125:167-188.
71. Weaver DB, *et al.* (2007) Computational and transcriptional evidence for microRNAs in the honey bee genome. *Genome Biol* 8(6):R97.
72. Tran T, Havlak P, & Miller J (2006) MicroRNA enrichment among short 'ultraconserved' sequences in insects. *Nucleic Acids Res* 34(9):e65.
73. Hölldobler B & Wilson EO (1990) *The ants* (Belknap Press, Cambridge, Massachusetts) p 733.
74. Moreau CS, Bell CD, Vila R, Archibald SB, & Pierce NE (2006) Phylogeny of the ants: Diversification in the age of angiosperms. *Science* 312(5770):101-104.
75. Brady SG, Schultz TR, Fisher BL, & Ward PS (2006) Evaluating alternative hypotheses for the early evolution and diversification of ants. *Proceedings of the National Academy of Sciences, USA* 103:18172-18177.
76. Abouheif E & Wray GA (2002) Evolution of the gene network underlying wing polyphenism in ants. *Science* 297(5579):249-252.
77. Khila A & Abouheif E (2008) Reproductive constraint is a developmental mechanism that maintains social harmony in advanced ant societies. *Proceedings of the National Academy of Sciences of the United States of America* 105(46):17884-17889.
78. Tsutsui ND & Suarez AV (2003) The colony structure and population biology of invasive ants. *Conservation Biology* 17(1):48-58.
79. Passera L, Keller L, & Suzzoni JP (1988) Control of brood male production in the Argentine ant *Iridomyrmex humilis* (Mayr). *Insectes Sociaux* 35(1):19-33.
80. Elango N, Hunt BG, Goodisman MAD, & Yi SV (2009) DNA methylation is

- widespread and associated with differential gene expression in castes of the honeybee, *Apis mellifera*. Proceedings of the National Academy of Sciences of the United States of America 106(27):11206-11211.
81. Sameshima S, Miura T, & Matsumoto T (2004) Wing disc development during caste differentiation in the ant *Pheidole megacephala* (Hymenoptera: Formicidae). *Evolution and Development* 6:336-341.
  82. Gibson MC & Perrimon N (2005) Extrusion and death of DPP/BMP-compromised epithelial cells in the developing *Drosophila* wing. *Science* 307(5716):1785-1789.
  83. Klattenhoff C, *et al.* (2007) *Drosophila* rasiRNA pathway mutations disrupt embryonic axis specification through activation of an ATR/Chk2 DNA damage response. *Dev Cell* 12(1):45-55.
  84. Robertson HM, Gadau J, & Wanner KW (2010) The insect chemoreceptor superfamily of the parasitoid jewel wasp *Nasonia vitripennis*. *Insect Molecular Biology* 19:121-136.
  85. Robertson HM, Warr CG, & Carlson JR (2003) Molecular evolution of the insect chemoreceptor gene superfamily in *Drosophila melanogaster*. Proceedings of the National Academy of Sciences of the United States of America 100:14537-14542.
  86. Kent LB, Walden KK, & Robertson HM (2008) The Gr family of candidate gustatory and olfactory receptors in the yellow-fever mosquito *Aedes aegypti*. *Chem Senses* 33(1):79-93.
  87. Foret S & Maleszka R (2006) Function and evolution of a gene family encoding odorant binding-like proteins in a social insect, the honey bee (*Apis mellifera*). *Genome Res* 16(11):1404-1413.
  88. Gotzek D & Ross KG (2009) Current status of a model system: the gene Gp-9 and its association with social organization in fire ants. *PLoS One* 4(11):e7713.
  89. Su CY, Menuz K, & Carlson JR (2009) Olfactory perception: receptors, cells, and circuits. *Cell* 139(1):45-59.
  90. Touhara K & Vosshall LB (2009) Sensing odorants and pheromones with chemosensory receptors. *Annu Rev Physiol* 71:307-332.
  91. Jones WD, Cayirlioglu P, Kadow IG, & Vosshall LB (2007) Two chemosensory receptors together mediate carbon dioxide detection in *Drosophila*. *Nature* 445(7123):86-90.
  92. Kwon JY, Dahanukar A, Weiss LA, & Carlson JR (2007) The molecular basis of CO<sub>2</sub> reception in *Drosophila*. *Proc Natl Acad Sci U S A* 104(9):3574-3578.
  93. Lu T, *et al.* (2007) Odor coding in the maxillary palp of the malaria vector mosquito *Anopheles gambiae*. *Curr Biol* 17(18):1533-1544.
  94. Benton R, Vannice KS, Gomez-Diaz C, & Vosshall LB (2009) Variant ionotropic glutamate receptors as chemosensory receptors in *Drosophila*. *Cell* 136(1):149-162.
  95. Kirkness EF, *et al.* (2010) Genome sequences of the human body louse and its primary endosymbiont provide insights into the permanent parasitic lifestyle. *Proc Natl Acad Sci U S A* 107(27):12168-12173.
  96. Nozawa M & Nei M (2007) Evolutionary dynamics of olfactory receptor genes in *Drosophila* species. *Proc Natl Acad Sci U S A* 104(17):7122-7127.
  97. Hill CA, *et al.* (2002) G protein coupled receptors in *Anopheles gambiae*. *Science*

- 298(5591):176-178.
98. Bohbot J, *et al.* (2007) Molecular characterization of the *Aedes aegypti* odorant receptor gene family. *Insect Mol Biol* 16(5):525-537.
  99. Wanner KW, *et al.* (2007) Female-biased expression of odourant receptor genes in the adult antennae of the silkworm, *Bombyx mori*. *Insect Mol Biol* 16(1):107-119.
  100. Tanaka K, *et al.* (2009) Highly selective tuning of a silkworm olfactory receptor to a key mulberry leaf volatile. *Curr Biol* 19(11):881-890.
  101. Smadja C, Shi P, Butlin RK, & Robertson HM (2009) Large gene family expansions and adaptive evolution for odorant and gustatory receptors in the pea aphid, *Acyrtosiphon pisum*. *Mol Biol Evol* 26(9):2073-2086.
  102. Engsontia P, *et al.* (2008) The red flour beetle's large nose: an expanded odorant receptor gene family in *Tribolium castaneum*. *Insect Biochem Mol Biol* 38(4):387-397.
  103. Robertson HM & Wanner KW (2006) The chemoreceptor superfamily in the honey bee, *Apis mellifera*: Expansion of the odorant, but not gustatory, receptor family. *Genome Res* 16(11):1395-1403.
  104. Kelber C, Rossler W, & Kleineidam CJ (2006) Multiple olfactory receptor neurons and their axonal projections in the antennal lobe of the honeybee *Apis mellifera*. *J Comp Neurol* 496(3):395-405.
  105. Nakanishi A, Nishino H, Watanabe H, Yokohari F, & Nishikawa M (2010) Sex-specific antennal sensory system in the ant *Camponotus japonicus*: glomerular organizations of antennal lobes. *J Comp Neurol* 518(12):2186-2201.
  106. Swofford DL (2003) PAUP\*. Phylogenetic Analysis Using Parsimony (\*and other methods). Version 4. (Sinauer Associates, Sunderland, Massachusetts).
  107. Schmidt HA, Strimmer K, Vingron M, & von Haeseler A (2002) TREE-PUZZLE: maximum likelihood phylogenetic analysis using quartets and parallel computing. *Bioinformatics* 18(3):502-504.
  108. Wanner KW, *et al.* (2007) A honey bee odorant receptor for the queen substance 9-oxo-2-decenoic acid. *Proc Natl Acad Sci U S A* 104(36):14383-14388.
  109. Ozaki M, *et al.* (2005) Ant nestmate and non-nestmate discrimination by a chemosensory sensillum. *Science* 309(5732):311-314.
  110. Brandt M, van Wilgenburg E, Sulc R, Shea KJ, & Tsutsui ND (2009) The scent of supercolonies: the discovery, synthesis and behavioural verification of ant colony recognition cues. *Bmc Biology* 7:-.
  111. Bray S & Amrein H (2003) A putative *Drosophila* pheromone receptor expressed in male-specific taste neurons is required for efficient courtship. *Neuron* 39(6):1019-1029.
  112. Ebbs ML & Amrein H (2007) Taste and pheromone perception in the fruit fly *Drosophila melanogaster*. *Pflugers Arch* 454(5):735-747.
  113. Croset V, *et al.* (2010) Ancient protostome origin of chemosensory ionotropic glutamate receptors and the evolution of insect taste and olfaction. *Plos Genet* 6(8):e1001064.
  114. Tsutsui ND (2004) Scents of self: The expression component of self/nonsel recognition systems. *Ann Zool Fenn* 41(6):713-727.
  115. Payne CM, Tillberg CV, & Suarez AV (2004) Recognition systems and biological

- invasions. *Ann Zool Fenn* 41(6):843-858.
116. Hefetz A, Errard C, Chambris A, & LeNegrate A (1996) Postpharyngeal gland secretion as a modifier of aggressive behavior in the myrmicine ant *Manica rubida*. *Journal of Insect Behavior* 9(5):709-717.
  117. Torres CW, Brandt M, & Tsutsui ND (2007) The role of cuticular hydrocarbons as chemical cues for nestmate recognition in the invasive Argentine ant (*Linepithema humile*). *Insectes Sociaux* 54(4):363-373.
  118. Lahav S, Soroker V, Hefetz A, & Vander Meer RK (1999) Direct behavioral evidence for hydrocarbons as ant recognition discriminators. *Naturwissenschaften* 86(5):246-249.
  119. Carlin NF & Hölldobler B (1986) The kin recognition system of carpenter ants (*Camponotus* spp.) I. Hierarchical cues in small colonies. *Behavioral Ecology and Sociobiology* 19:123-134.
  120. Martin S & Drijfhout F (2009) A review of ant cuticular hydrocarbons. *Journal of Chemical Ecology* 35(10):1151-1161.
  121. Gleason JM, Jallon JM, Rouault JD, & Ritchie MG (2005) Quantitative trait loci for cuticular hydrocarbons associated with sexual isolation between *Drosophila simulans* and *D. sechellia*. *Genetics* 171(4):1789-1798.
  122. Dallerac R, *et al.* (2000) A Delta 9 desaturase gene with a different substrate specificity is responsible for the cuticular diene hydrocarbon polymorphism in *Drosophila melanogaster*. *Proceedings of the National Academy of Sciences of the United States of America* 97(17):9449-9454.
  123. Lemieux C, Otis C, & Turmel M (2000) Ancestral chloroplast genome in *Mesostigma viride* reveals an early branch of green plant evolution. *Nature* 403:649-652.
  124. Legendre A, Miao XX, Da Lage JL, & Wicker-Thomas C (2008) Evolution of a desaturase involved in female pheromonal cuticular hydrocarbon biosynthesis and courtship behavior in *Drosophila*. *Insect Biochemistry and Molecular Biology* 38(2):244-255.
  125. Liang D (2001) Hydrocarbon-released nestmate aggression in the Argentine ant, *Linepithema humile*, following encounters with insect prey. *Comparative Biochemistry and Physiology Part B* 129:871-882.
  126. Castresana J (2000) Selection of conserved blocks from multiple alignments for their use in phylogenetic analysis. *Mol Biol Evol* 17(4):540-552.
  127. Abascal F, Zardoya R, & Posada D (2005) ProtTest: selection of best-fit models of protein evolution. *Bioinformatics* 21(9):2104-2105.
  128. Stamatakis A (2006) RAxML-VI-HPC: maximum likelihood-based phylogenetic analyses with thousands of taxa and mixed models. *Bioinformatics* 22(21):2688-2690.
  129. Thompson JD, Higgins DG, & Gibson TJ (1994) CLUSTAL W: improving the sensitivity of progressive multiple sequence alignment through sequence weighting, position-specific gap penalties and weight matrix choice. *Nucleic Acids Res* 22(22):4673-4680.
  130. Hughes CL & Kaufman TC (2002) Hox genes and the evolution of the arthropod body plan. *Evol Dev* 4(6):459-499.
  131. Lemons D & McGinnis W (2006) Genomic evolution of Hox gene clusters.

- Science 313(5795):1918-1922.
132. Dearden PK, *et al.* (2006) Patterns of conservation and change in honey bee developmental genes. *Genome Res* 16(11):1376-1384.
  133. Evans JD, *et al.* (2006) Immune pathways and defence mechanisms in honey bees *Apis mellifera*. *Insect Molecular Biology* 15(5):645-656.
  134. Christophides GK, *et al.* (2002) Immunity-related genes and gene families in *Anopheles gambiae*. *Science* 298(5591):159-165.
  135. Sackton TB, *et al.* (2007) Dynamic evolution of the innate immune system in *Drosophila*. *Nat Genet* 39(12):1461-1468.
  136. Cremer S, Armitage SAO, & Schmid-Hempel P (2007) Social immunity. *Current Biology* 17(16):R693-R702.
  137. Dukas R (2008) Evolutionary biology of insect learning. *Annual Review of Entomology* 53:145-160.
  138. Skoulakis EMC & Grammenoudi S (2006) Dunces and da Vincis: The genetics of learning and memory in *Drosophila*. *Cell Mol Life Sci* 63(9):975-988.
  139. Liu X & Davis RL (2006) Insect olfactory memory in time and space. *Curr Opin Neurobiol* 16(6):679-685.
  140. Waddell S & Quinn WG (2001) Flies, genes, and learning. *Annu Rev Neurosci* 24:1283-1309.
  141. Schwaerzel M, *et al.* (2003) Dopamine and octopamine differentiate between aversive and appetitive olfactory memories in *Drosophila*. *J Neurosci* 23(33):10495-10502.
  142. Tempel BL, Livingstone MS, & Quinn WG (1984) Mutations in the dopa decarboxylase gene affect learning in *Drosophila*. *P Natl Acad Sci-Biol* 81(11):3577-3581.
  143. Grotewiel MS, Beck CDO, Wu KH, Zhu XR, & Davis RL (1998) Integrin-mediated short-term memory in *Drosophila*. *Nature* 391(6666):455-460.
  144. Cheng YZ, *et al.* (2001) *Drosophila fasciclin II* is required for the formation of odor memories and for normal sensitivity to alcohol. *Cell* 105(6):757-768.
  145. Dudai Y, Jan YN, Byers D, Quinn WG, & Benzer S (1976) *Dunce*, a mutant of *Drosophila* deficient in learning. *Proceedings of the National Academy of Sciences of the United States of America* 73(5):1684-1688.
  146. Acevespina EO, *et al.* (1983) Learning and memory in *Drosophila*, studied with mutants. *Cold Spring Harb Sym* 48:831-840.
  147. Griffith LC, *et al.* (1993) Inhibition of calcium calmodulin-dependent protein-kinase in *Drosophila* disrupts behavioral plasticity. *Neuron* 10(3):501-509.
  148. Joiner MLA & Griffith LC (1997) CaM kinase II and visual input modulate memory formation in the neuronal circuit controlling courtship conditioning. *J Neurosci* 17(23):9384-9391.
  149. Mehren JE & Griffith LC (2004) Calcium-independent calcium/calmodulin-dependent protein kinase II in the adult *Drosophila* CNS enhances the training of pheromonal cues. *J Neurosci* 24(47):10584-10593.
  150. Dubnau J, *et al.* (2003) The staufen/pumilio pathway is involved in *Drosophila* long-term memory. *Current Biology* 13(4):286-296.
  151. Thomas ML, Payne-Makrisa CM, Suarez AV, Tsutsui ND, & Holway DA (2006) When supercolonies collide: territorial aggression in an invasive and unicolonial

- social insect. *Molecular Ecology* 15(14):4303-4315.
152. Tsutsui ND, Suarez AV, & Grosberg RK (2003) Genetic diversity, asymmetrical aggression, and recognition in a widespread invasive species. *Proceedings of the National Academy of Sciences of the United States of America* 100:1078-1083.
  153. Holway DA, Suarez AV, & Case TJ (1998) Loss of intraspecific aggression in the success of a widespread invasive social insect. *Science (Washington D C)* 283(5390):949-952.
  154. Nelson RJ (2006) *Biology of Aggression* (Oxford University Press, New York).
  155. Edwards AC & Mackay TF (2009) Quantitative trait loci for aggressive behavior in *Drosophila melanogaster*. *Genetics* 182(3):889-897.
  156. Dierick HA & Greenspan RJ (2006) Molecular analysis of flies selected for aggressive behavior. *Nat Genet* 38(9):1023-1031.
  157. Edwards AC, *et al.* (2009) A transcriptional network associated with natural variation in *Drosophila* aggressive behavior. *Genome Biol* 10(7):R76.
  158. Edwards AC, Zwartz L, Yamamoto A, Callaerts P, & Mackay TF (2009) Mutations in many genes affect aggressive behavior in *Drosophila melanogaster*. *BMC Biol* 7:29.
  159. Alaux C, *et al.* (2009) Honey bee aggression supports a link between gene regulation and behavioral evolution. *Proc Natl Acad Sci U S A* 106(36):15400-15405.
  160. Edwards AC, Rollmann SM, Morgan TJ, & Mackay TFC (2006) Quantitative genomics of aggressive behavior in *Drosophila melanogaster*. *Plos Genet* 2(9):1386-1395.
  161. Barron AB, Maleszka R, Helliwell PG, & Robinson GE (2009) Effects of cocaine on honey bee dance behaviour. *J Exp Biol* 212(Pt 2):163-168.
  162. Claeys I, *et al.* (2002) Insulin-related peptides and their conserved signal transduction pathway. *Peptides* 23(4):807-816.
  163. Wheeler DE, Buck N, & Evans JD (2006) Expression of insulin pathway genes during the period of caste determination in the honey bee, *Apis mellifera*. *Insect Molecular Biology* 15(5):597-602.
  164. Evans JD & Wheeler DE (1999) Differential gene expression between developing queens and workers in the honey bee, *Apis mellifera*. *Proceedings of the National Academy of Sciences of the United States of America* 96(10):5575-5580.
  165. Patel A, *et al.* (2007) The making of a queen: TOR pathway Is a key player in diphenic caste development. *Plos One* 2(6):-.
  166. de Azevedo SV & Hartfelder K (2008) The insulin signaling pathway in honey bee (*Apis mellifera*) caste development - differential expression of insulin-like peptides and insulin receptors in queen and worker larvae. *J Insect Physiol* 54(6):1064-1071.
  167. Smith CR, Toth AL, Suarez AV, & Robinson GE (2008) Genetic and genomic analyses of the division of labour in insect societies. *Nat Rev Genet* 9(10):735-748.
  168. Smith CR (2007) Energy use and allocation in the Florida harvester ant, *Pogonomyrmex badius*: are stored seeds a buffer? *Behavioral Ecology and Sociobiology* 61(9):1479-1487.
  169. Tillberg CV, Holway DA, Lebrun EG, & Suarez AV (2007) Trophic ecology of

- invasive Argentine ants in their native and introduced ranges. *Proc Natl Acad Sci U S A* 104(52):20856-20861.
170. Chenna R, *et al.* (2003) Multiple sequence alignment with the Clustal series of programs. *Nucleic Acids Res* 31(13):3497-3500.
  171. Rozen S & Skaletsky HJ (2000) Primer3 on the WWW for general users and for biologist programmers. *Bioinformatics Methods and Protocols: Methods in Molecular Biology*, eds Krawetz S & Misener S (Humana Press, Totowa, NJ), pp 365-386.
