# Supplementary material
Source: PubMed Central journal article supplement (PMC3078359)
Supplement: 1008617108_sapp02.pdf [file 1008617108_sapp02.pdf]

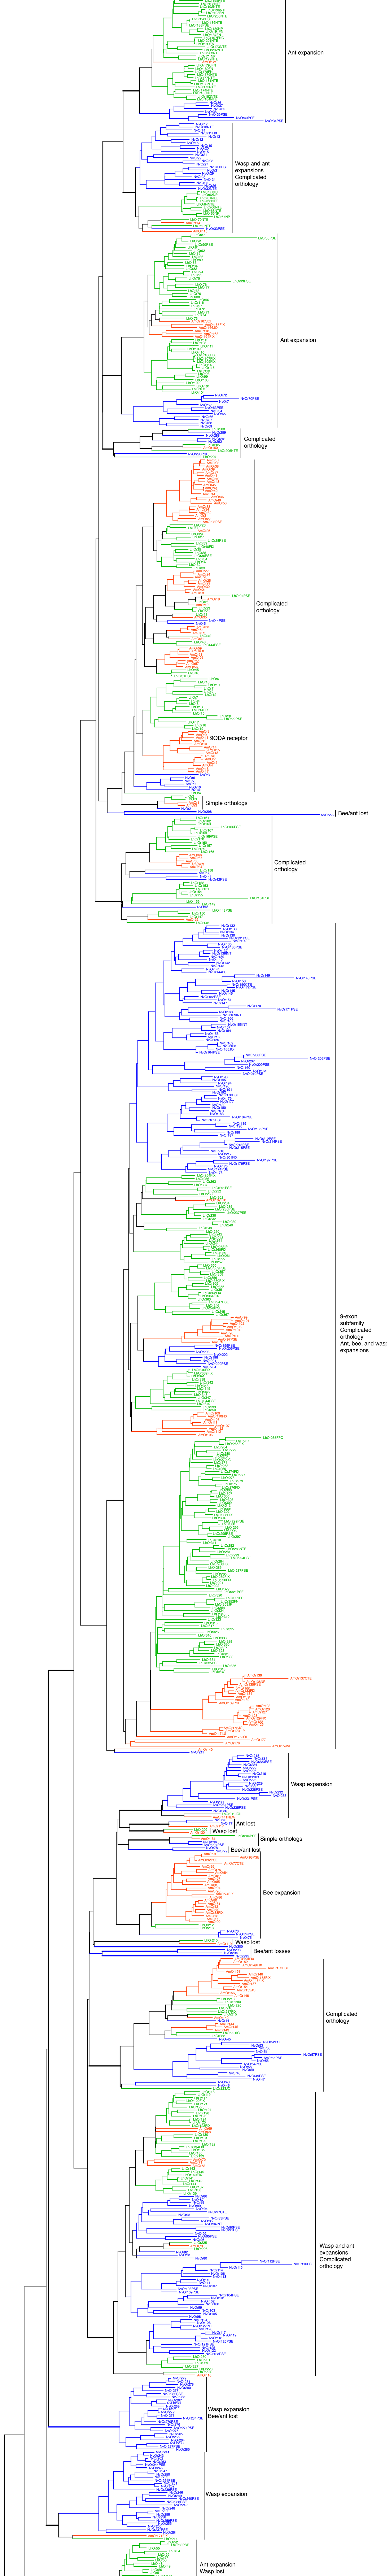

Ant expansion

Wasp and ant expansions  
Complicated orthology

Ant expansion

Complicated orthology

Complicated orthology

90DA receptor

Simple orthologs

Bee/ant lost

Complicated orthology

9-exon subfamily  
Complicated orthology  
Ant, bee, and wasp expansions

Wasp expansion

Ant lost  
|  
Wasp lost

Simple orthologs  
|  
Bee/ant lost

Bee expansion

Wasp lost  
|  
Bee/ant losses

Complicated orthology

Wasp and ant expansions  
Complicated orthology

Wasp expansion  
|  
Bee/ant lost

Ant expansion

Ant lost

— 10% corrected distance  
— DmOr83b orthologs
